# Supplementary material for: N-Functionalization of β-aminophosphonates: cytotoxic effects of the new derivatives
Source: Royal Society of Chemistry journal article supplement (doi:10.1039/d4ob00243a), 2024-01-01

## Supporting Information 2

### N-Functionalization of $\alpha$ -aminophosphonates; Cytotoxic effect of the new derivatives

György Keglevich,<sup>\*a</sup> Petra Regina Varga,<sup>a</sup> Emőke Dinnyési,<sup>a</sup> Zsuzsanna Szalai,<sup>a</sup> Szilvia Bősze,<sup>b</sup> Oláhné Szabó Rita,<sup>b,c</sup> László Drahos,<sup>d</sup> Konstantin Karaghiosoff<sup>e</sup>

*a.* Department of Organic Chemistry and Technology, Faculty of Chemical Technology and Biotechnology, Budapest University of Technology and Economics, Műegyetem rkp. 3., H-1111 Budapest, Hungary. E-mail: [keglevich.gyorgy@vbk.bme.hu](mailto:keglevich.gyorgy@vbk.bme.hu)

*b.* Eötvös Loránd Research Network (ELKH), Research Group of Peptide Chemistry, Eötvös Loránd University, H-1117 Budapest, Hungary

*c.* Department of Genetics, Cell-and Immunobiology, Semmelweis University, Nagyvárad tér 4, H-1089 Budapest, Hungary

*d.* MS Proteomics Research Group, Research Centre for Natural Sciences, H-1117 Budapest, Hungary

*e.* Department Chemie, Ludwig-Maximilians-Universität München, Butenandtstr. 5-13, D-81377 München, Germany. E-mail: [konstantin.karaghiosoff@cup.uni-muenchen.de](mailto:konstantin.karaghiosoff@cup.uni-muenchen.de)

### 2D NMR spectra for 7a, 7b, 8a, 8b and 9a

$^1\text{H}, ^1\text{H}$  COSY in  $\text{CDCl}_3$  for **7a**

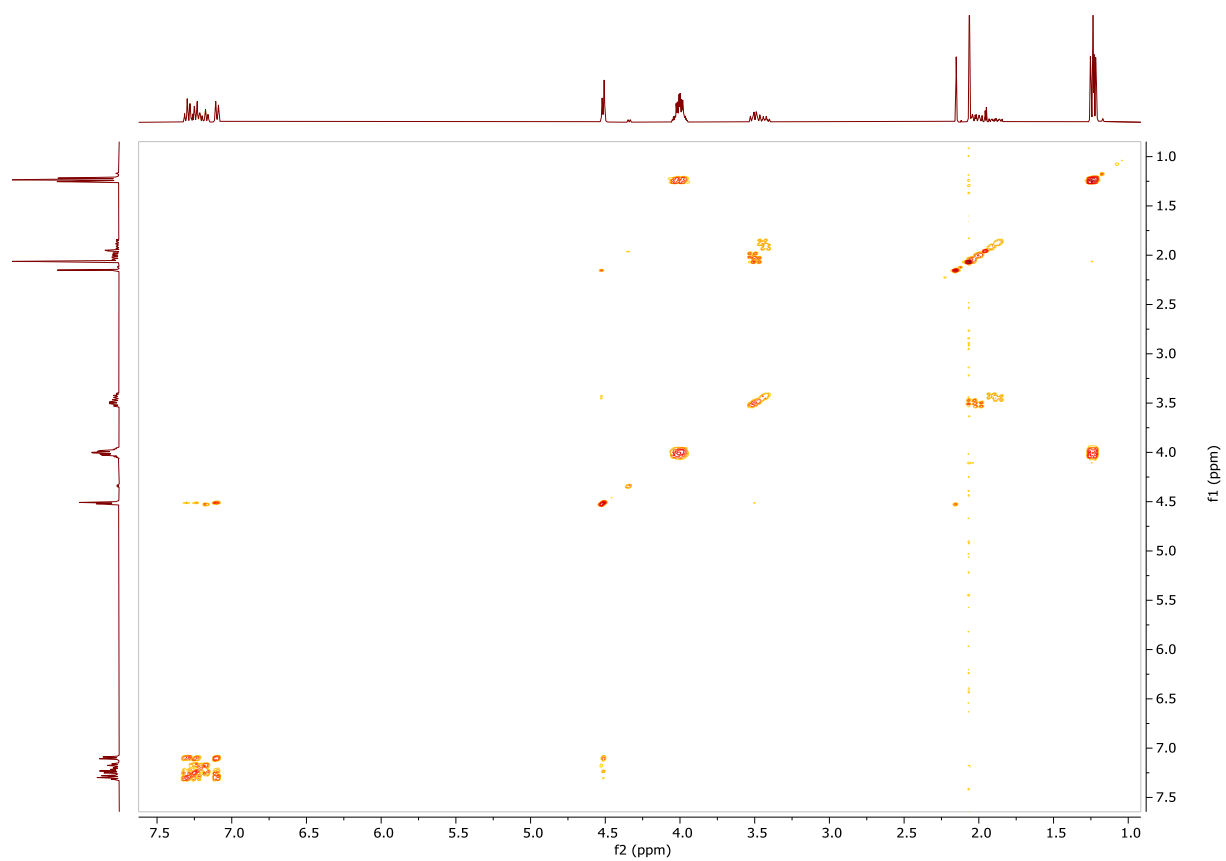

$^1\text{H}, ^1\text{H}$  COSY in  $\text{CDCl}_3$  for **7a** (zoomed in)

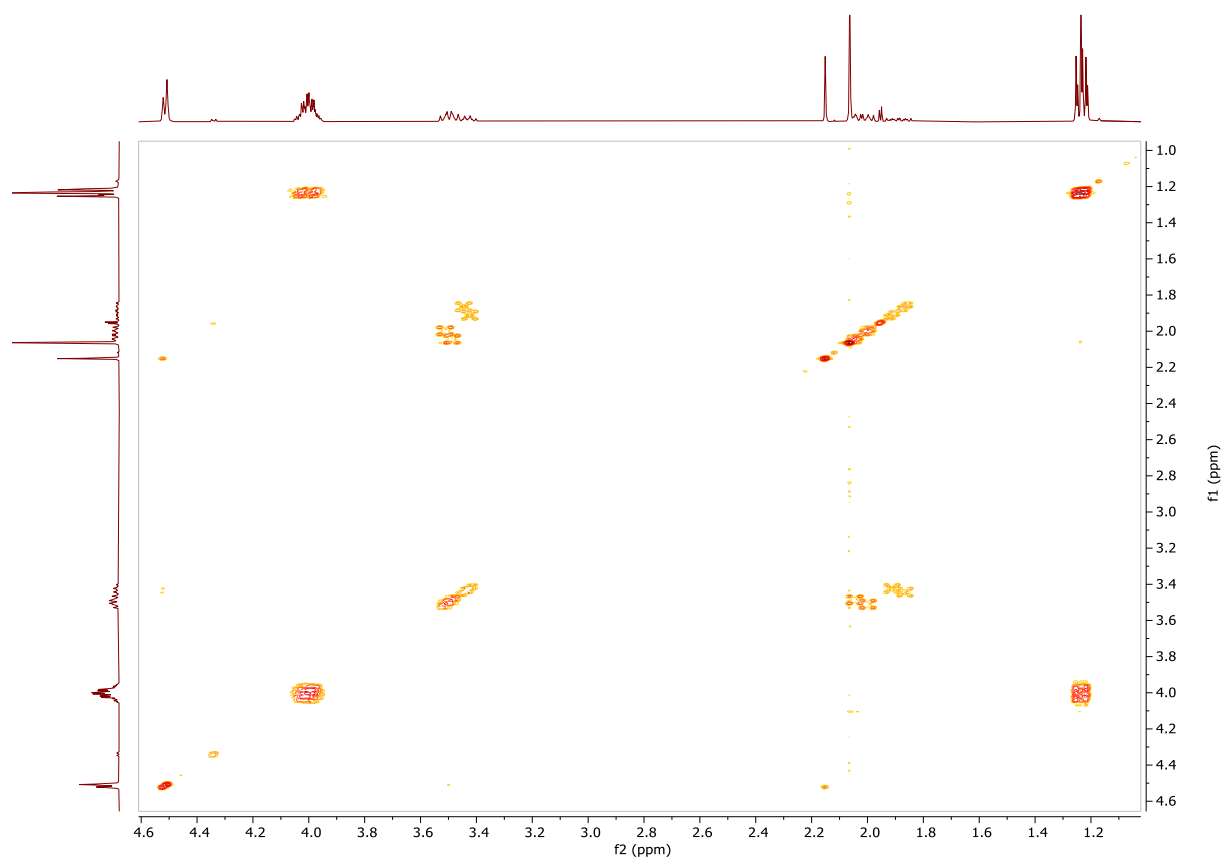

$^1\text{H}, ^1\text{H}$  COSY in  $\text{CDCl}_3$  for **7a** (zoomed in)

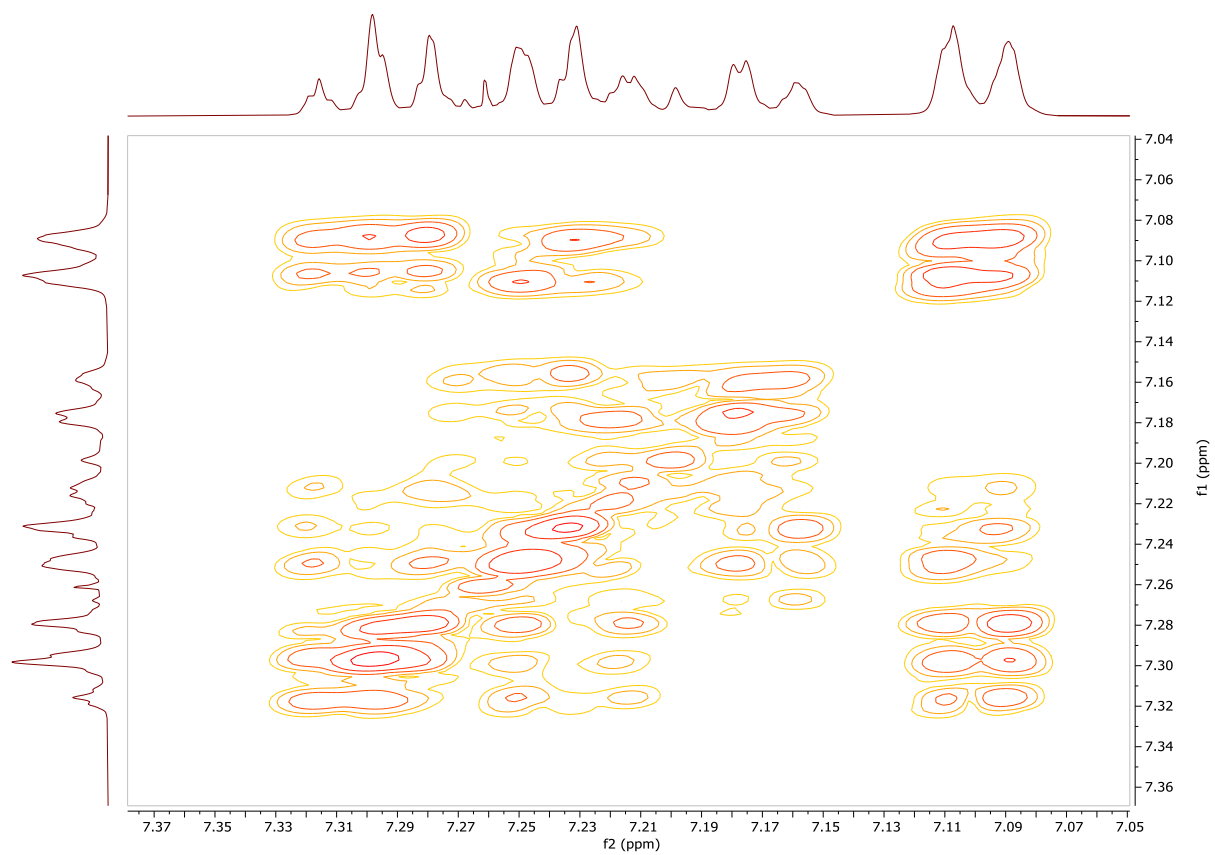

$^1\text{H}$ ,  $^{13}\text{C}$  HSQC in  $\text{CDCl}_3$  for **7a**

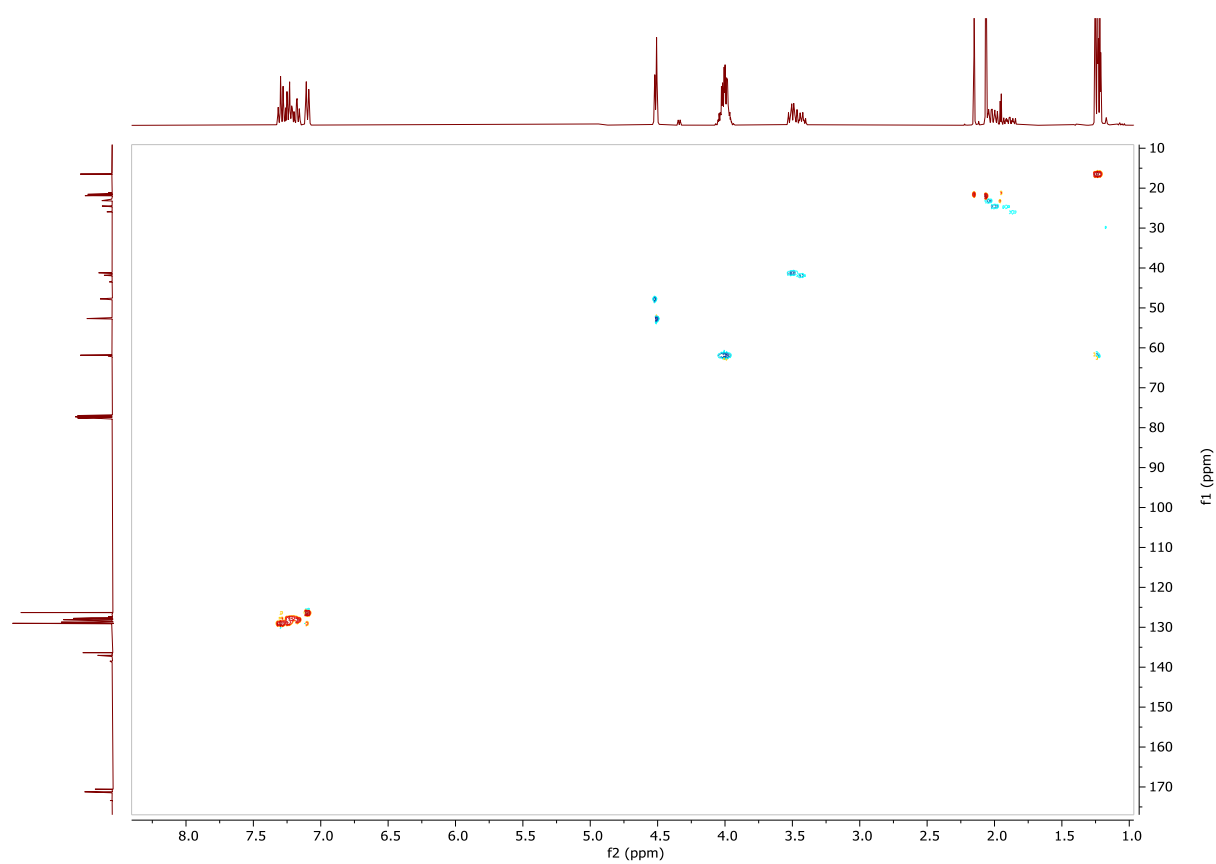

$^1\text{H}$ ,  $^{13}\text{C}$  HSQC in  $\text{CDCl}_3$  for **7a** (zoomed in)

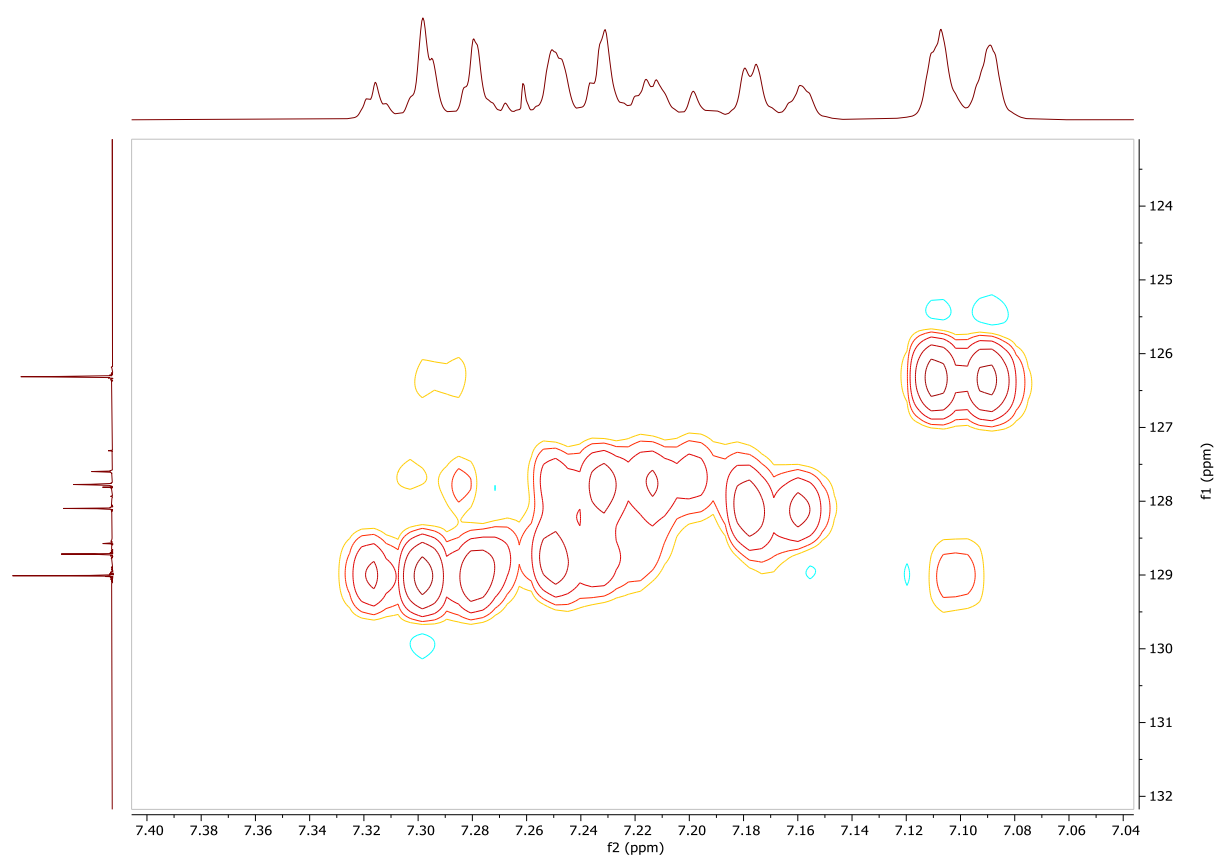

$^1\text{H}$ ,  $^{13}\text{C}$  HSQC in  $\text{CDCl}_3$  for **7a** (zoomed in)

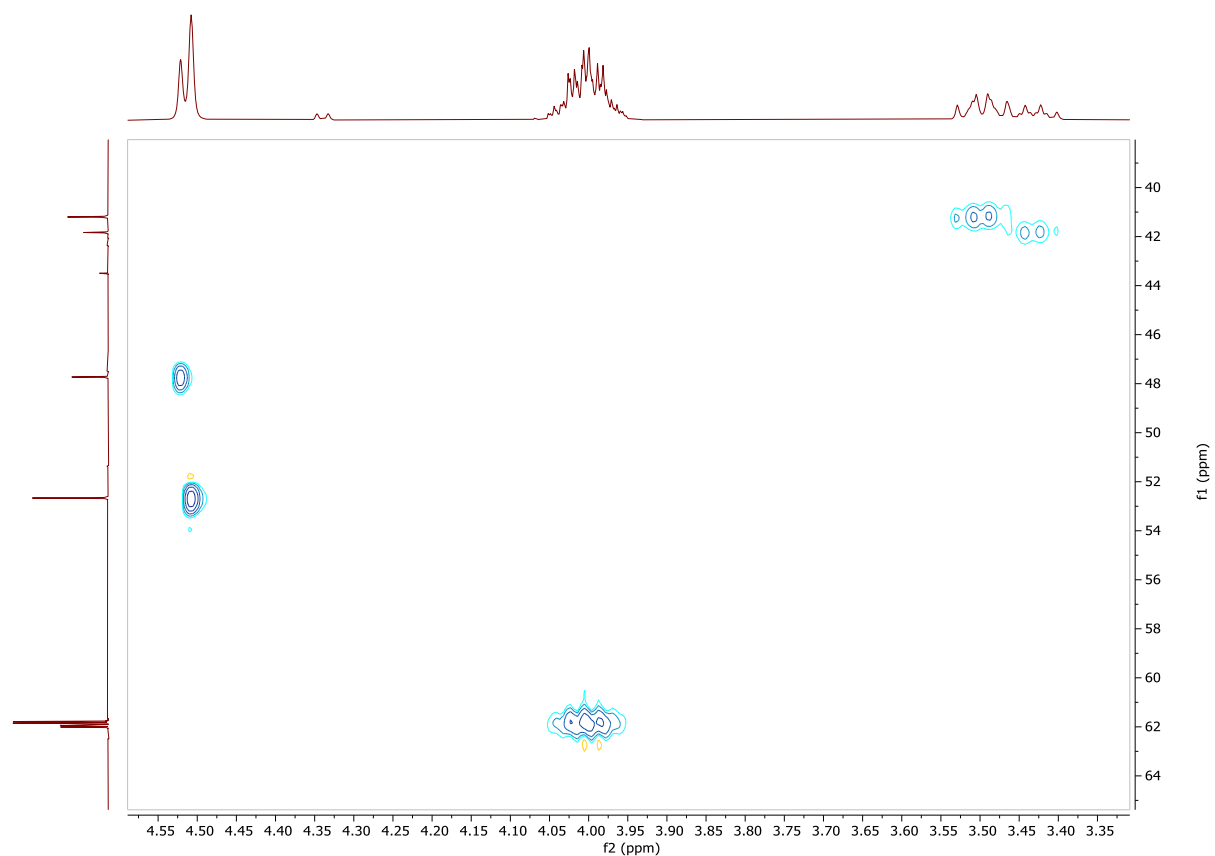

$^1\text{H}$ ,  $^{13}\text{C}$  HSQC in  $\text{CDCl}_3$  for **7a** (zoomed in)

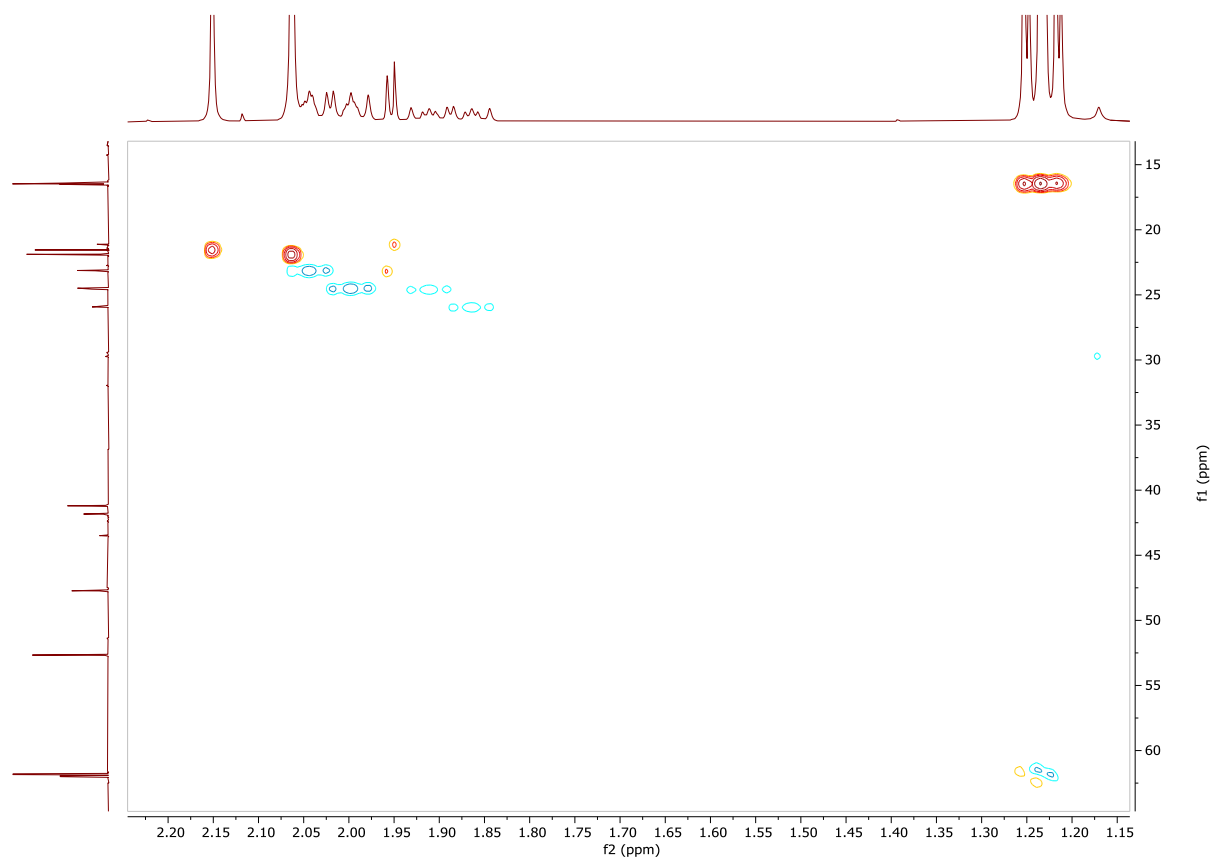

$^1\text{H}$ ,  $^{13}\text{C}$  HMBC in  $\text{CDCl}_3$  for **7a**

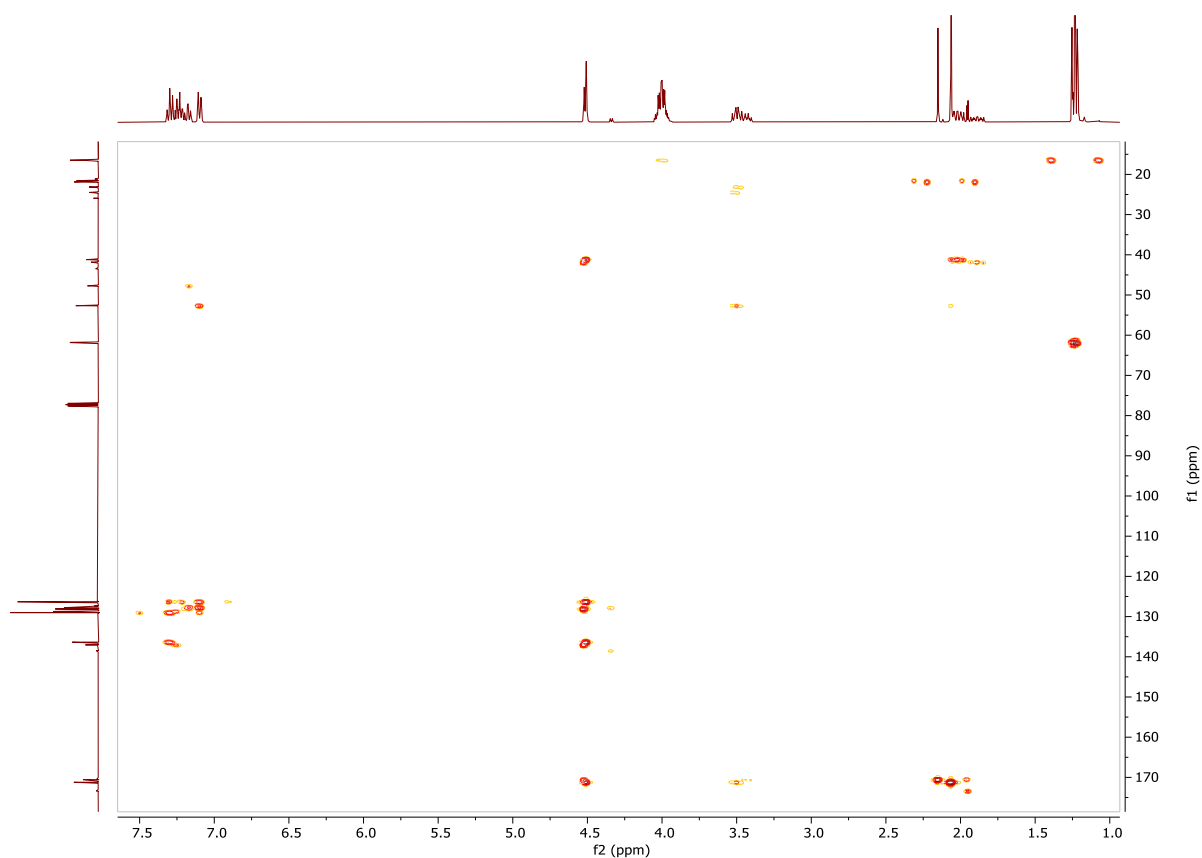

$^1\text{H}$ ,  $^{13}\text{C}$  HMBC in  $\text{CDCl}_3$  for **7a** (zoomed in)

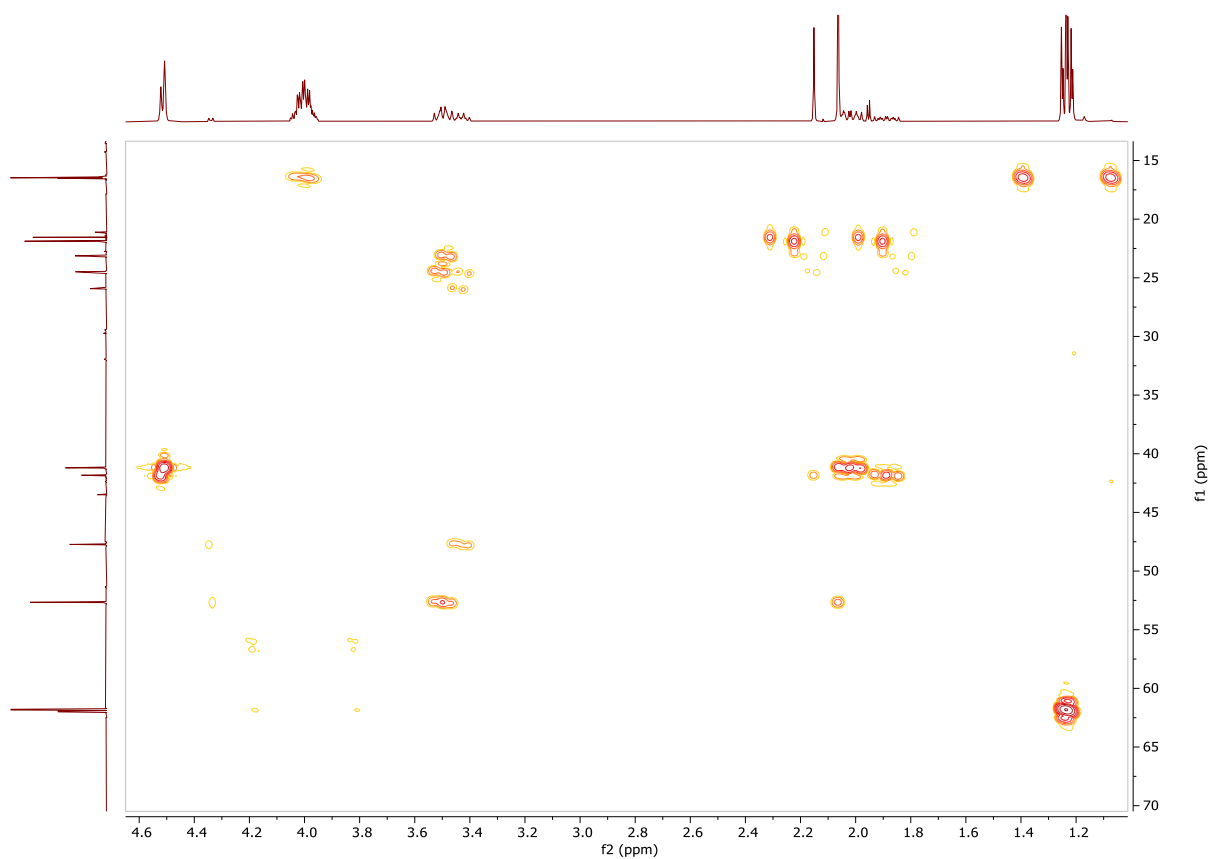

$^1\text{H}$ ,  $^{13}\text{C}$  HMBC in  $\text{CDCl}_3$  for **7a** (zoomed in)

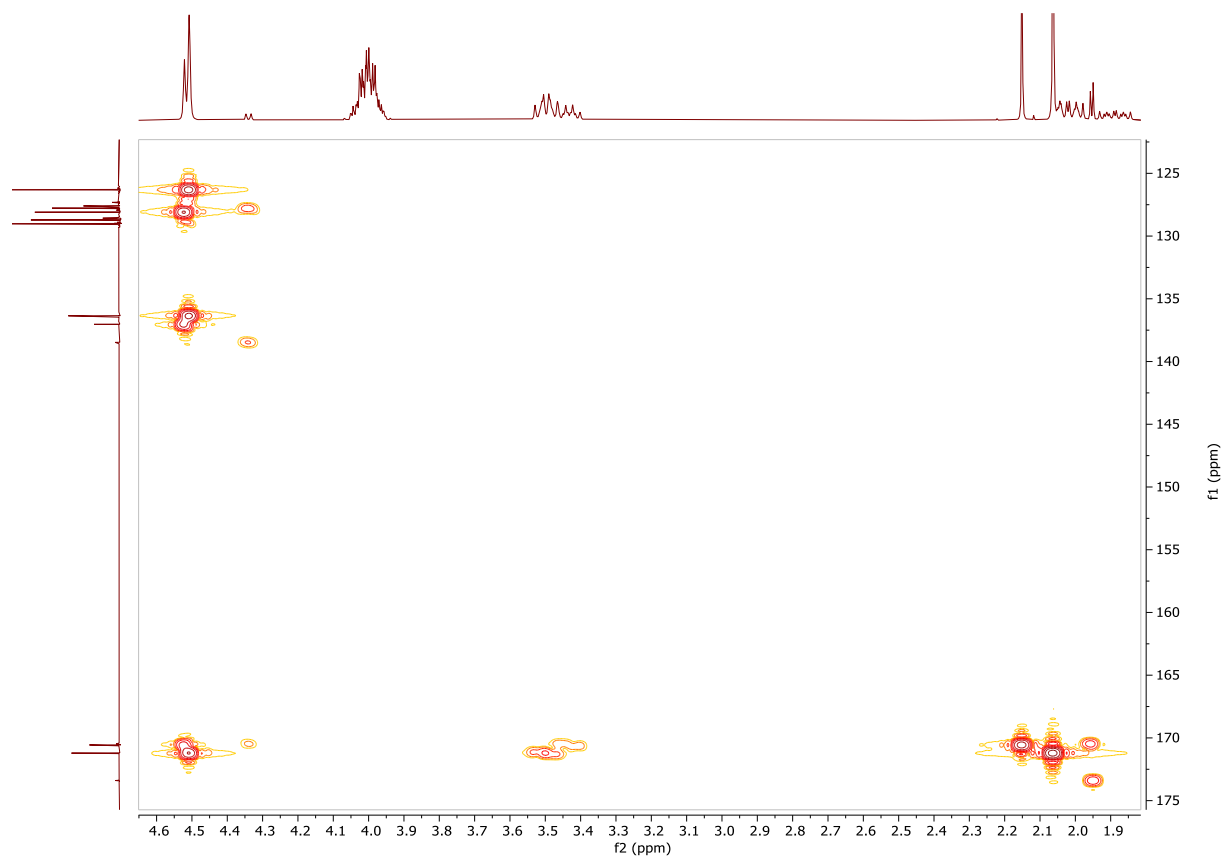

$^1\text{H}$ ,  $^{13}\text{C}$  HMBC in  $\text{CDCl}_3$  for **7a** (zoomed in)

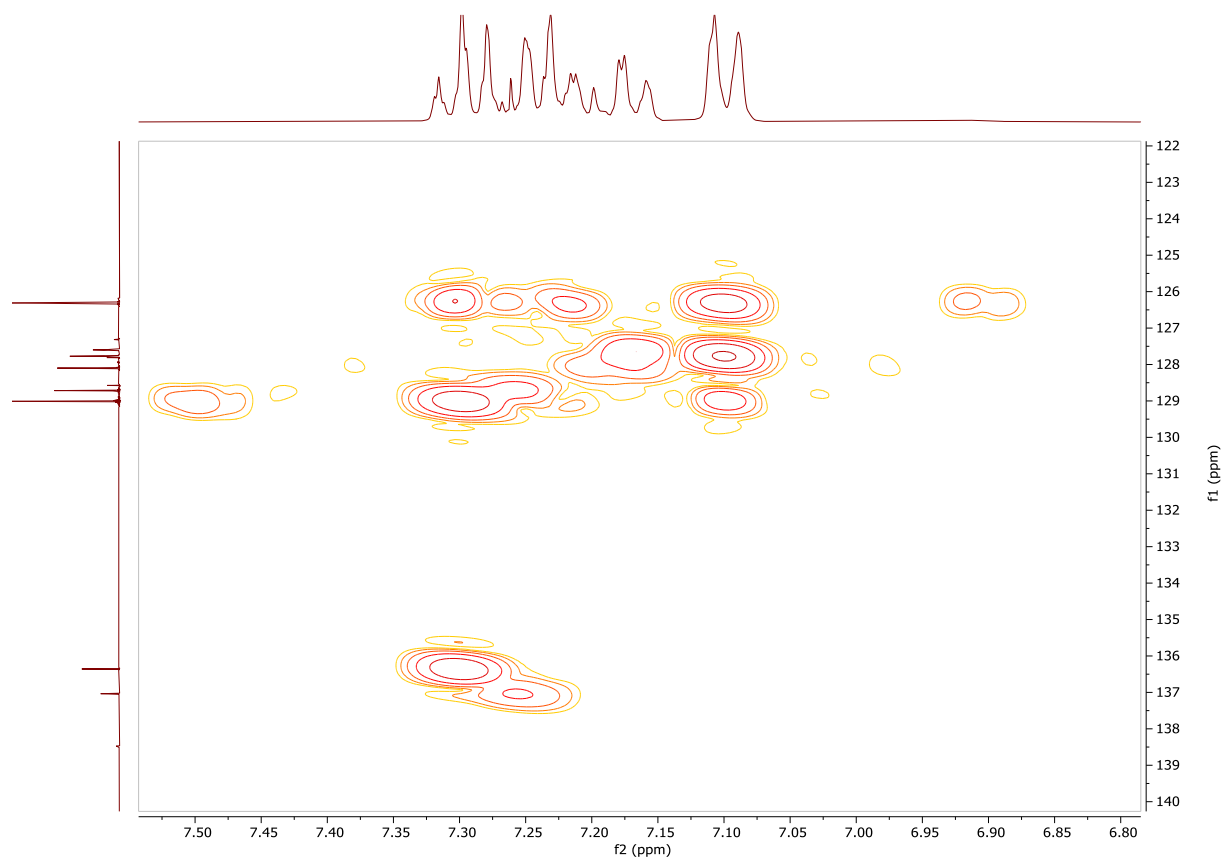

$^1\text{H}$ ,  $^{13}\text{C}$  HMBC in  $\text{CDCl}_3$  for **7a** (zoomed in)

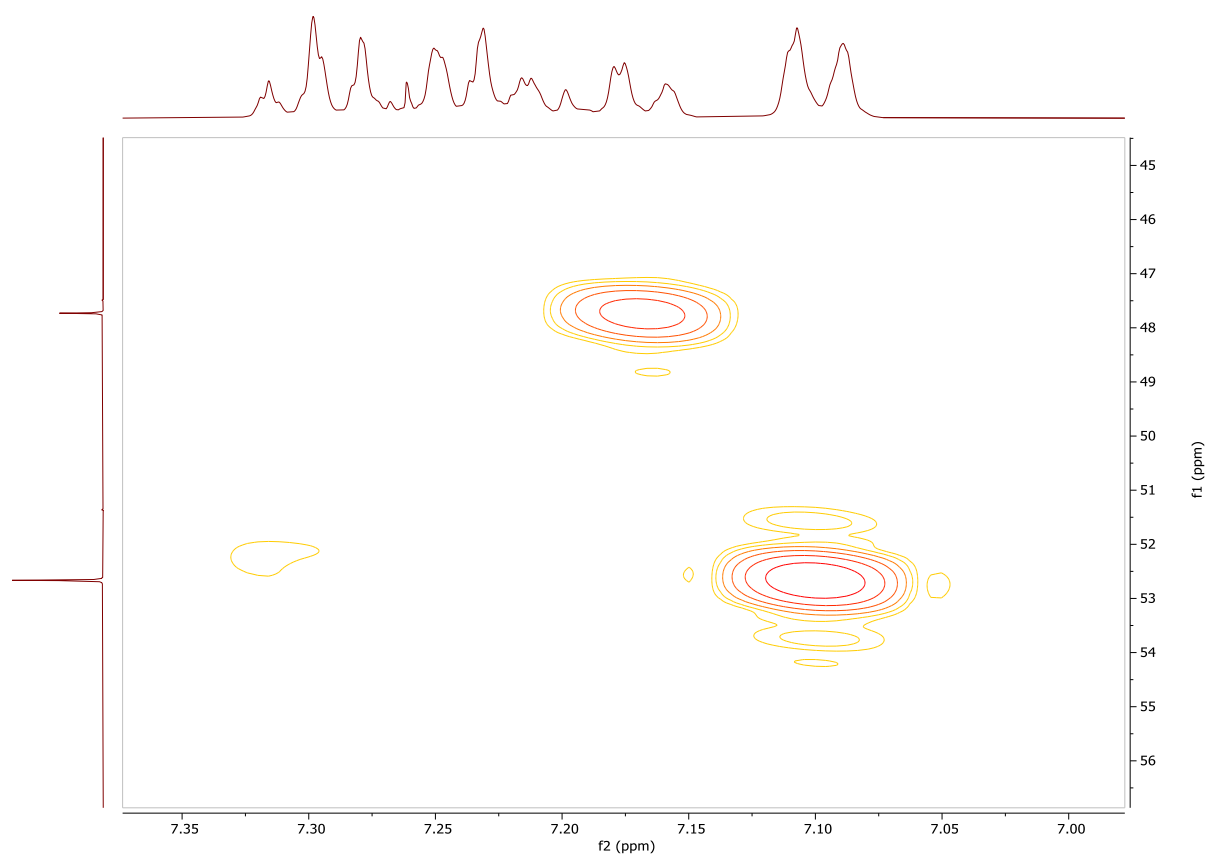



$^1\text{H}, ^1\text{H}$  NOESY in  $\text{CDCl}_3$  for **7a**

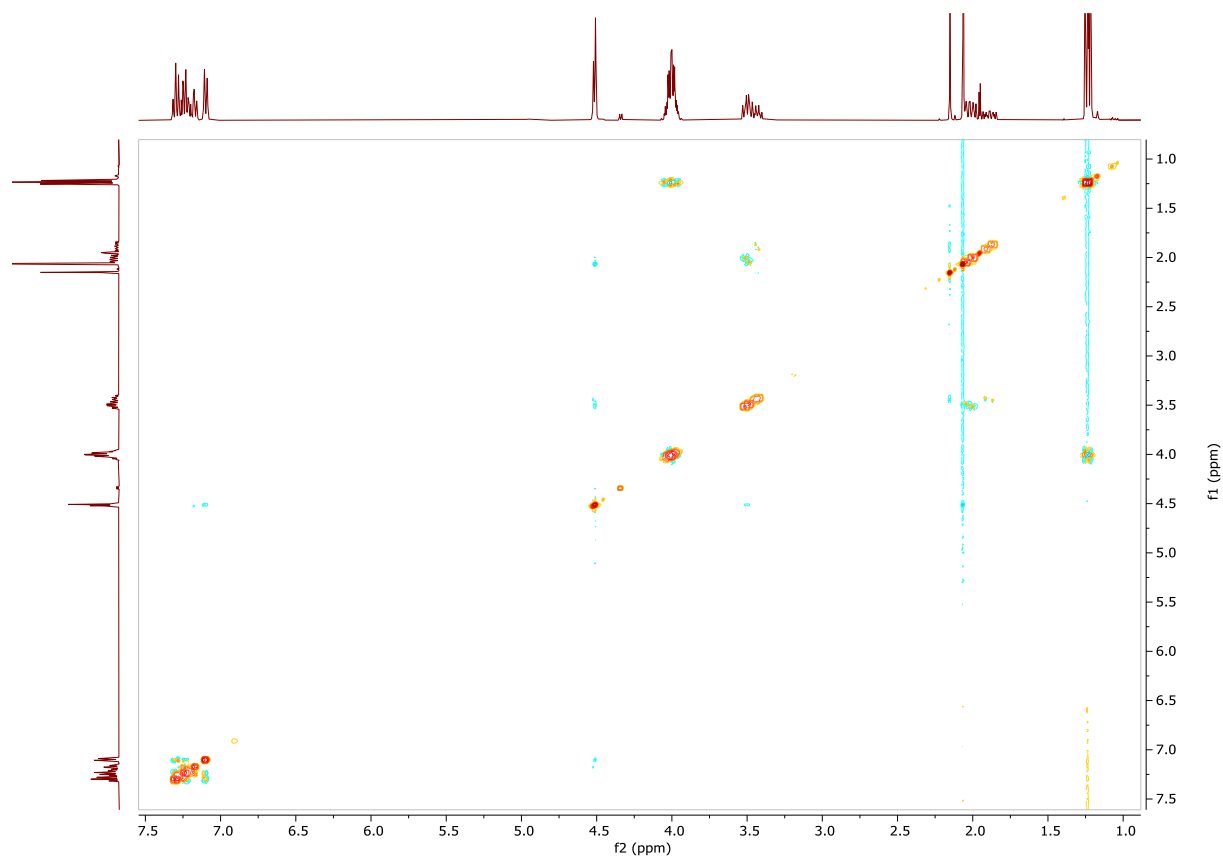

$^1\text{H}, ^1\text{H}$  NOESY in  $\text{CDCl}_3$  for **7a** (zoomed in)

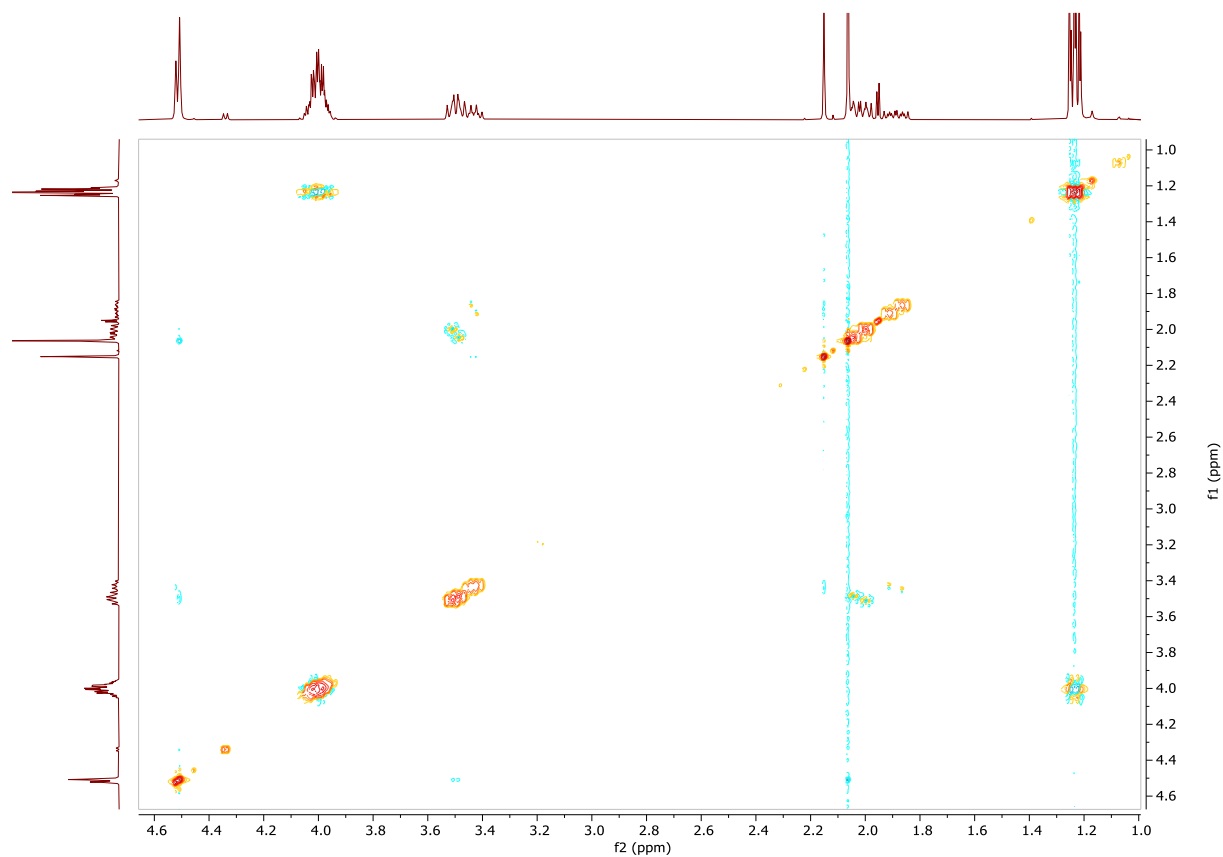

$^1\text{H}$ ,  $^{15}\text{N}$  HMBC in  $\text{CDCl}_3$  for **7a**

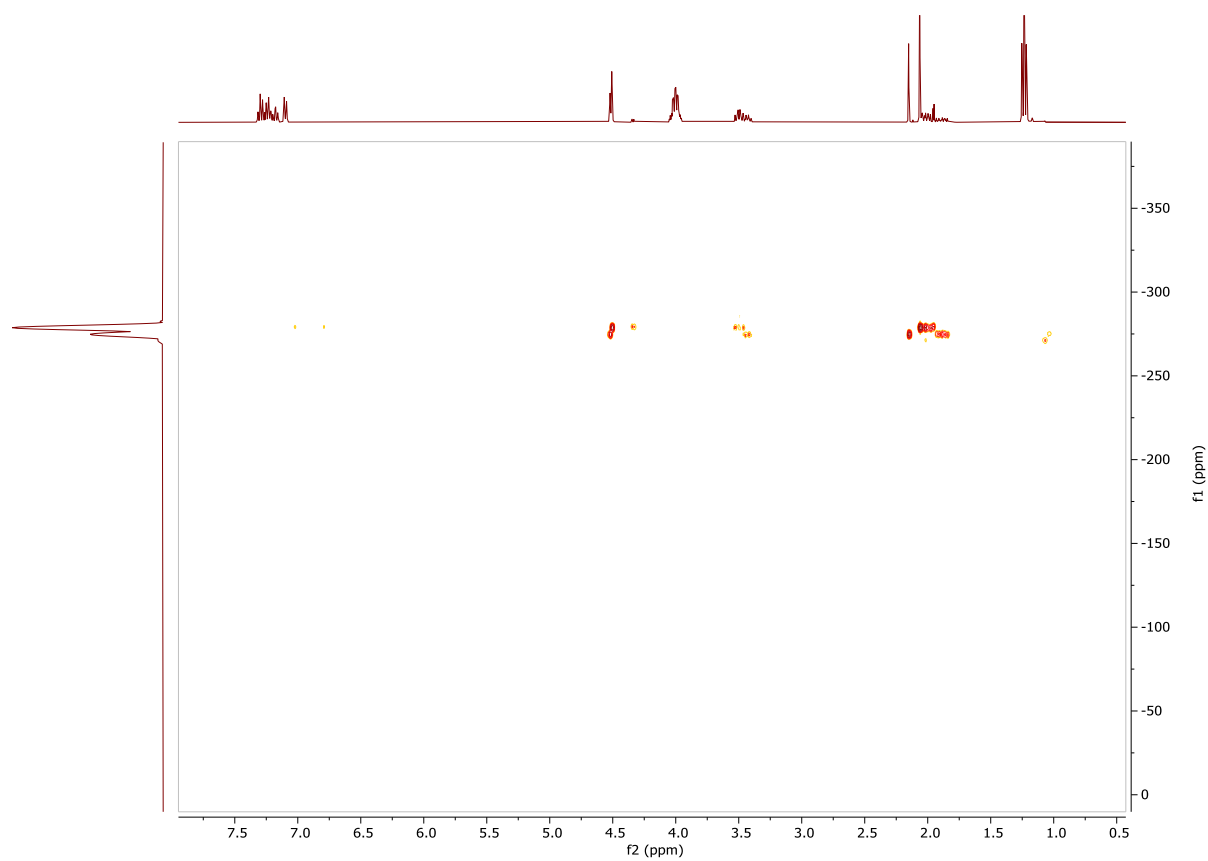

$^1\text{H}$ ,  $^{15}\text{N}$  HMBC in  $\text{CDCl}_3$  for **7a** (zoomed in)

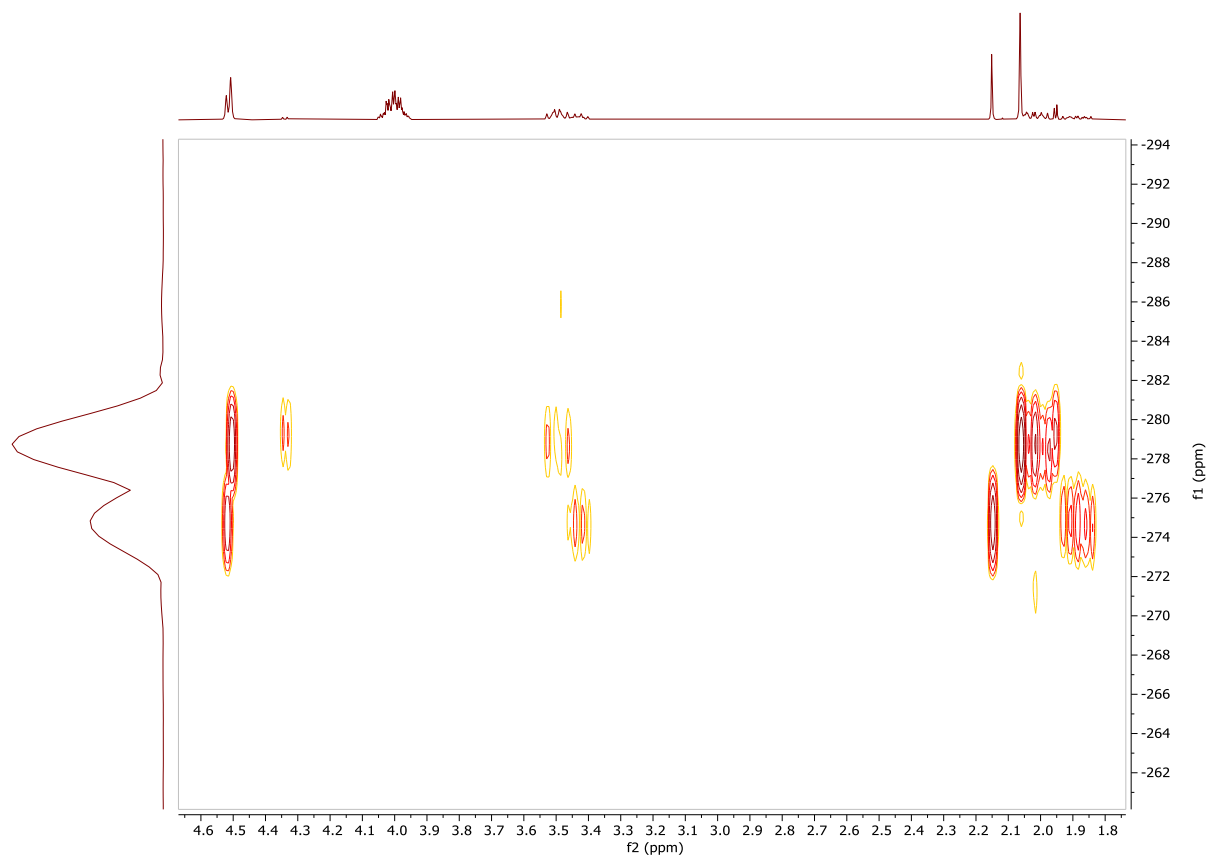

$^1\text{H}, ^1\text{H}$  COSY in  $\text{CDCl}_3$  for **7b**

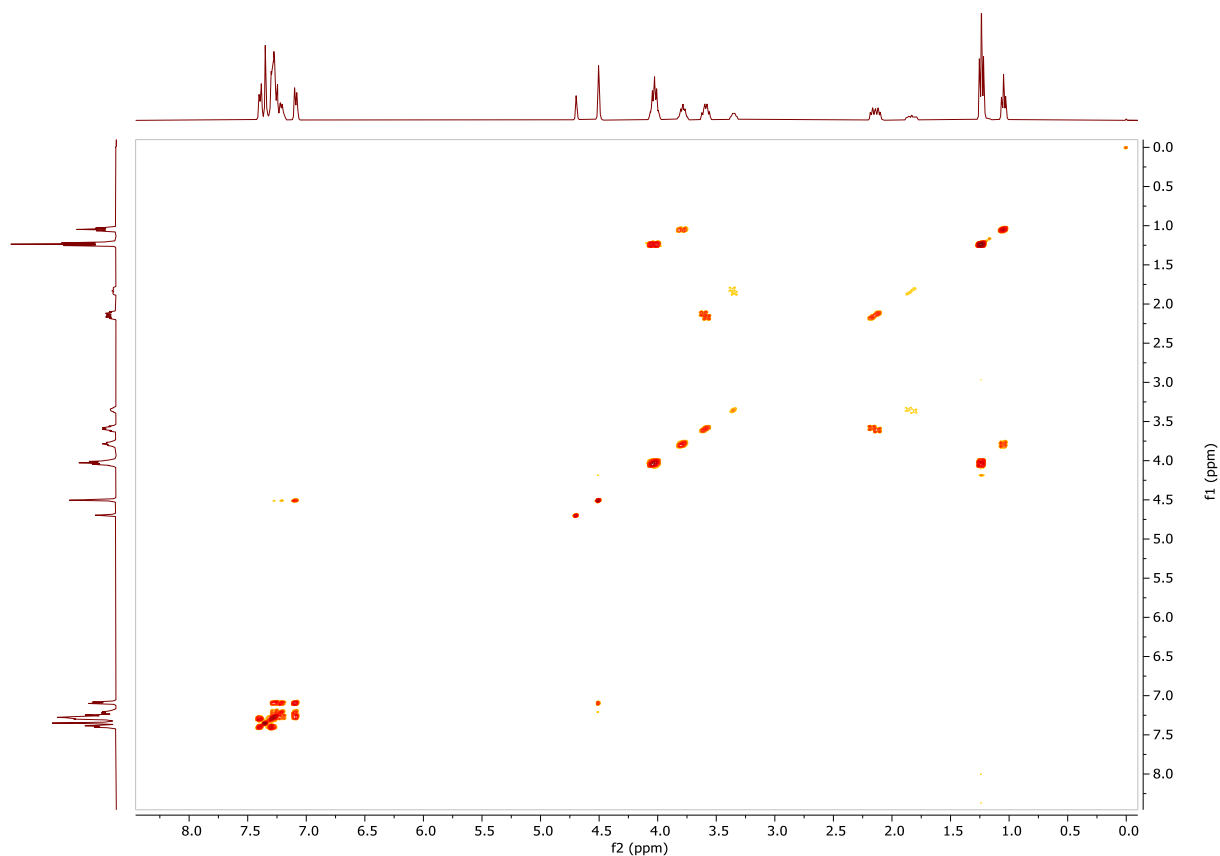

$^1\text{H}, ^1\text{H}$  COSY in  $\text{CDCl}_3$  for **7b** (zoomed in)

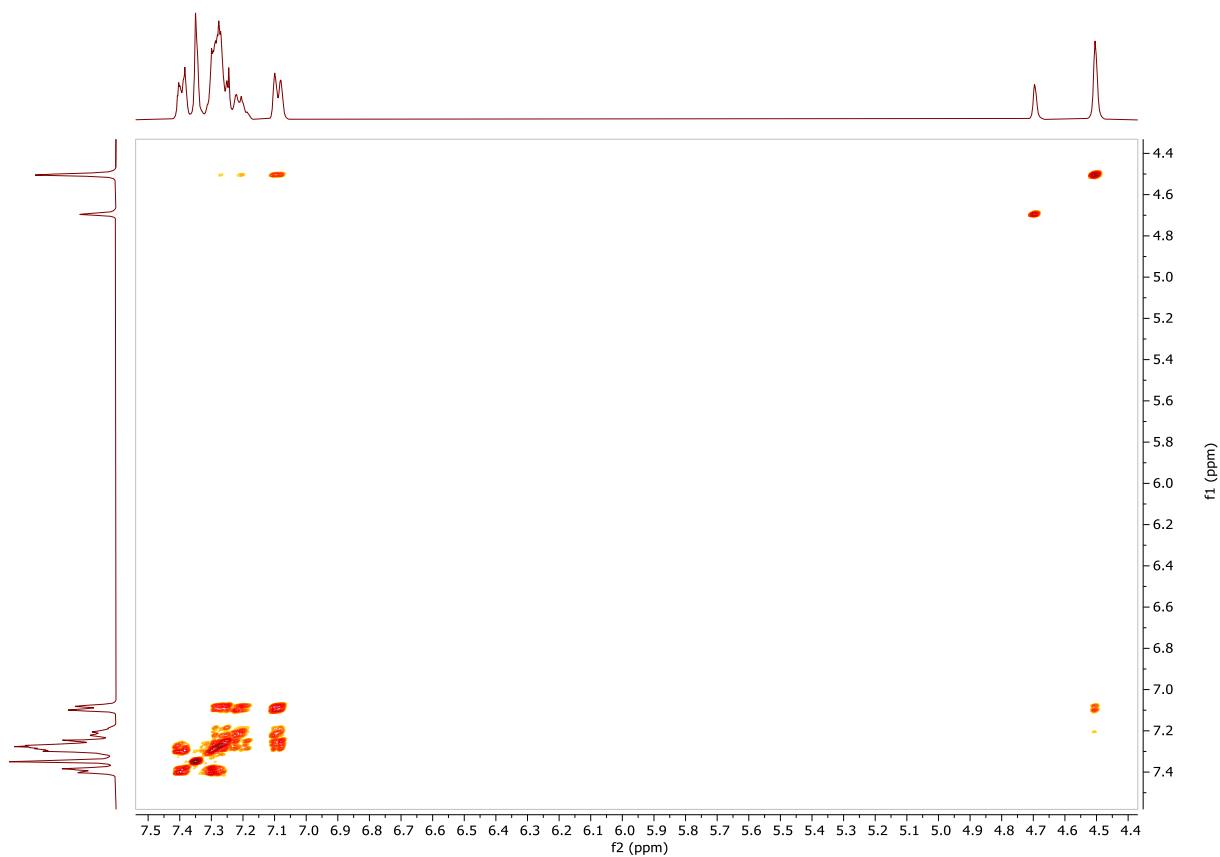

$^1\text{H}, ^1\text{H}$  COSY in  $\text{CDCl}_3$  for **7b** (zoomed in)

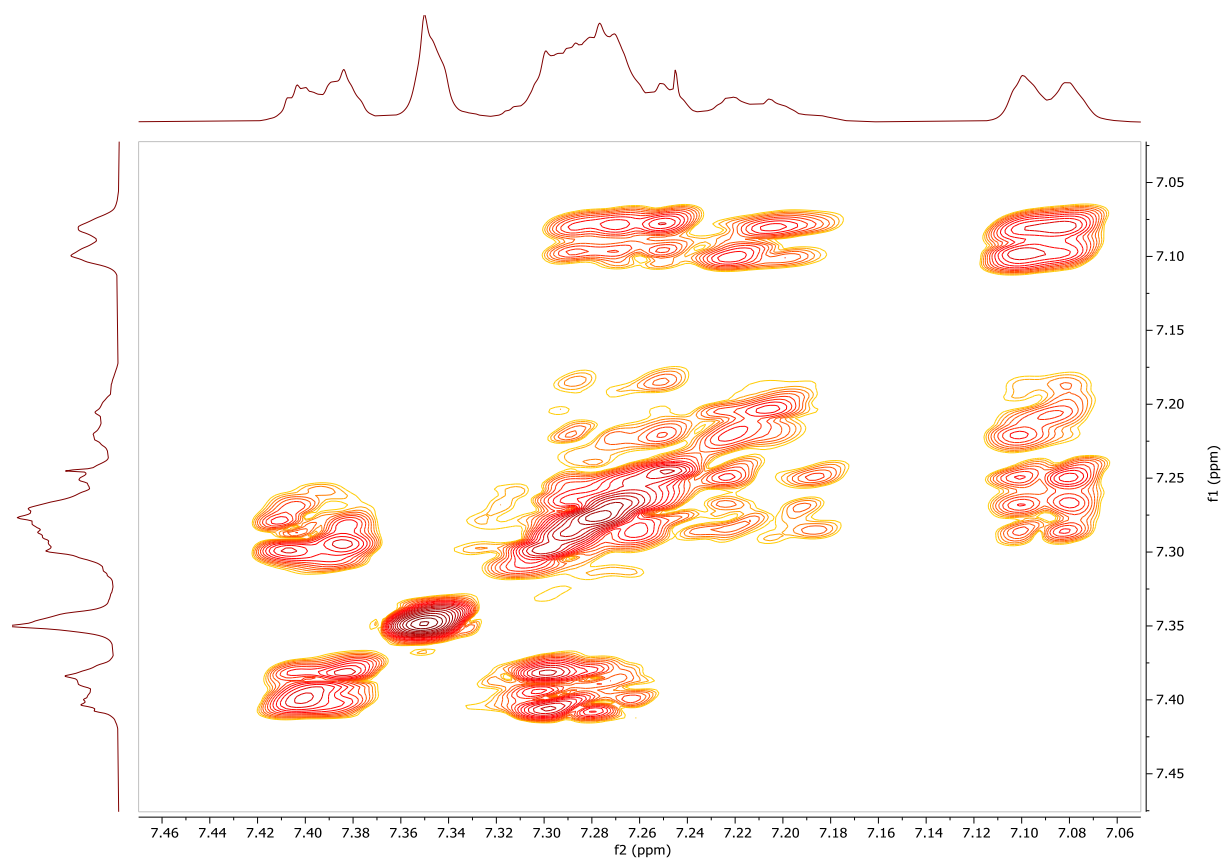

$^1\text{H}, ^1\text{H}$  COSY in  $\text{CDCl}_3$  for **7b** (zoomed in)

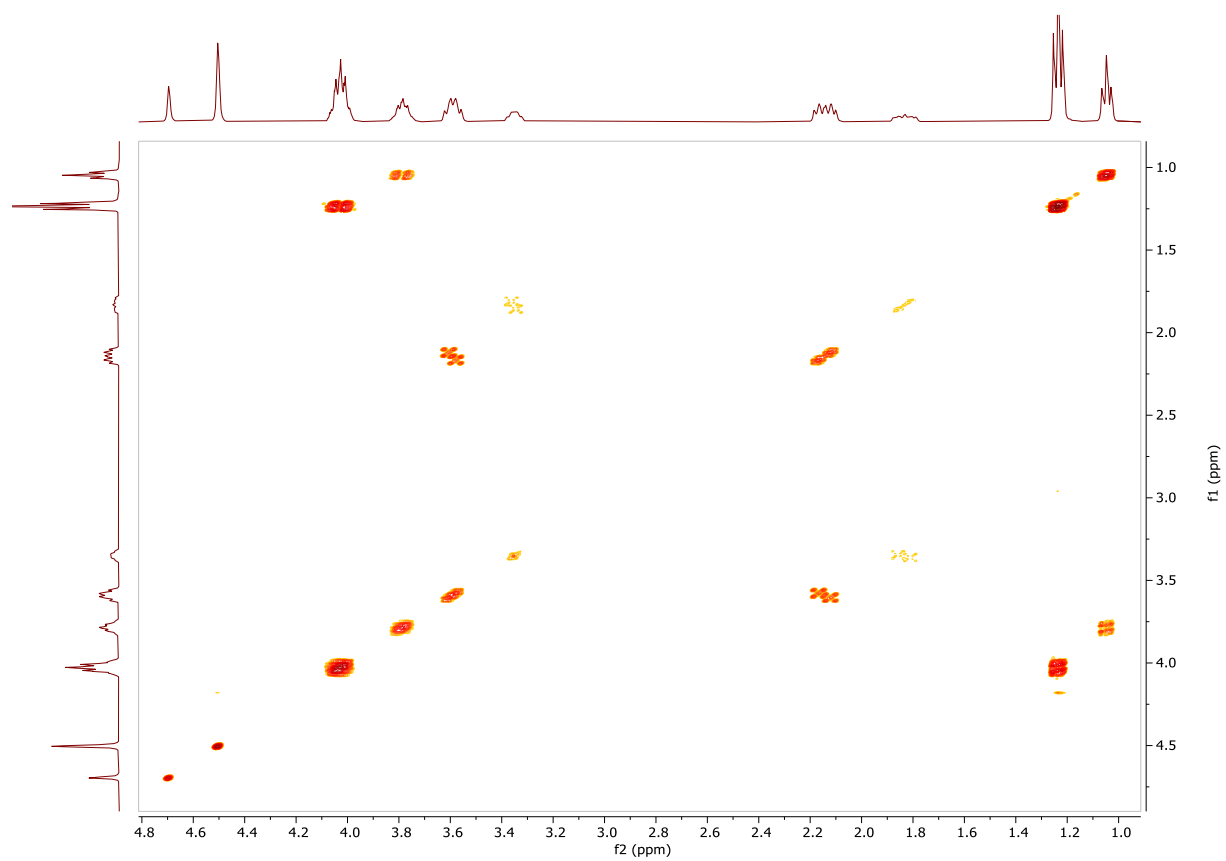

$^1\text{H}$ ,  $^{13}\text{C}$  HSQC in  $\text{CDCl}_3$  for **7b**

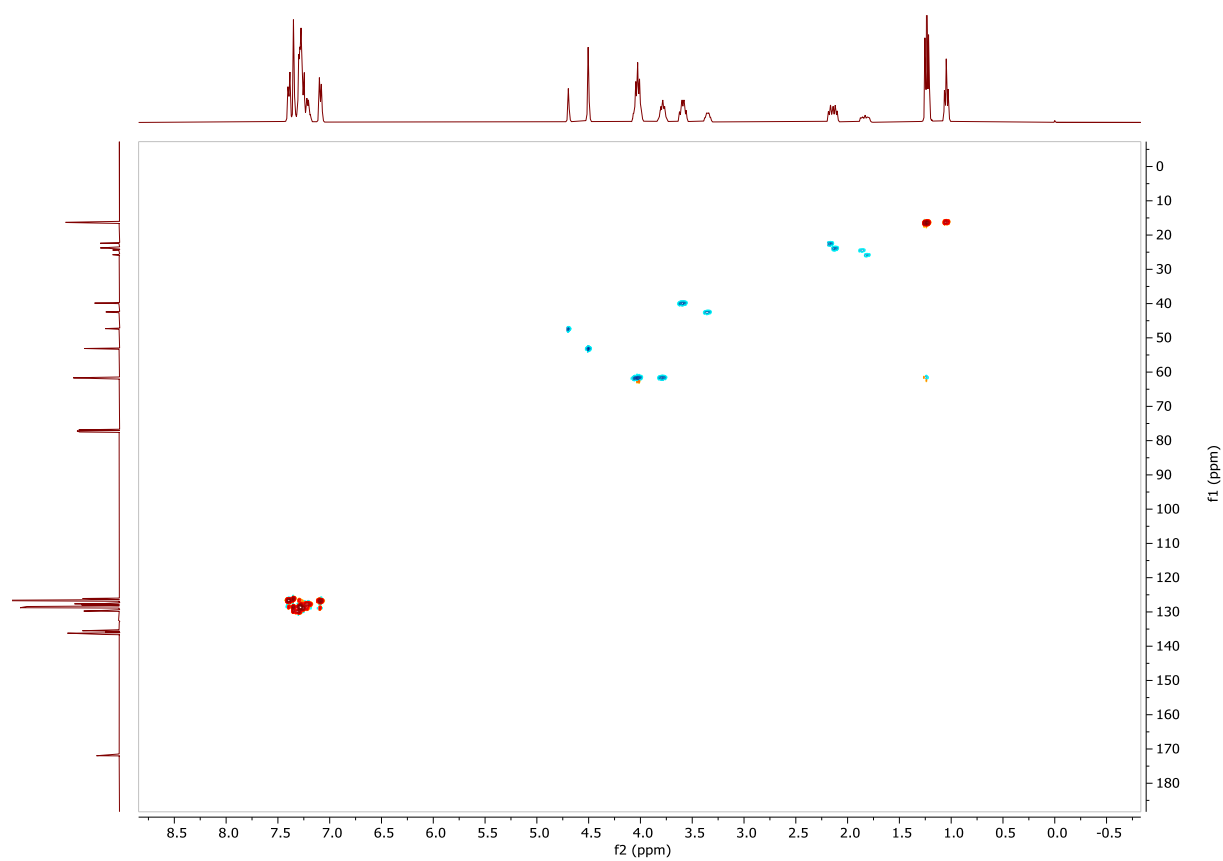

$^1\text{H}$ ,  $^{13}\text{C}$  HSQC in  $\text{CDCl}_3$  for **7b** (zoomed in)

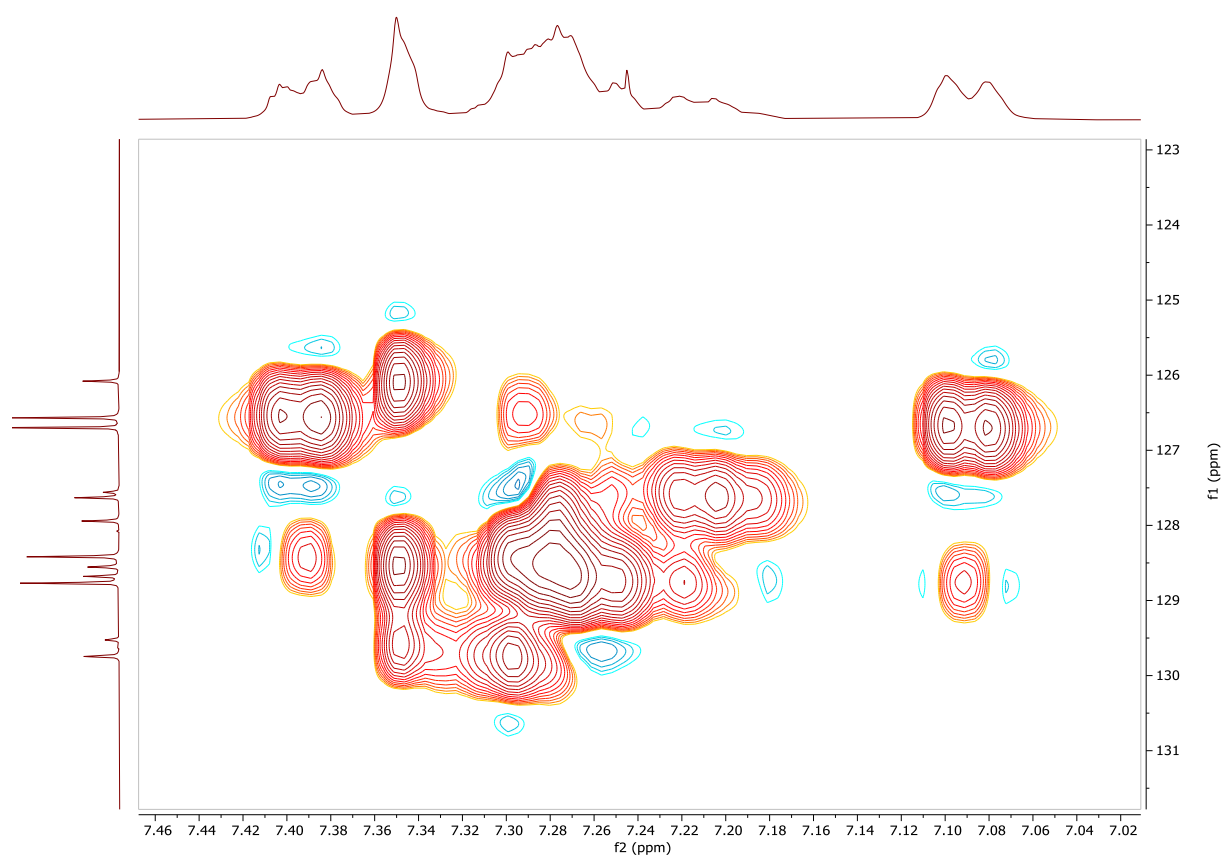

$^1\text{H}$ ,  $^{13}\text{C}$  HSQC in  $\text{CDCl}_3$  for **7b** (zoomed in)

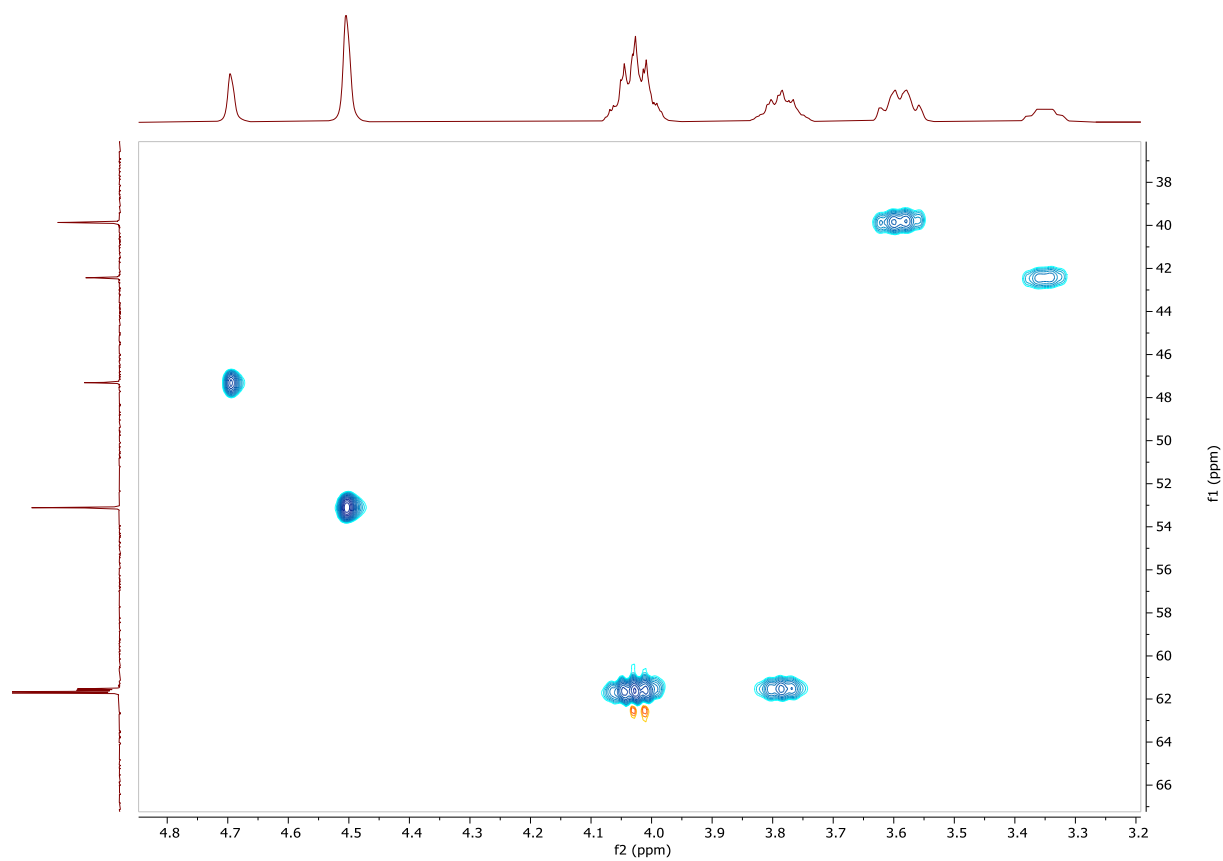

$^1\text{H}$ ,  $^{13}\text{C}$  HSQC in  $\text{CDCl}_3$  for **7b** (zoomed in)

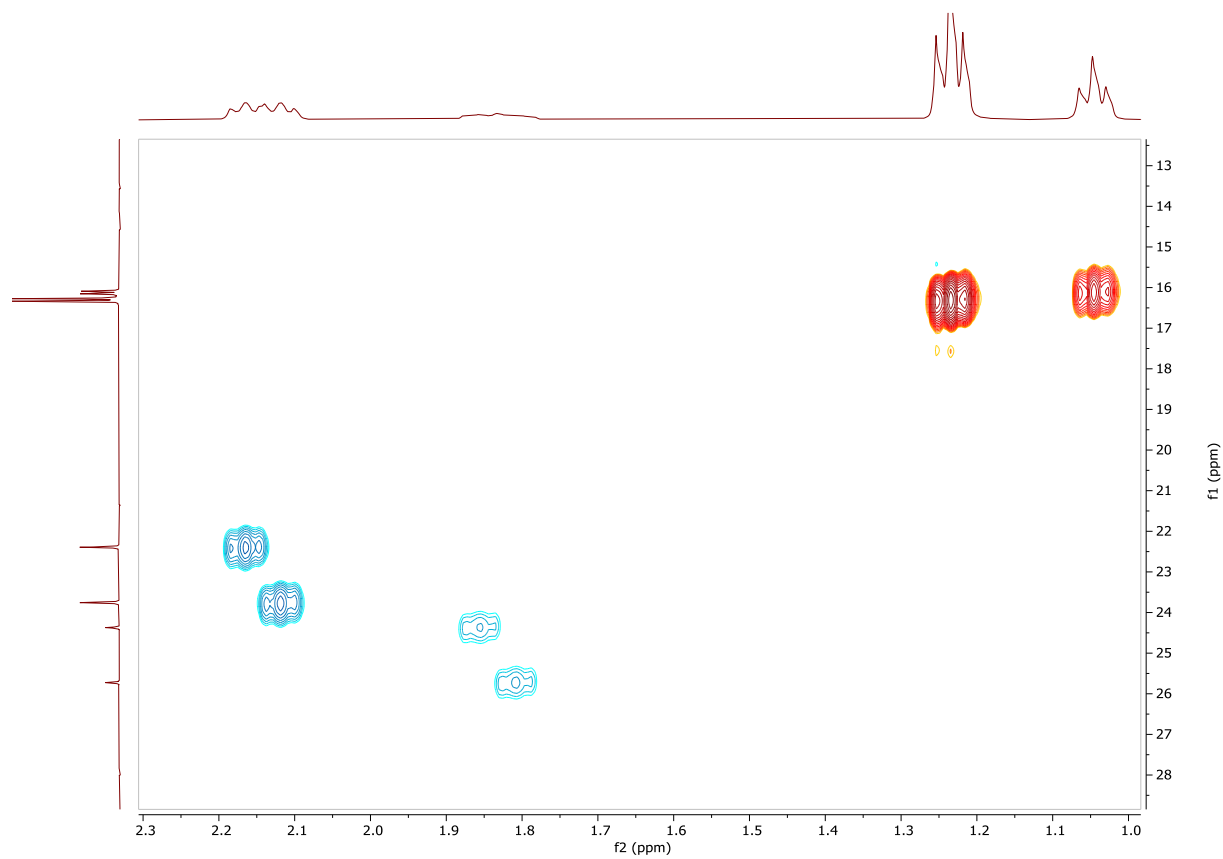

$^1\text{H}$ ,  $^{13}\text{C}$  HMBC in  $\text{CDCl}_3$  for **7b**

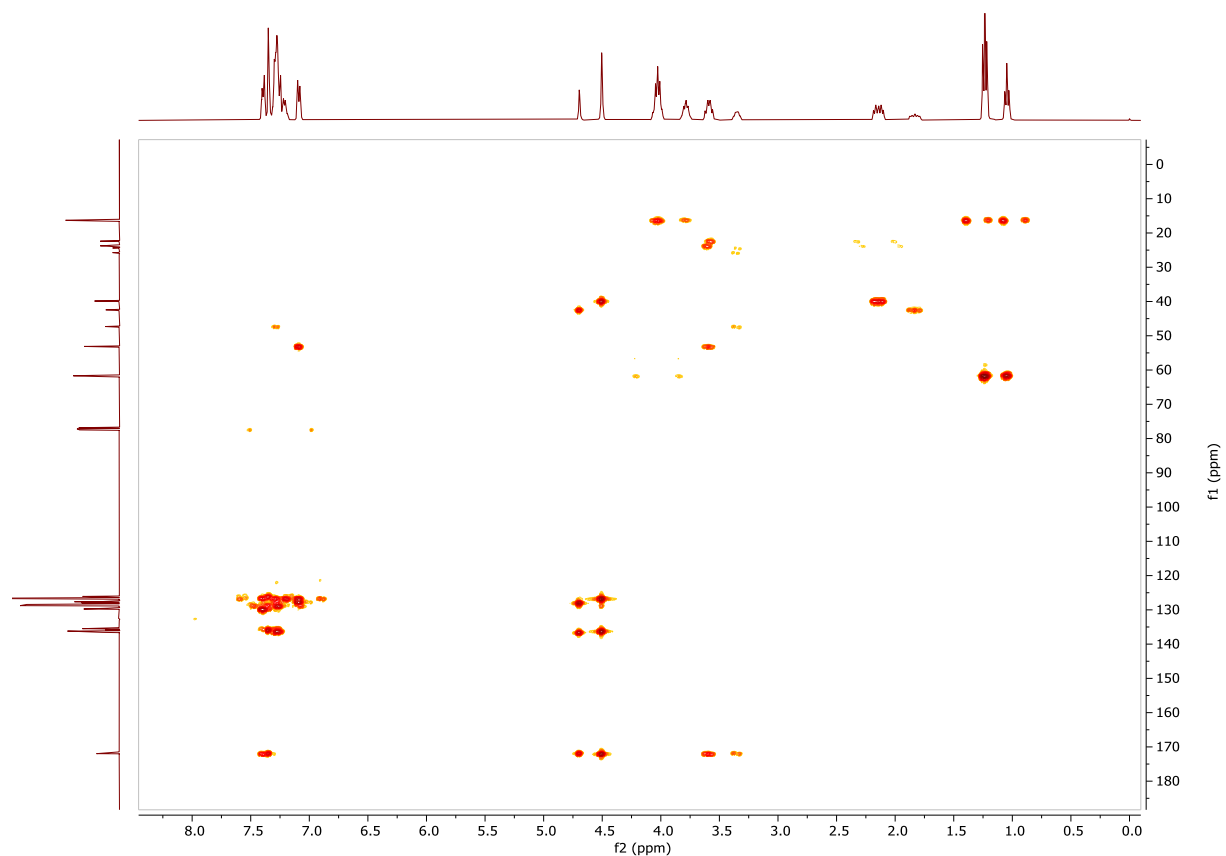

$^1\text{H}$ ,  $^{13}\text{C}$  HMBC in  $\text{CDCl}_3$  for **7b** (zoomed in)

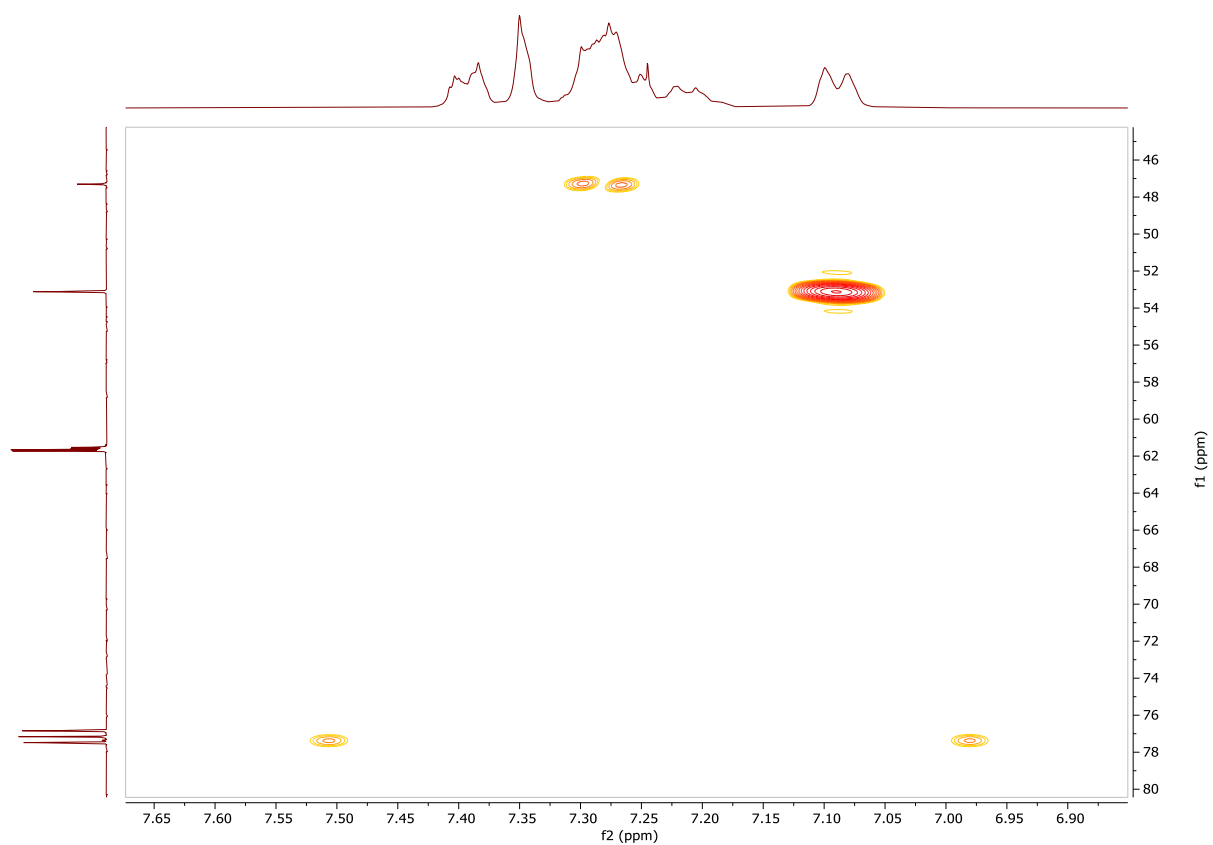

$^1\text{H}$ ,  $^{13}\text{C}$  HMBC in  $\text{CDCl}_3$  for **7b** (zoomed in)

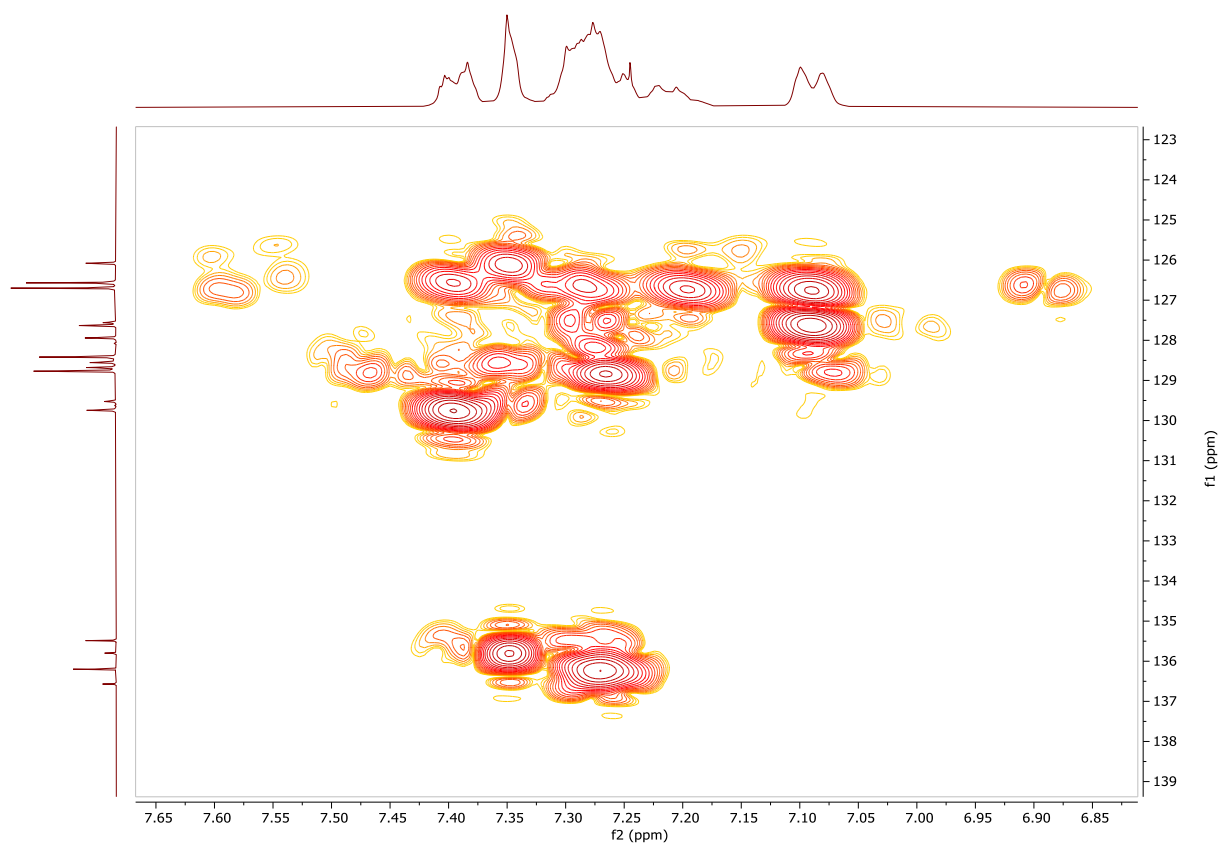

$^1\text{H}$ ,  $^{13}\text{C}$  HMBC in  $\text{CDCl}_3$  for **7b** (zoomed in)

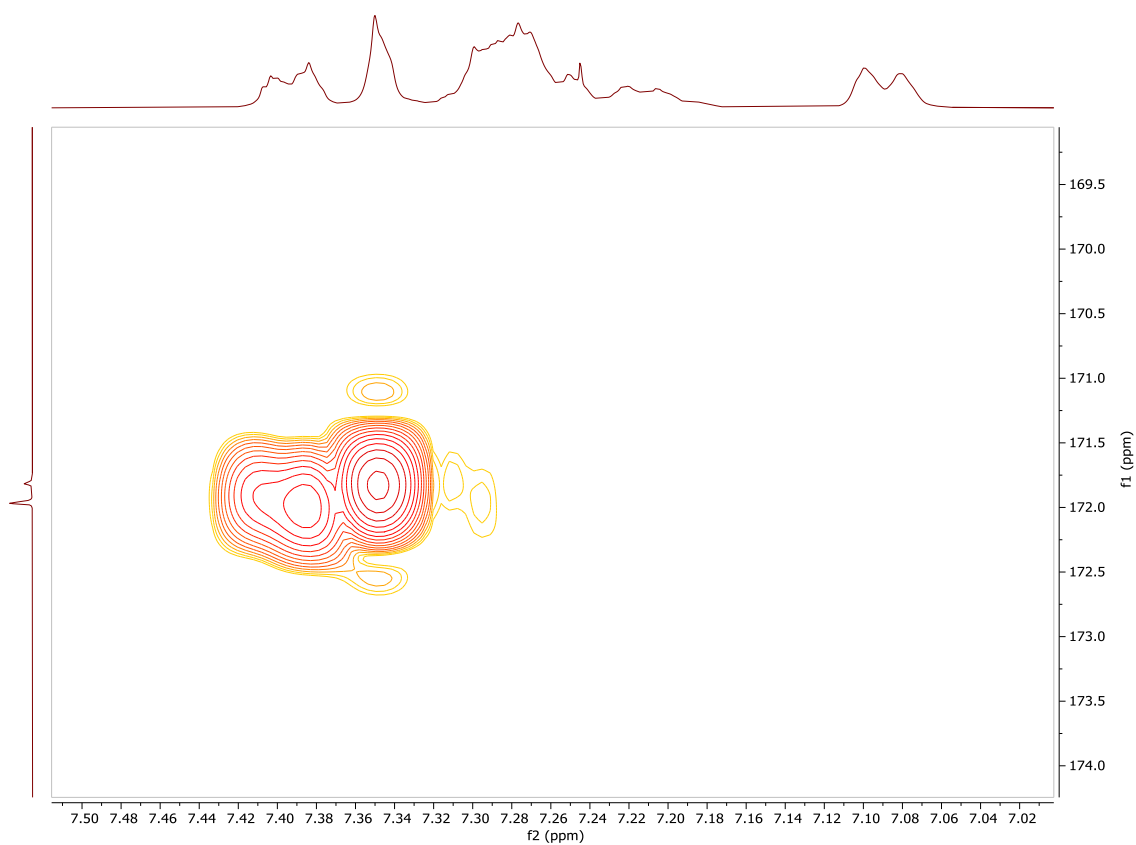



$^1\text{H}$ ,  $^{13}\text{C}$  HMBC in  $\text{CDCl}_3$  for **7b** (zoomed in)

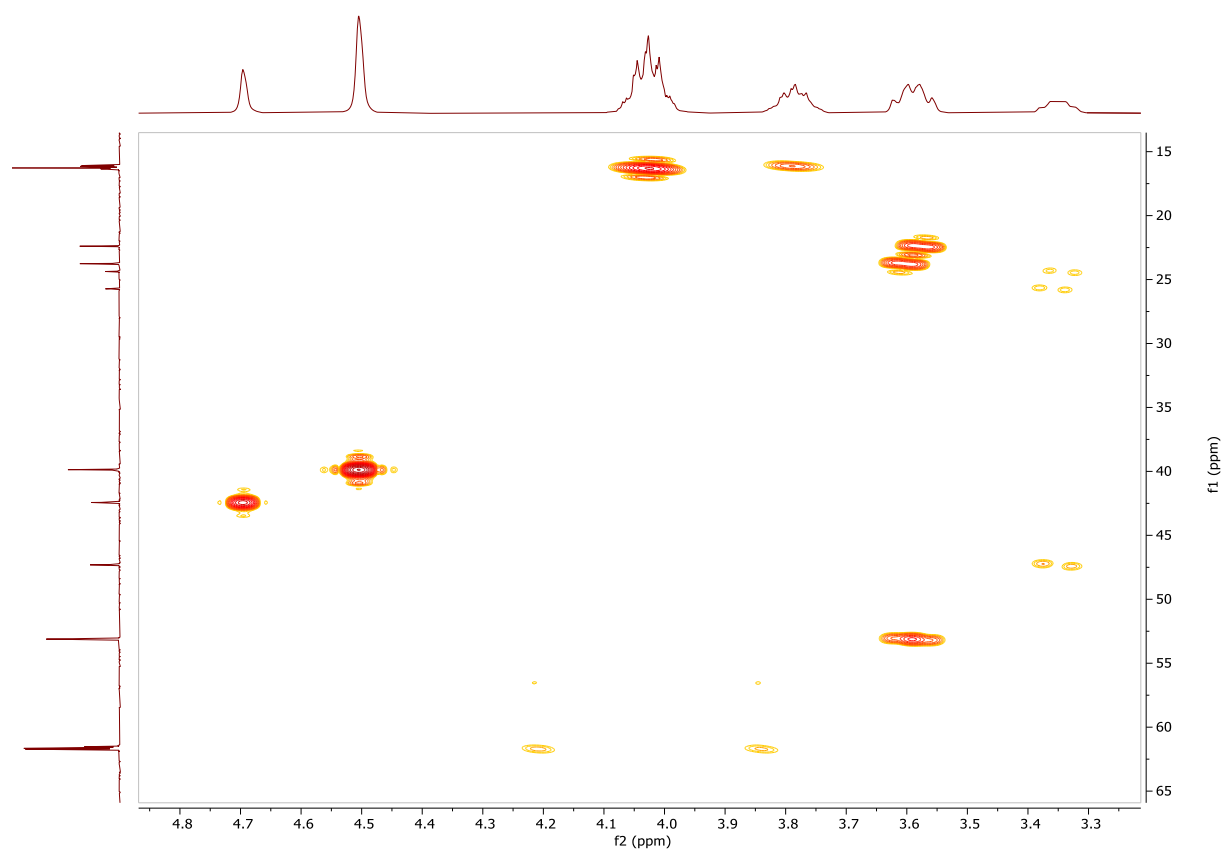

$^1\text{H}$ ,  $^{13}\text{C}$  HMBC in  $\text{CDCl}_3$  for **7b** (zoomed in)

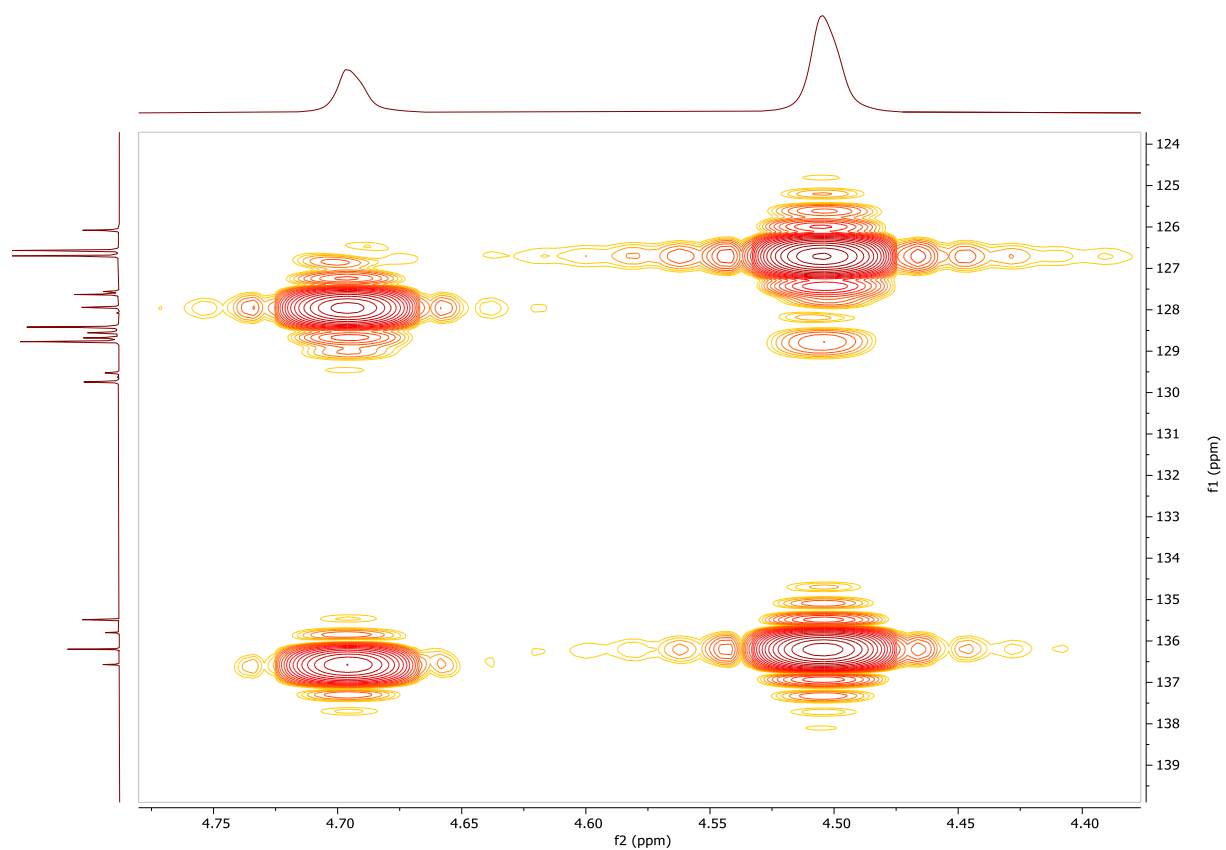

$^1\text{H}$ ,  $^{13}\text{C}$  HMBC in  $\text{CDCl}_3$  for **7b** (zoomed in)

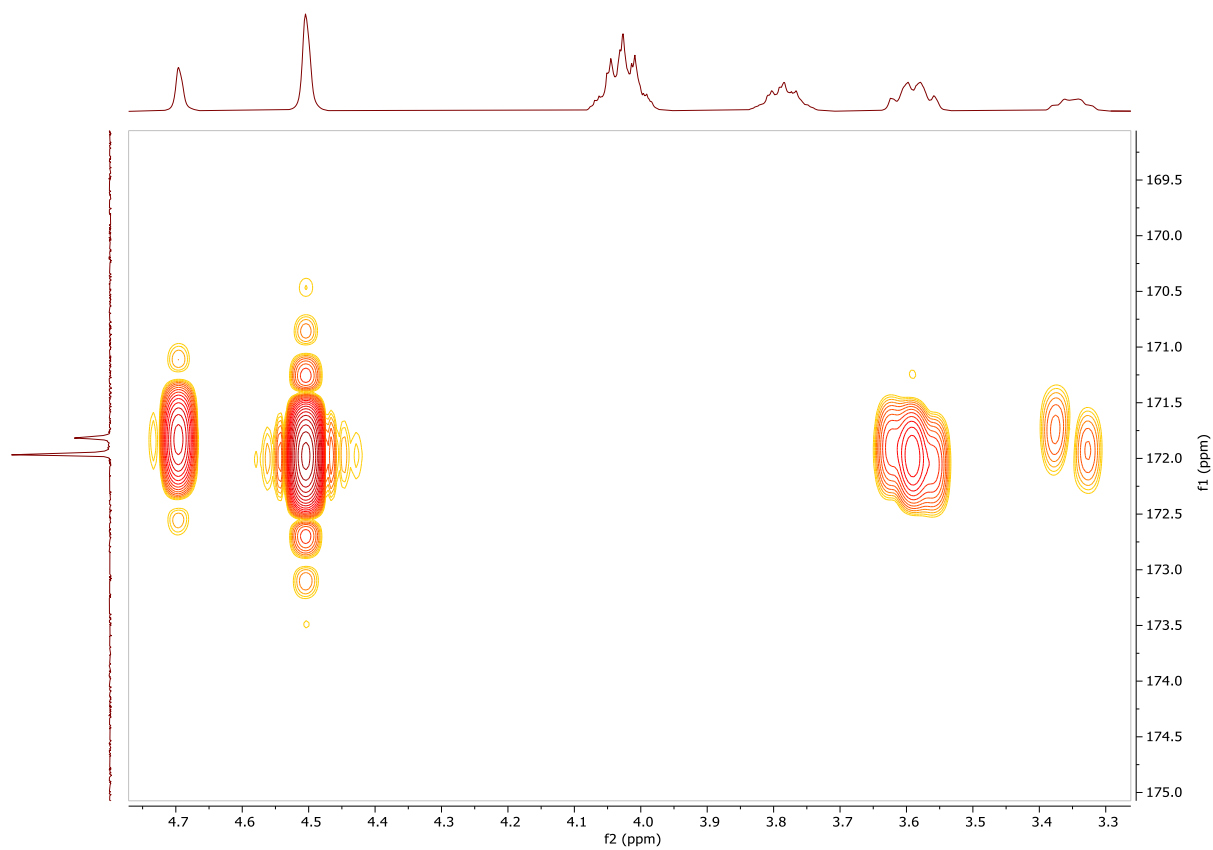

$^1\text{H}$ ,  $^{13}\text{C}$  HMBC in  $\text{CDCl}_3$  for **7b** (zoomed in)

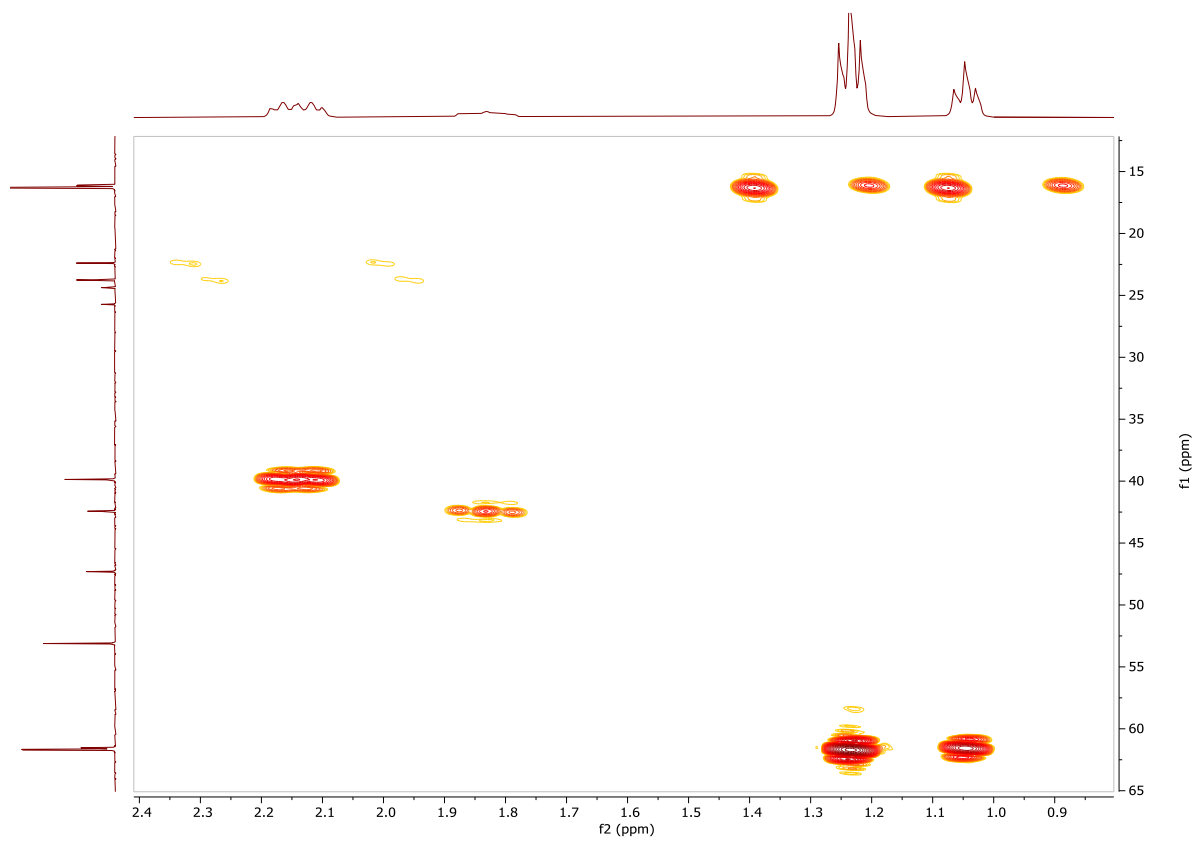

$^1\text{H}, ^1\text{H}$  NOESY in  $\text{CDCl}_3$  for **7b**

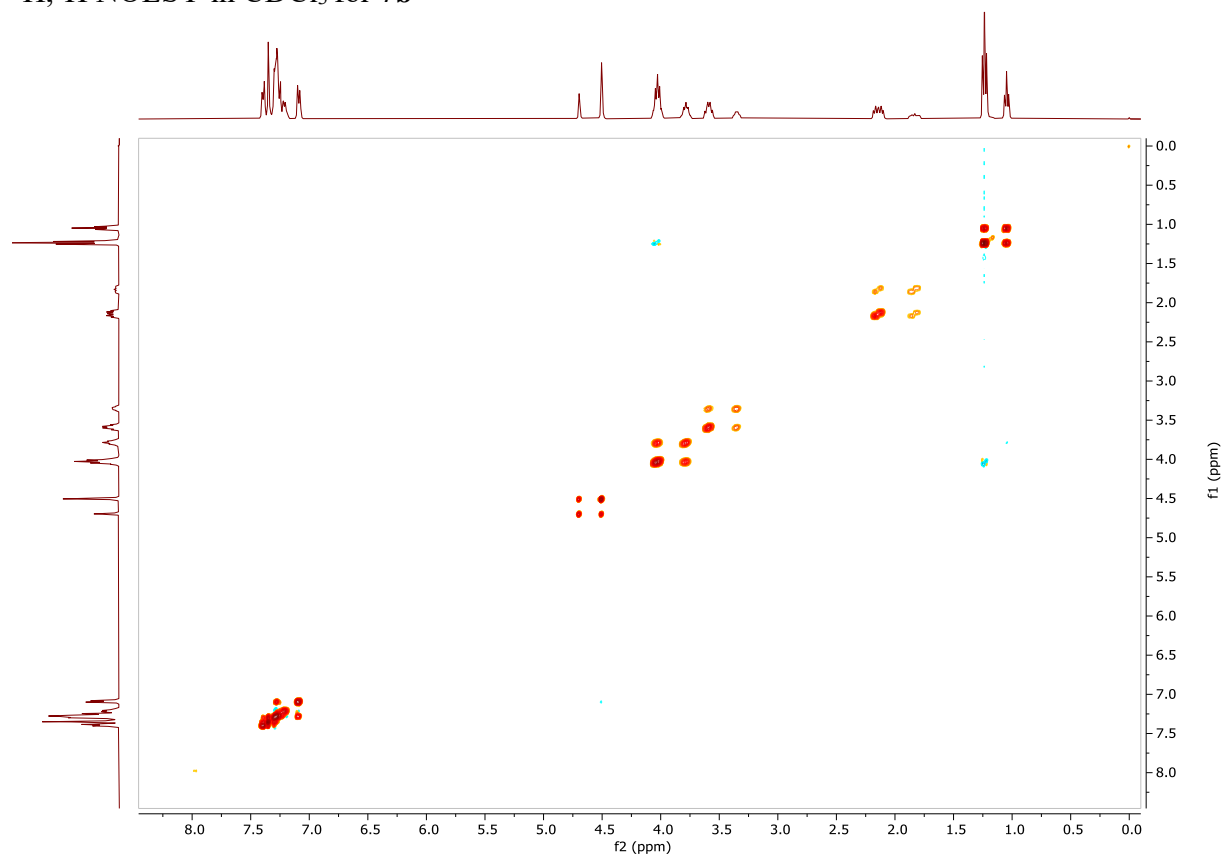

$^1\text{H}, ^1\text{H}$  NOESY in  $\text{CDCl}_3$  for **7b** (zoomed in)

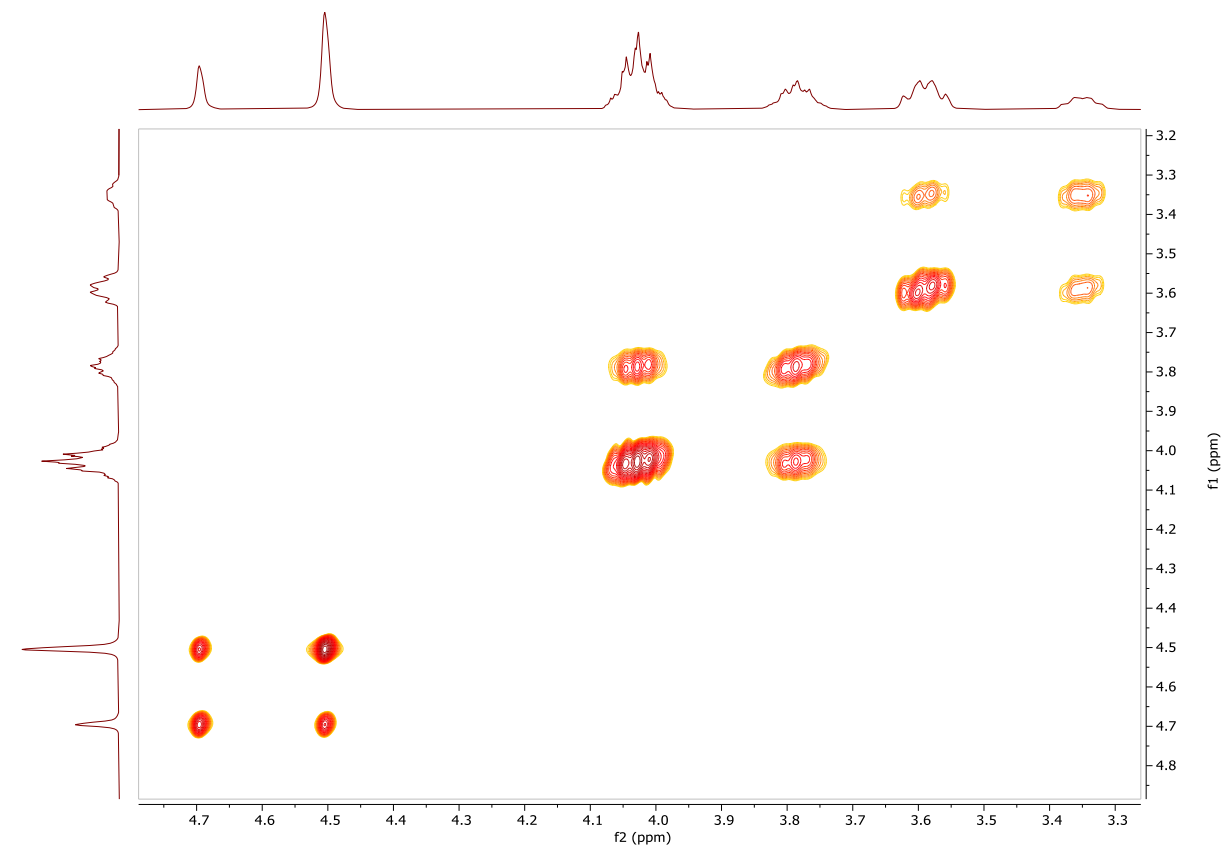

$^1\text{H}$ ,  $^1\text{H}$  NOESY in  $\text{CDCl}_3$  for **7b** (zoomed in)

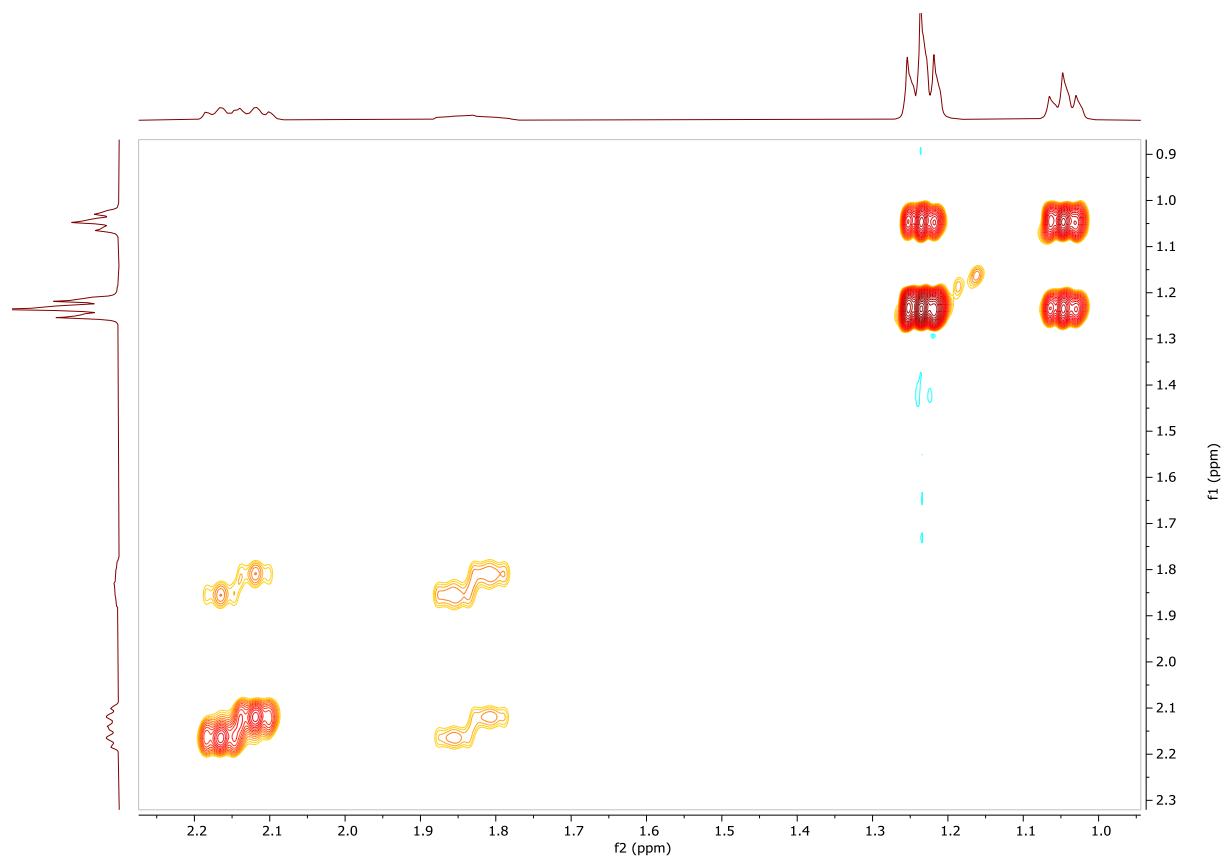

$^1\text{H}$ ,  $^1\text{H}$  NOESY in  $\text{CDCl}_3$  for **7b** (zoomed in)

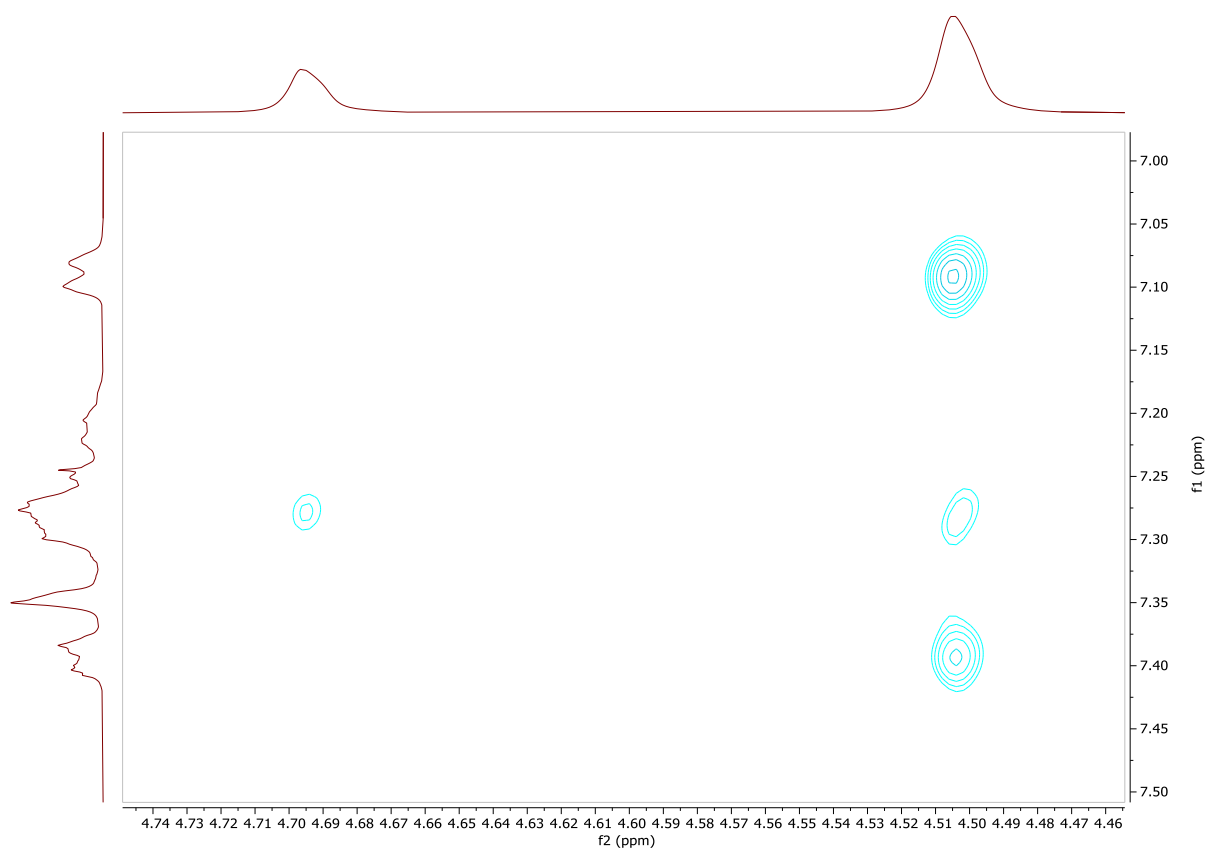

$^1\text{H}$ ,  $^{15}\text{N}$  HMBC in  $\text{CDCl}_3$  for **7b**

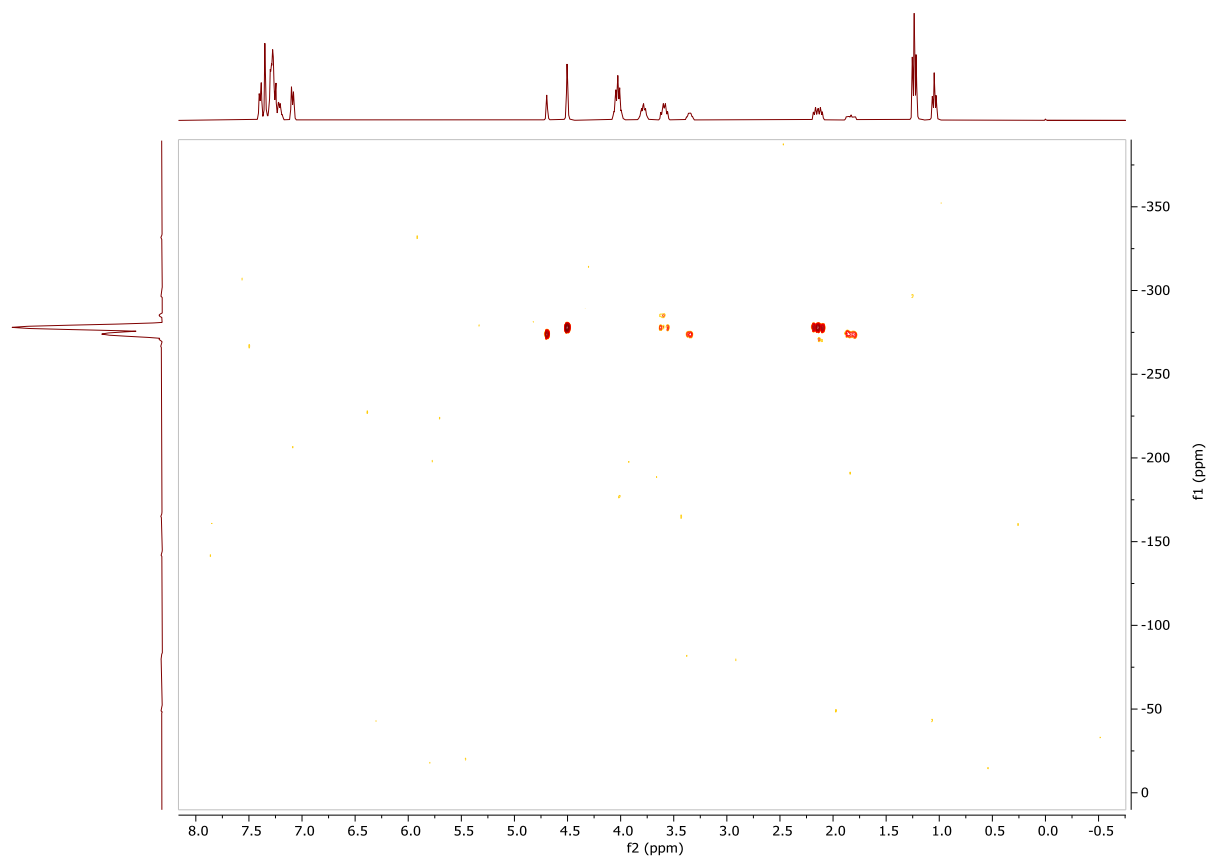

$^1\text{H}$ ,  $^{15}\text{N}$  HMBC in  $\text{CDCl}_3$  for **7b** (zoomed in)

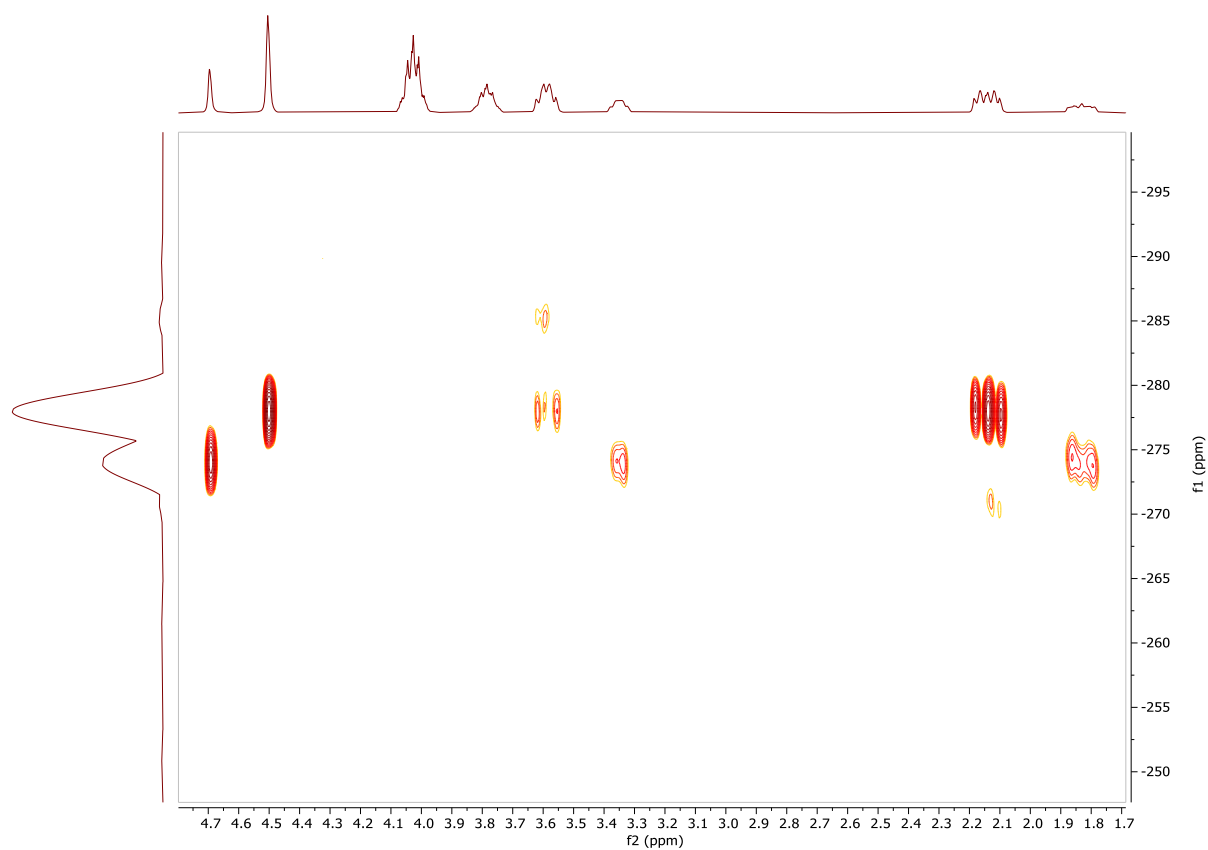

$^1\text{H}$ ,  $^1\text{H}$ -COSY NMR spectrum of **8a** in  $\text{CDCl}_3$

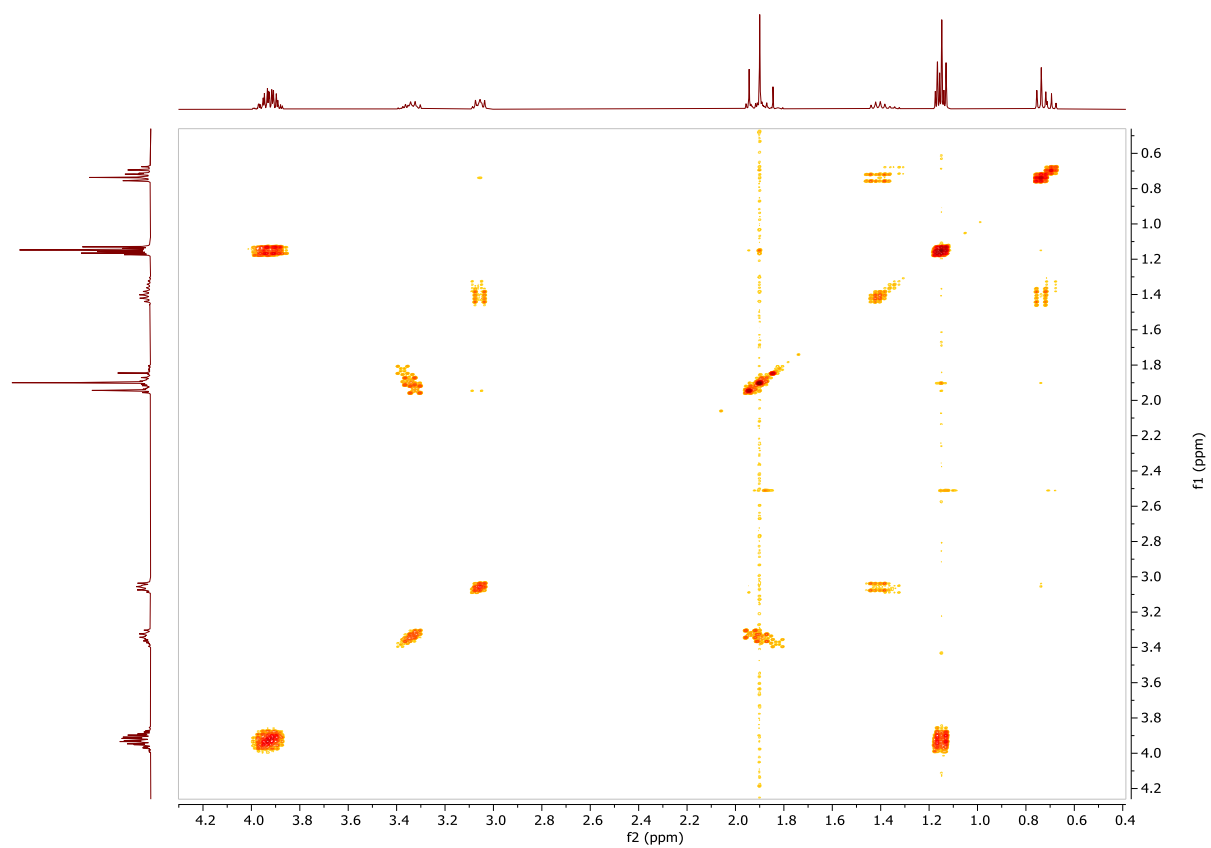

$^1\text{H}$ ,  $^1\text{H}$ -COSY NMR spectrum of **8a** in  $\text{CDCl}_3$  (zoomed in)

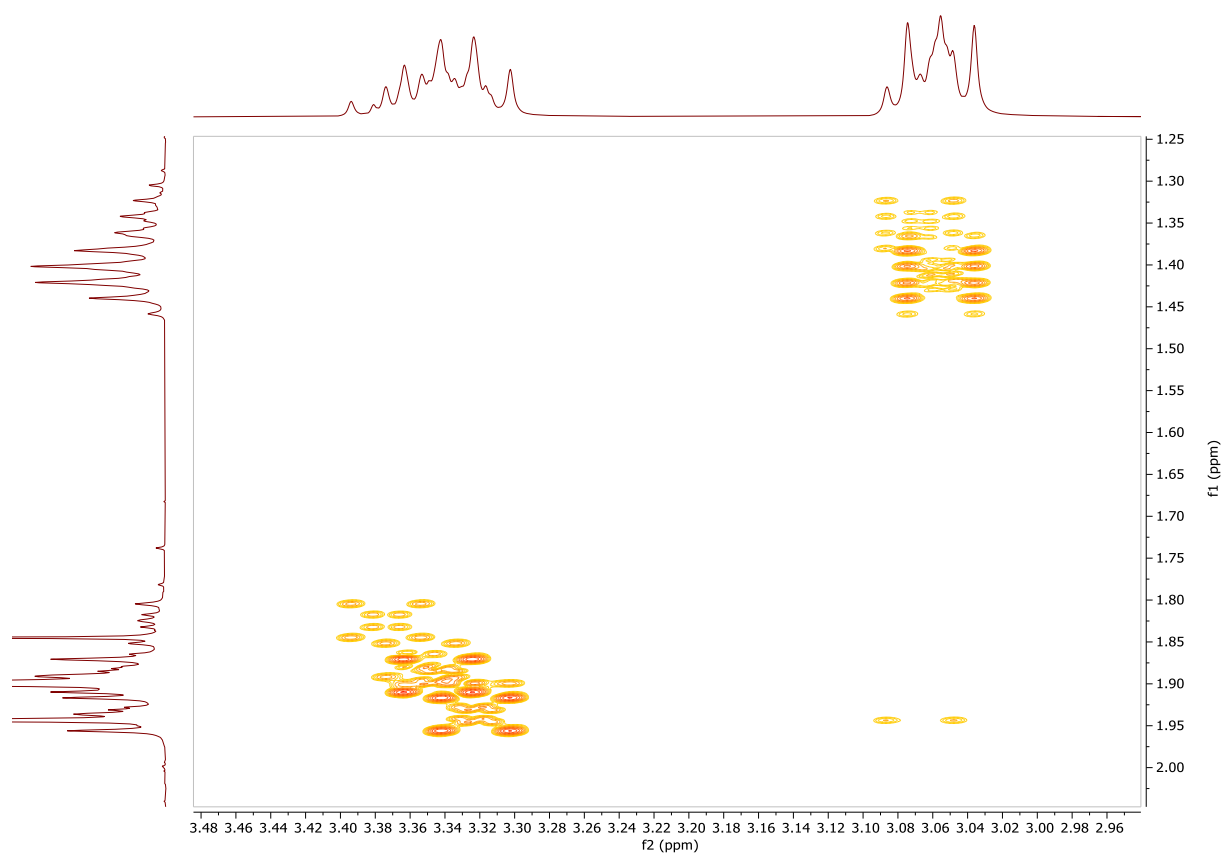

$^1\text{H}, ^1\text{H}$ -COSY NMR spectrum of **8a** in  $\text{CDCl}_3$  (zoomed in)

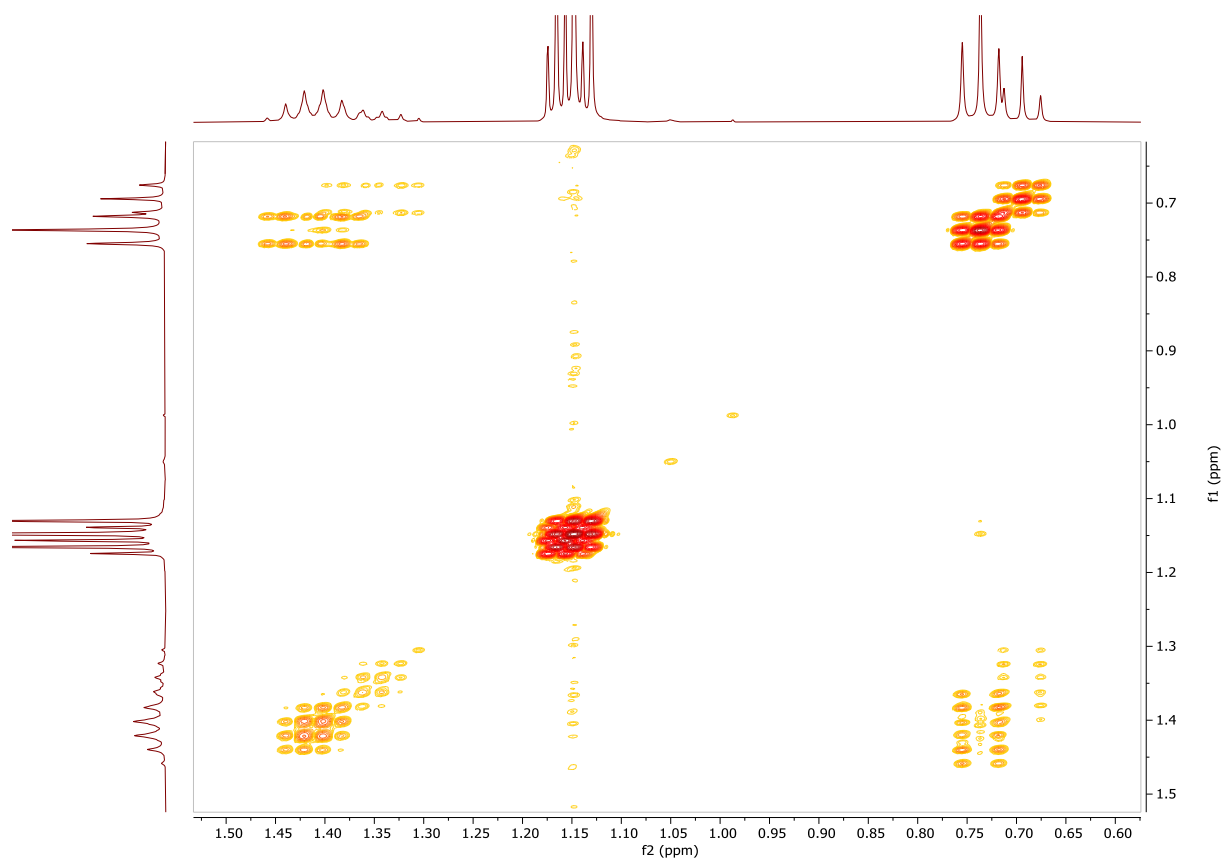

$^1\text{H}, ^{13}\text{C}$ -HSQC NMR spectrum of **8a** in  $\text{CDCl}_3$

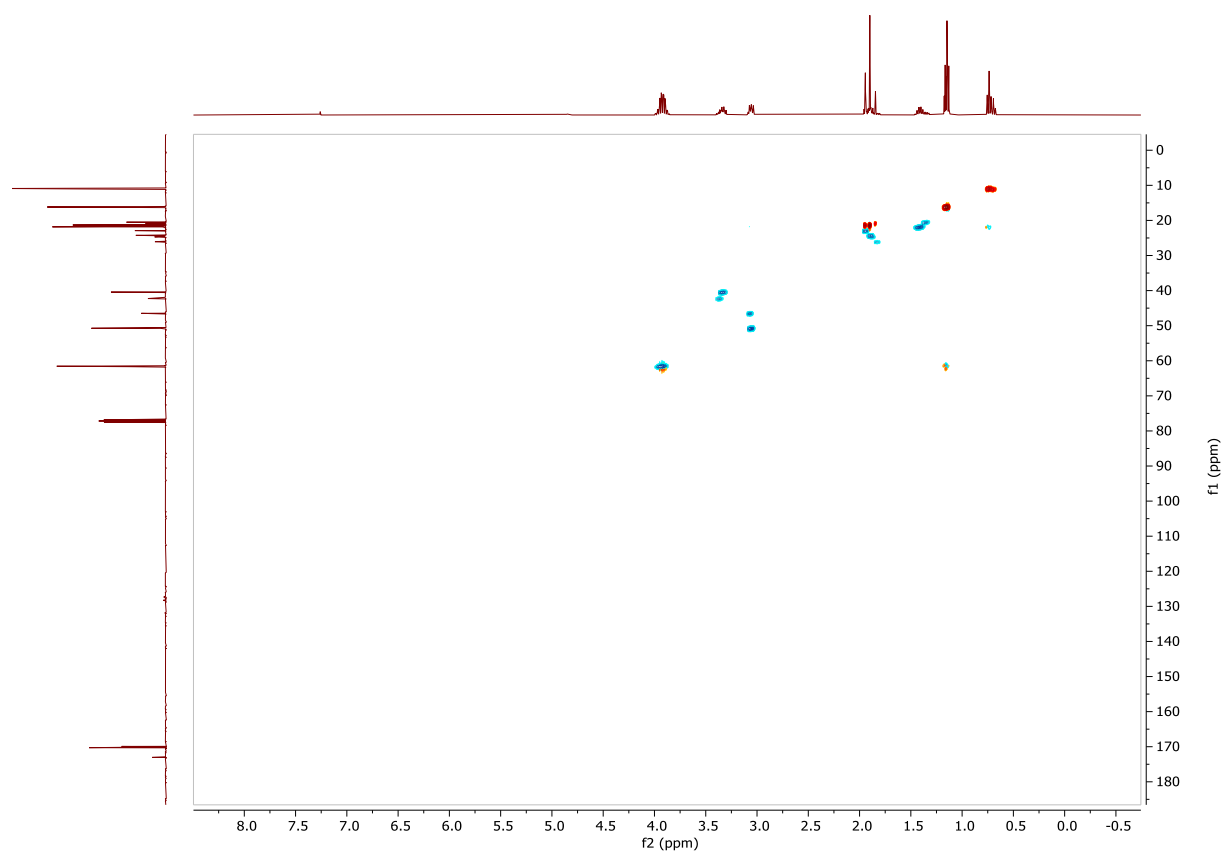

$^1\text{H}$ ,  $^{13}\text{C}$ -HSQC NMR spectrum of **8a** in  $\text{CDCl}_3$  (zoomed in)

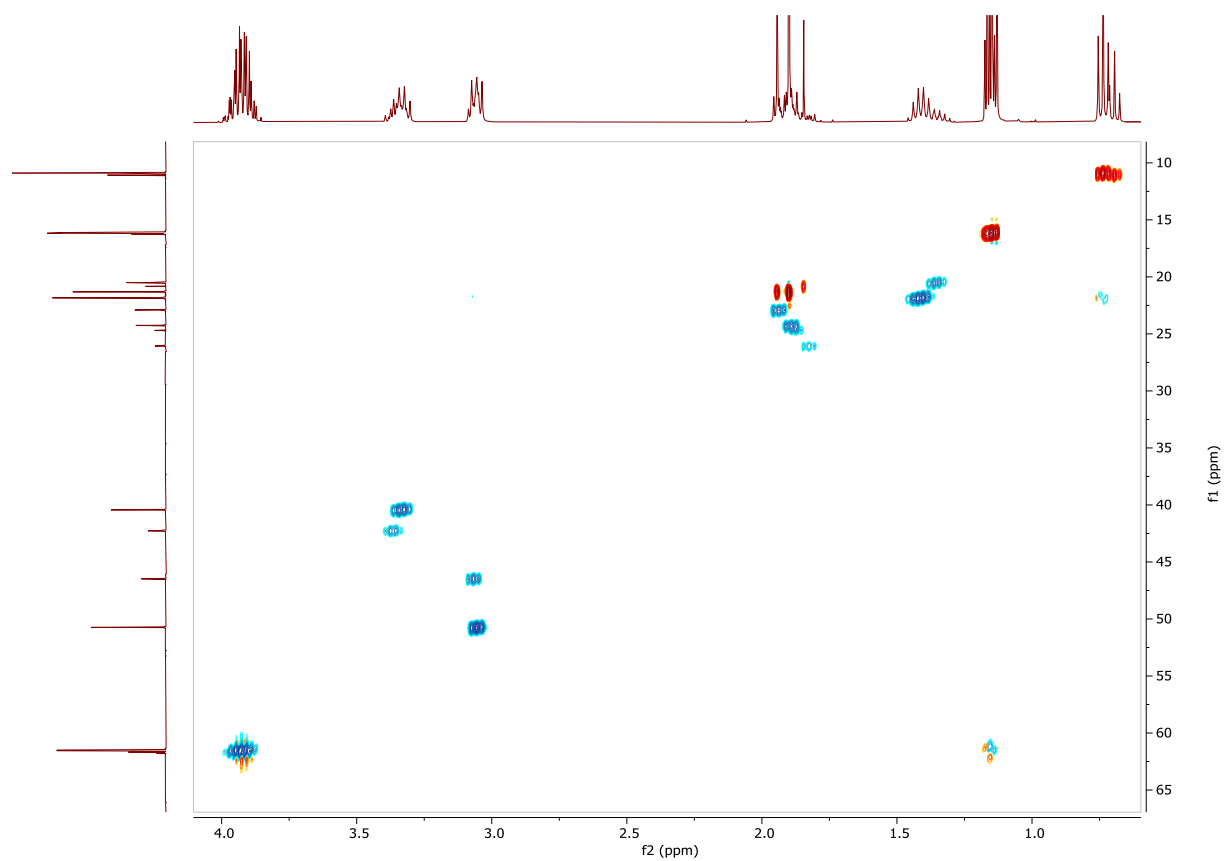

$^1\text{H}$ ,  $^{13}\text{C}$ -HSQC NMR spectrum of **8a** in  $\text{CDCl}_3$  (zoomed in)

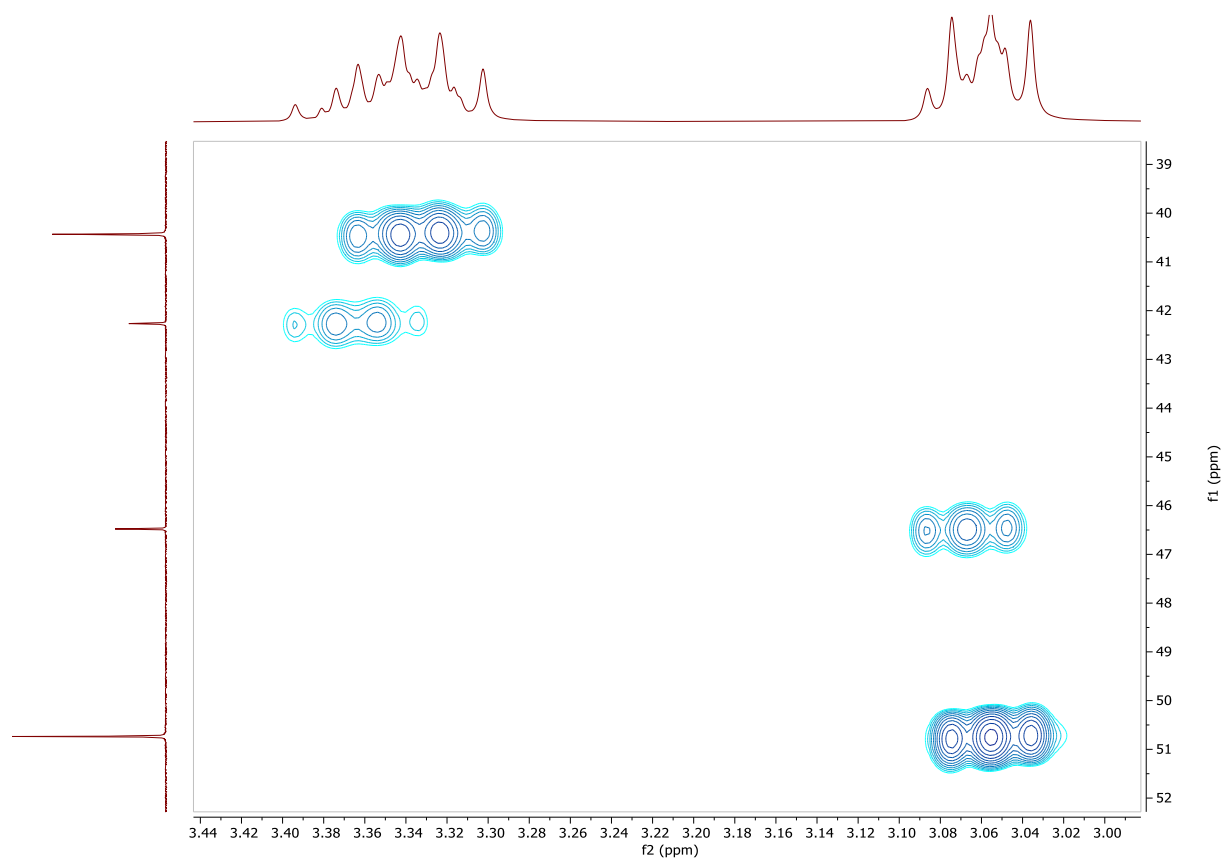



$^1\text{H}$ ,  $^{13}\text{C}$ -HSQC NMR spectrum of **8a** in  $\text{CDCl}_3$  (zoomed in)

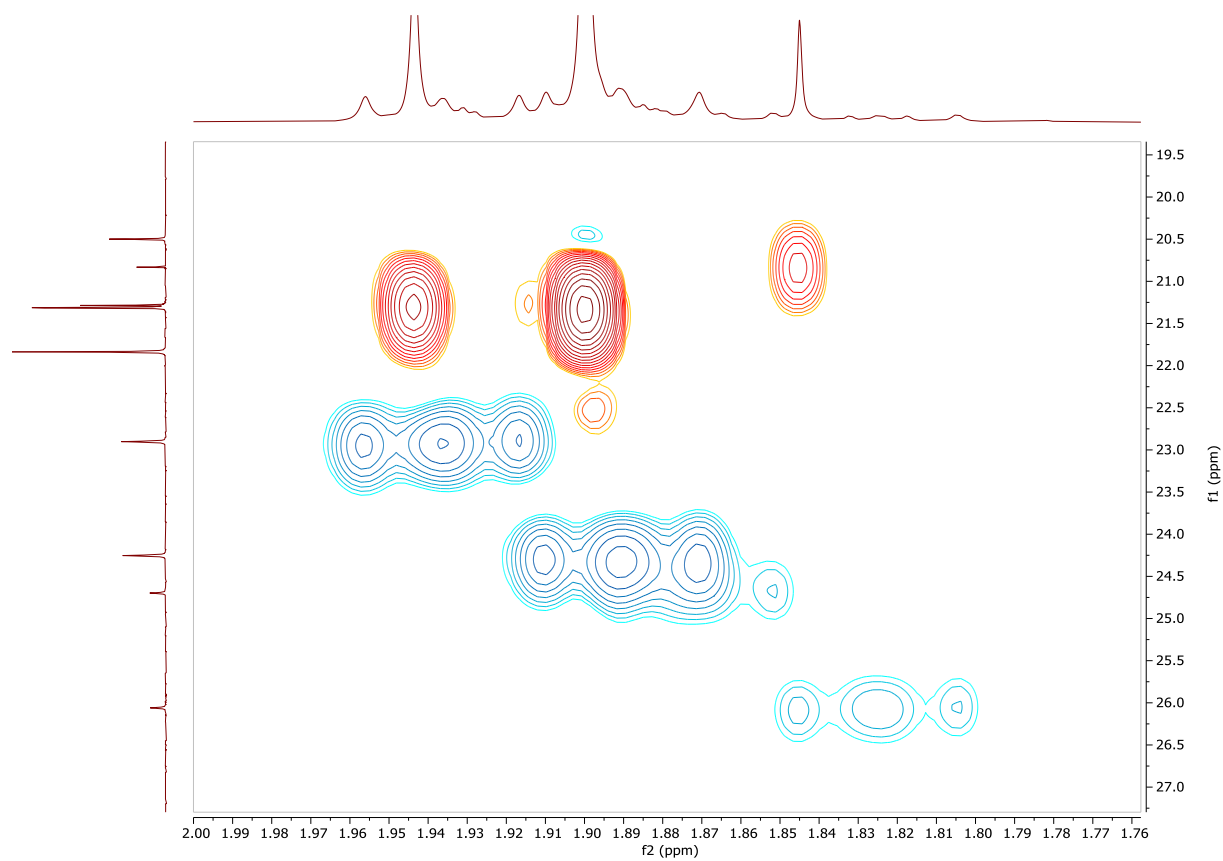

$^1\text{H}$ ,  $^{13}\text{C}$ -HSQC NMR spectrum of **8a** in  $\text{CDCl}_3$  (zoomed in)

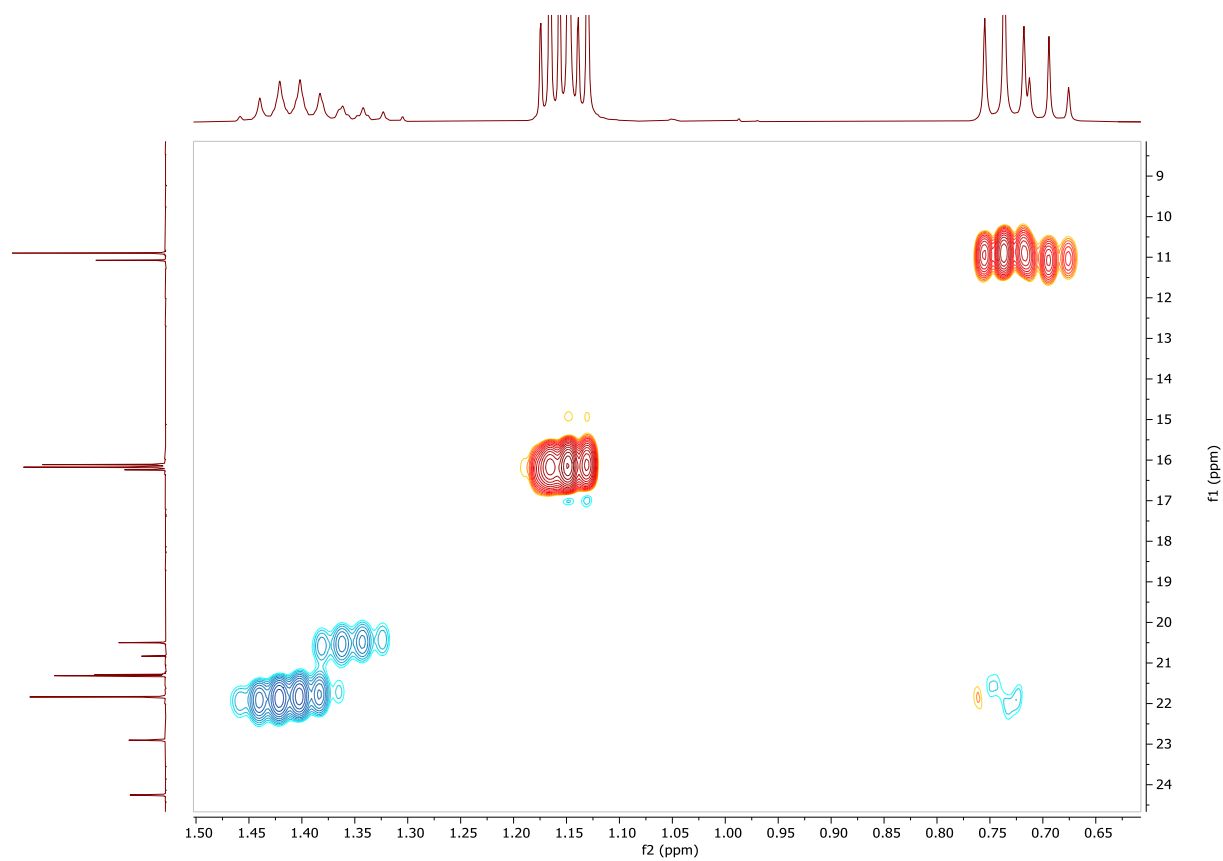

$^1\text{H}$ ,  $^{13}\text{C}$ -HMBC NMR spectrum of **8a** in  $\text{CDCl}_3$

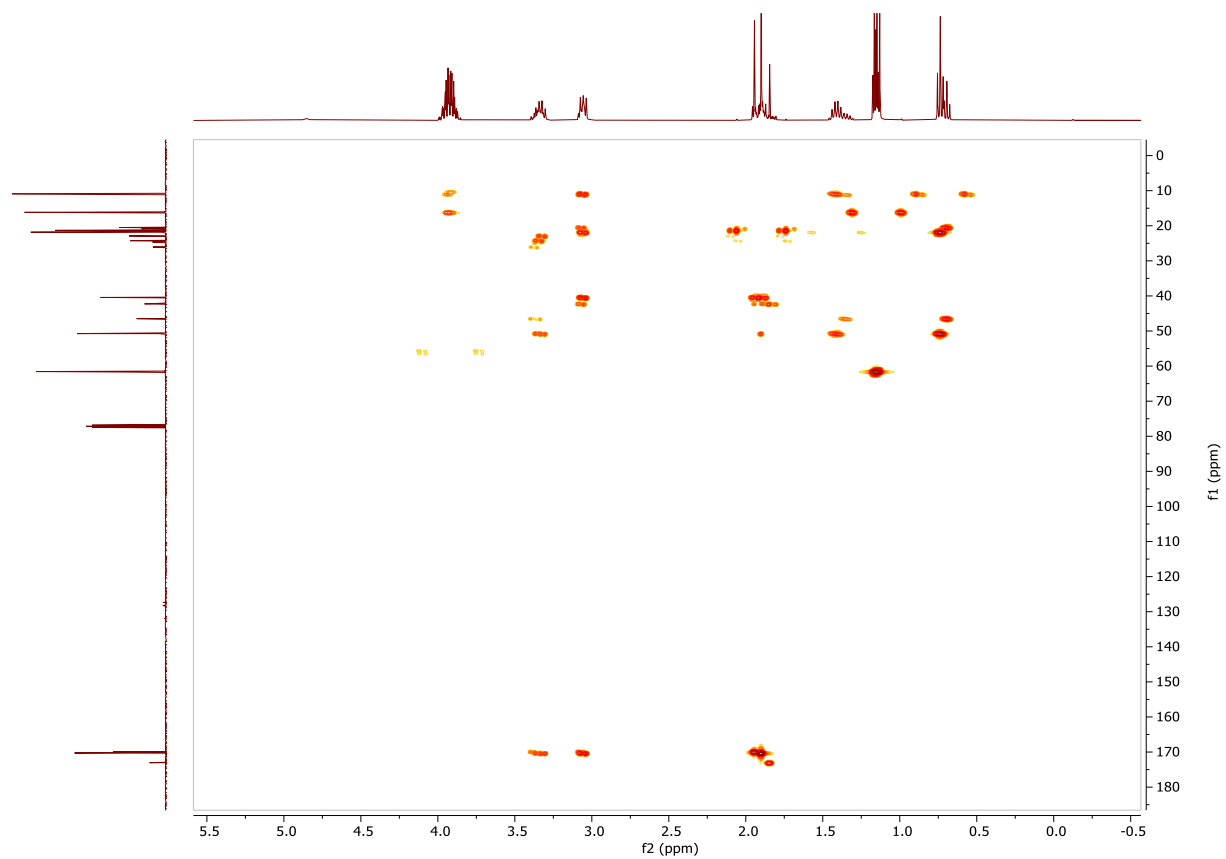

$^1\text{H}$ ,  $^{13}\text{C}$ -HMBC NMR spectrum of **8a** in  $\text{CDCl}_3$  (zoomed in)

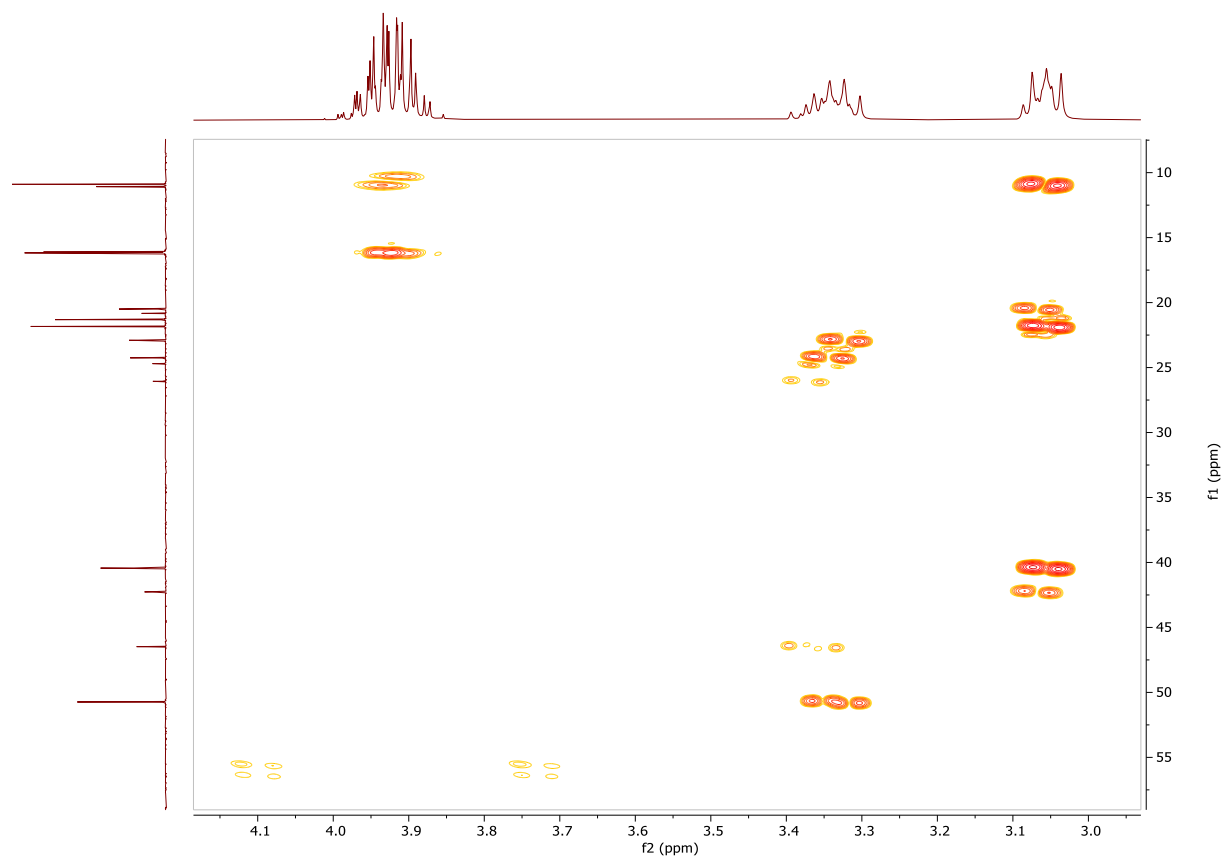

$^1\text{H}$ ,  $^{13}\text{C}$ -HMBC NMR spectrum of **8a** in  $\text{CDCl}_3$  (zoomed in)

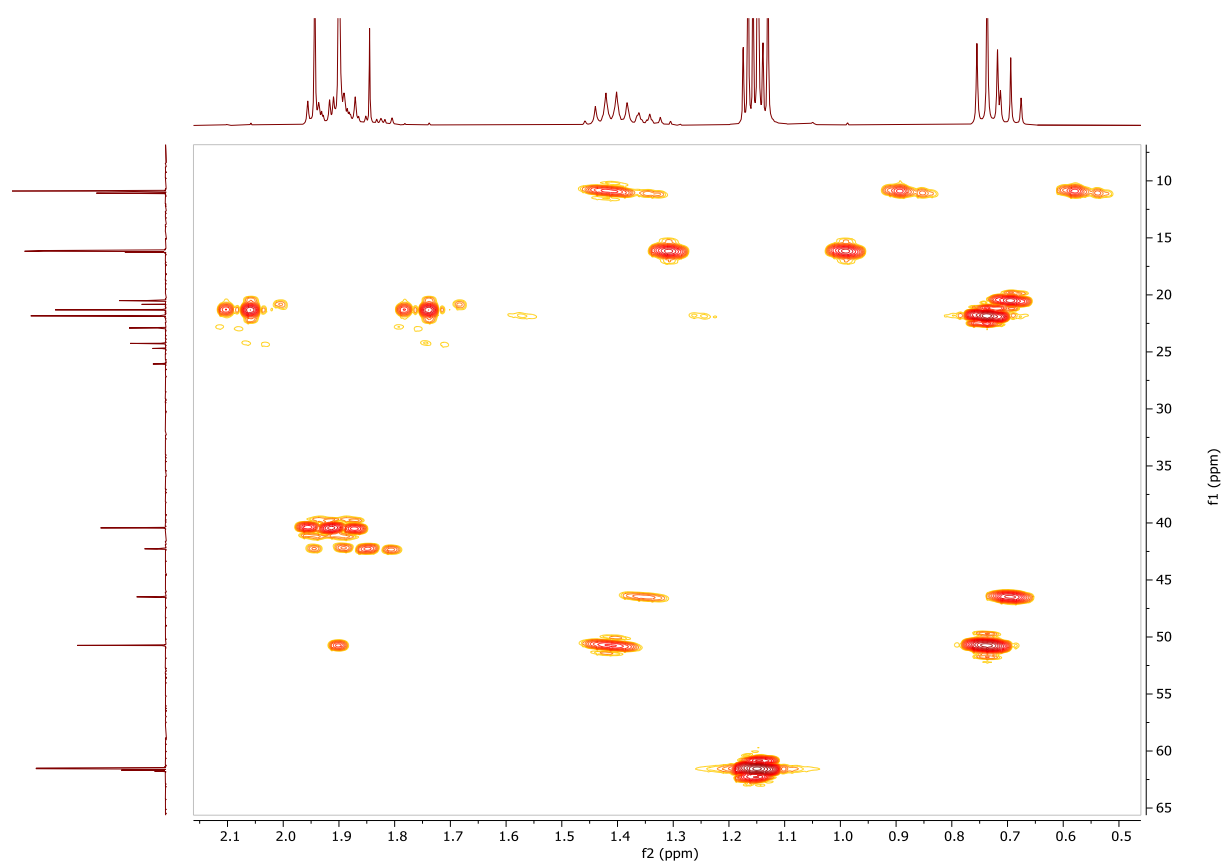

$^1\text{H}$ ,  $^{13}\text{C}$ -HMBC NMR spectrum of **8a** in  $\text{CDCl}_3$  (zoomed in)

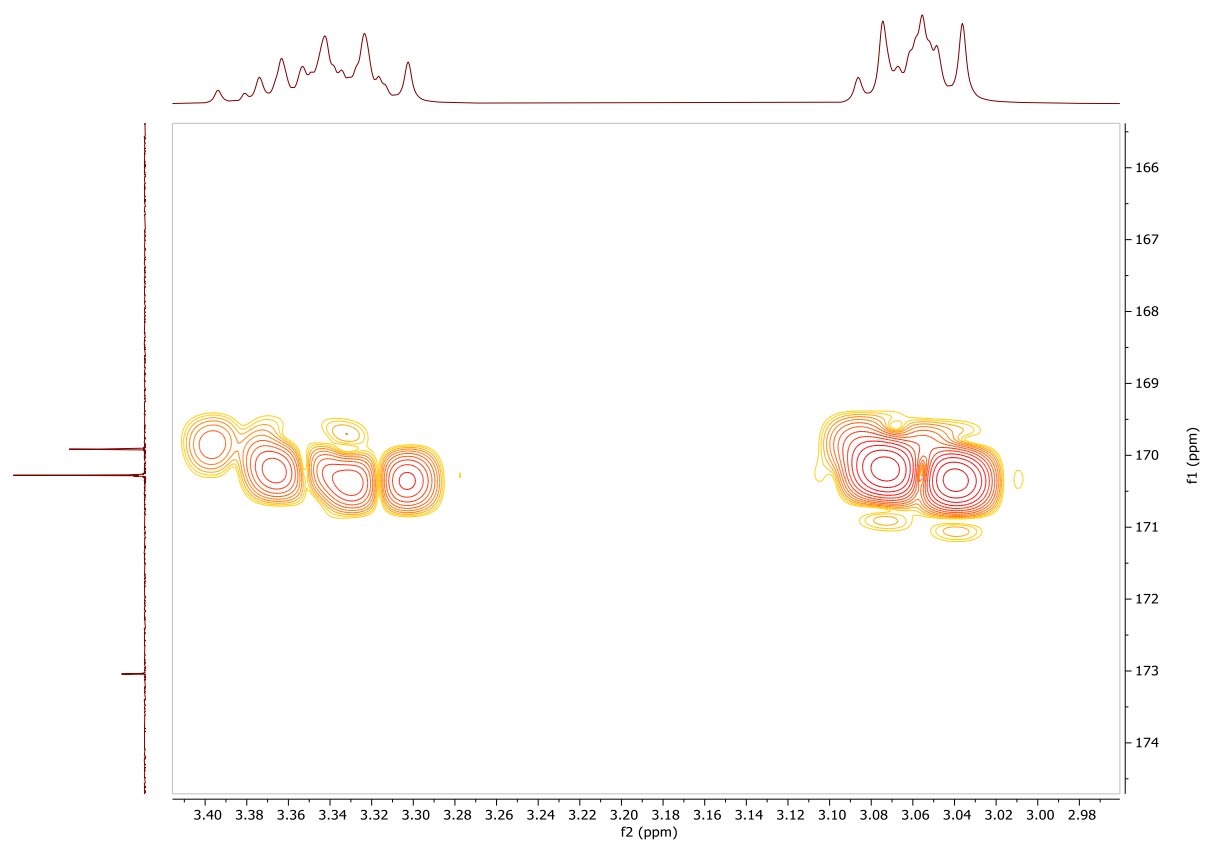

$^1\text{H}$ ,  $^{13}\text{C}$ -HMBC NMR spectrum of **8a** in  $\text{CDCl}_3$  (zoomed in)

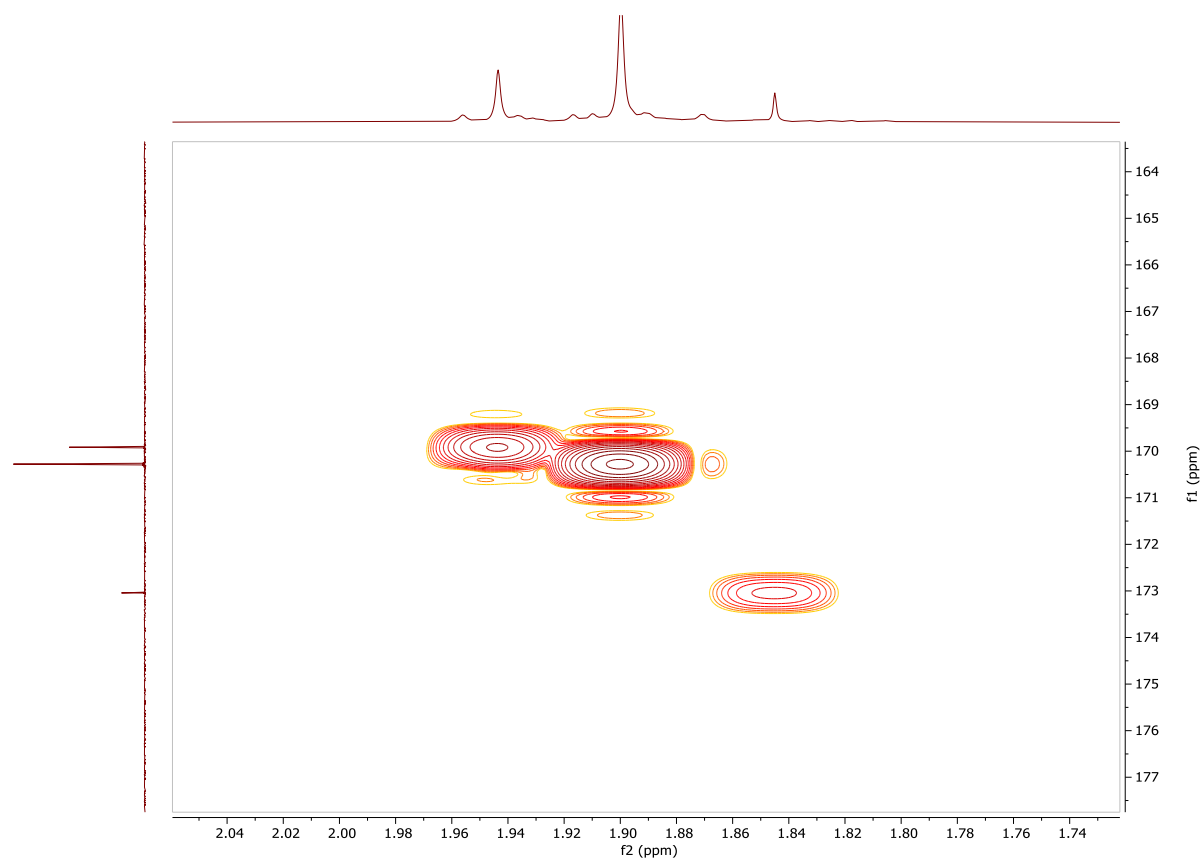

$^1\text{H}$ ,  $^1\text{H}$ -NOESY NMR spectrum of **8a** in  $\text{CDCl}_3$

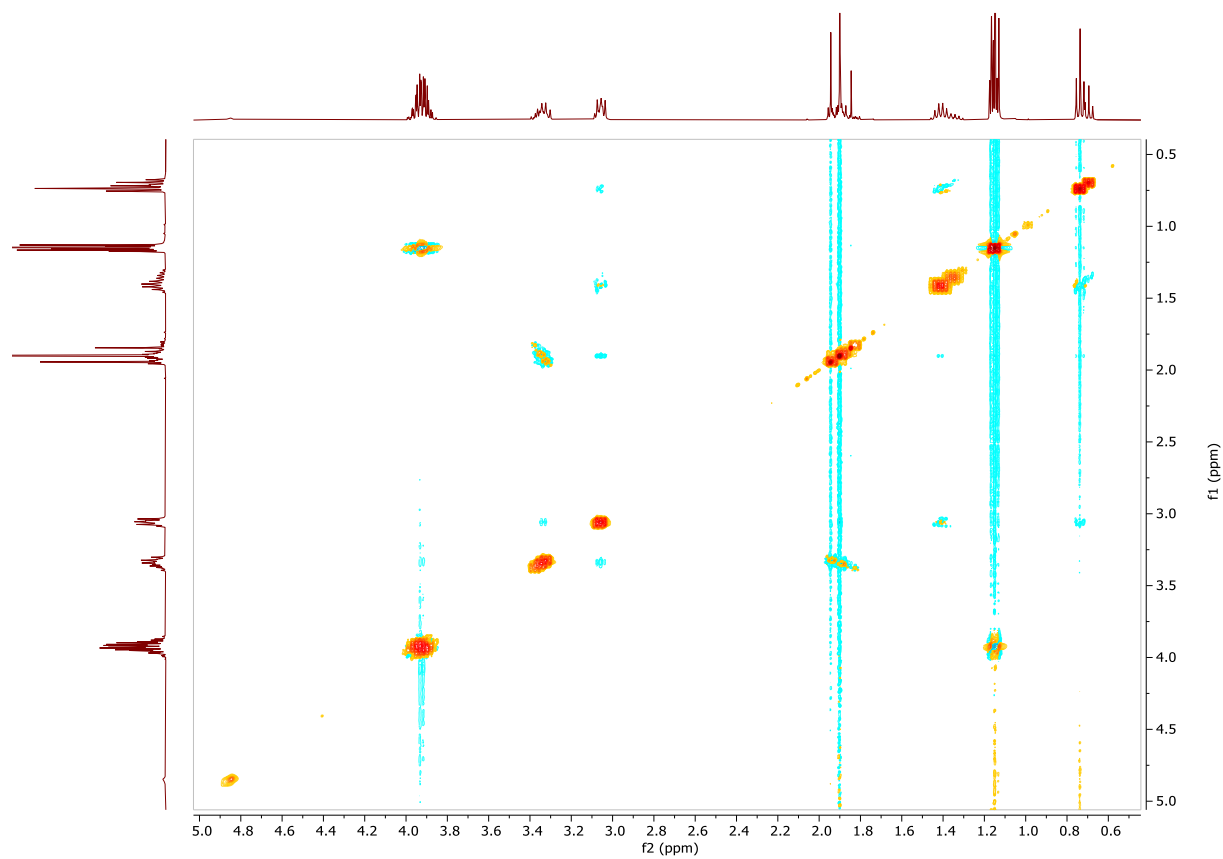

$^1\text{H}$ ,  $^{15}\text{N}$ -HMBC NMR spectrum of **8a** in  $\text{CDCl}_3$

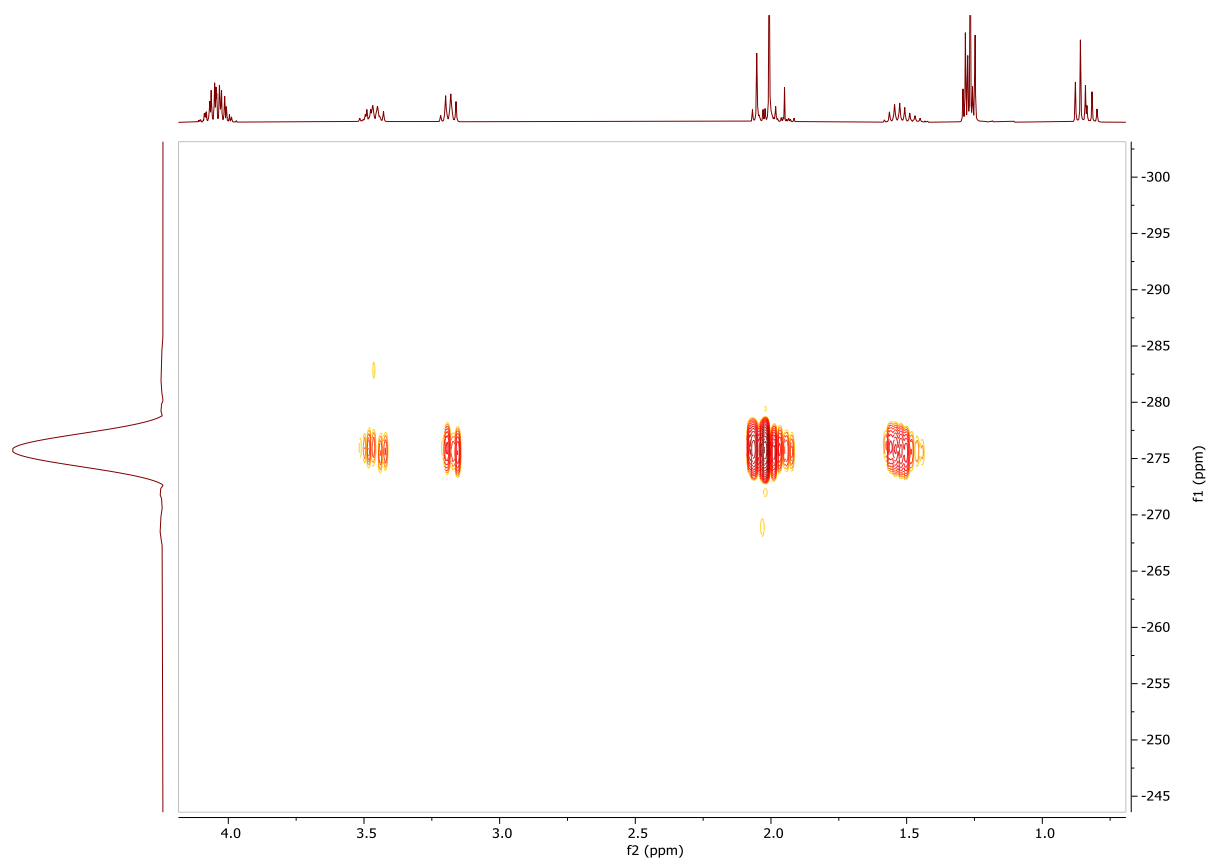

$^1\text{H}$ ,  $^1\text{H}$ -COSY NMR spectrum of **8b** in  $\text{CDCl}_3$

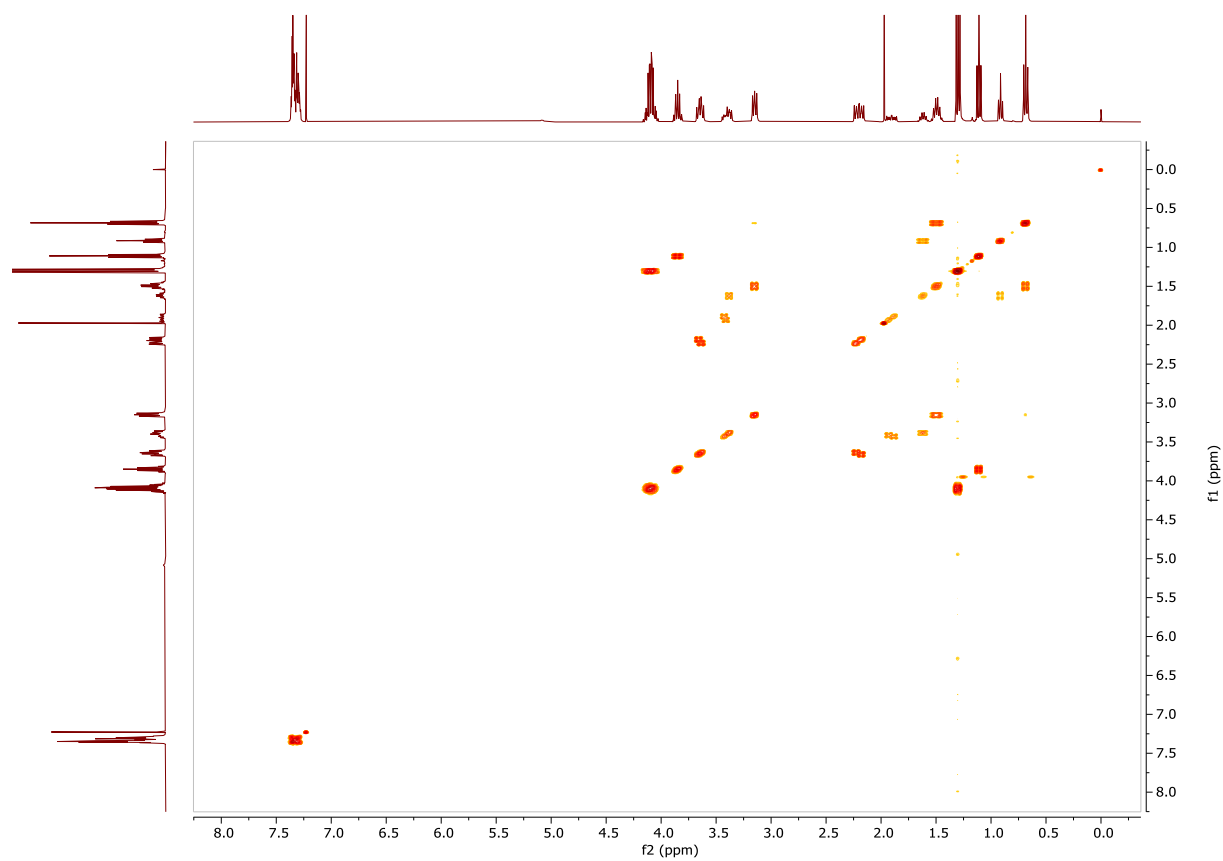

$^1\text{H}, ^1\text{H}$ -COSY NMR spectrum of **8b** in  $\text{CDCl}_3$  (zoomed in)

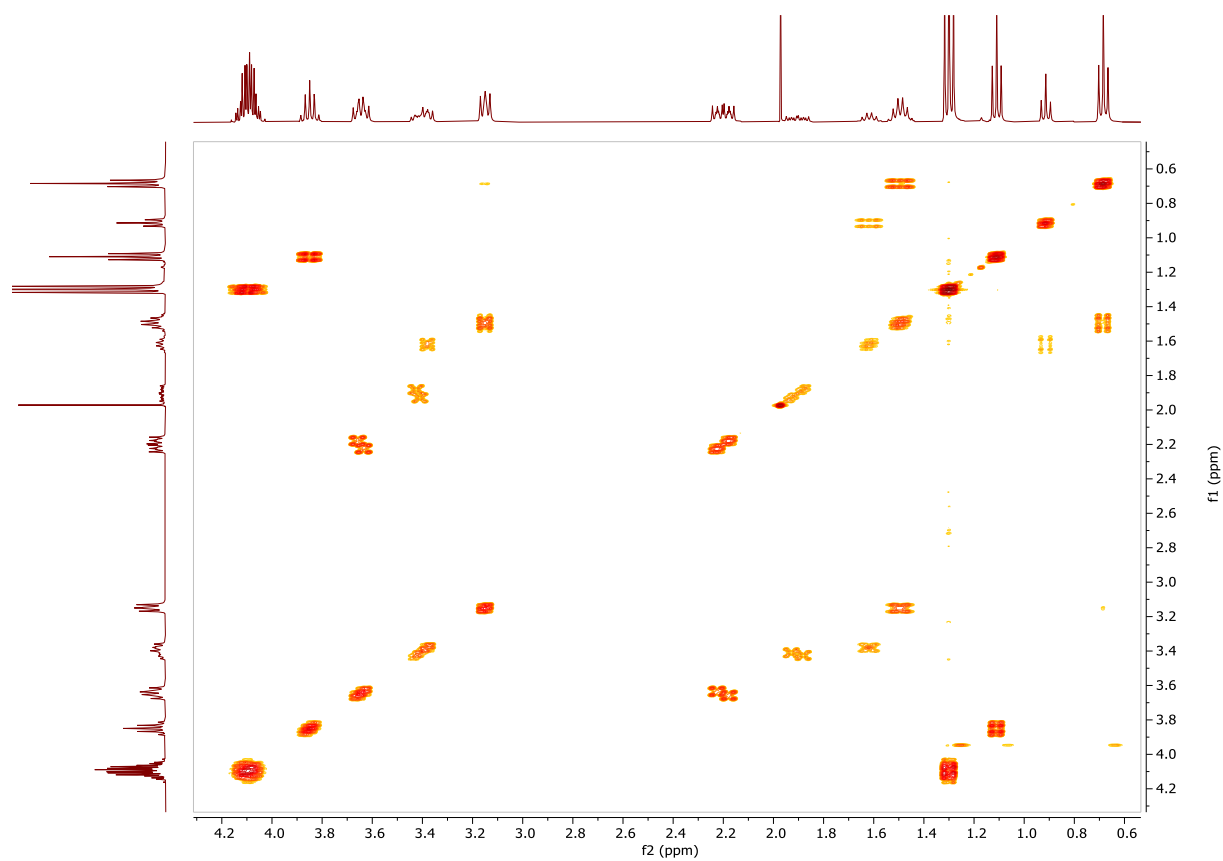

$^1\text{H}, ^{13}\text{C}$ -HSQC NMR spectrum of **8b** in  $\text{CDCl}_3$

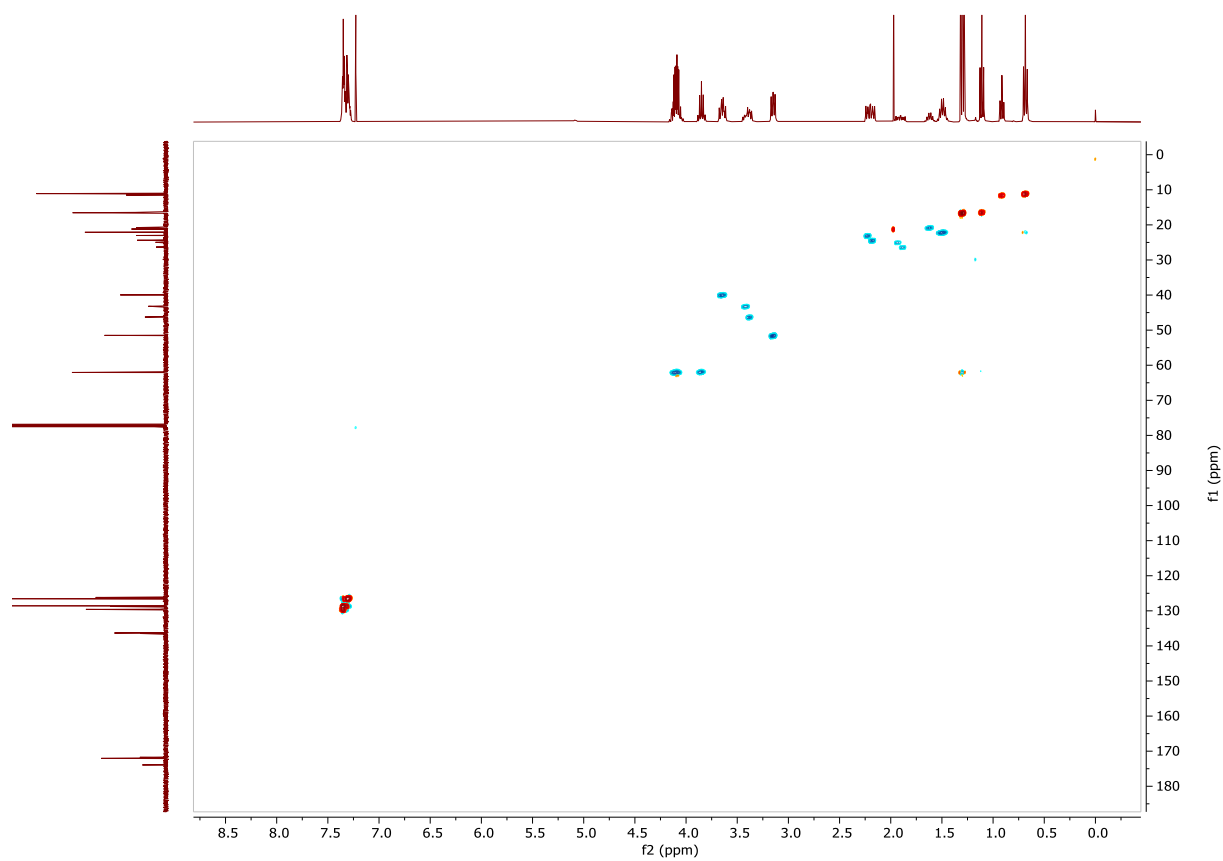

$^1\text{H}$ ,  $^{13}\text{C}$ -HSQC NMR spectrum of **8b** in  $\text{CDCl}_3$  (zoomed in)

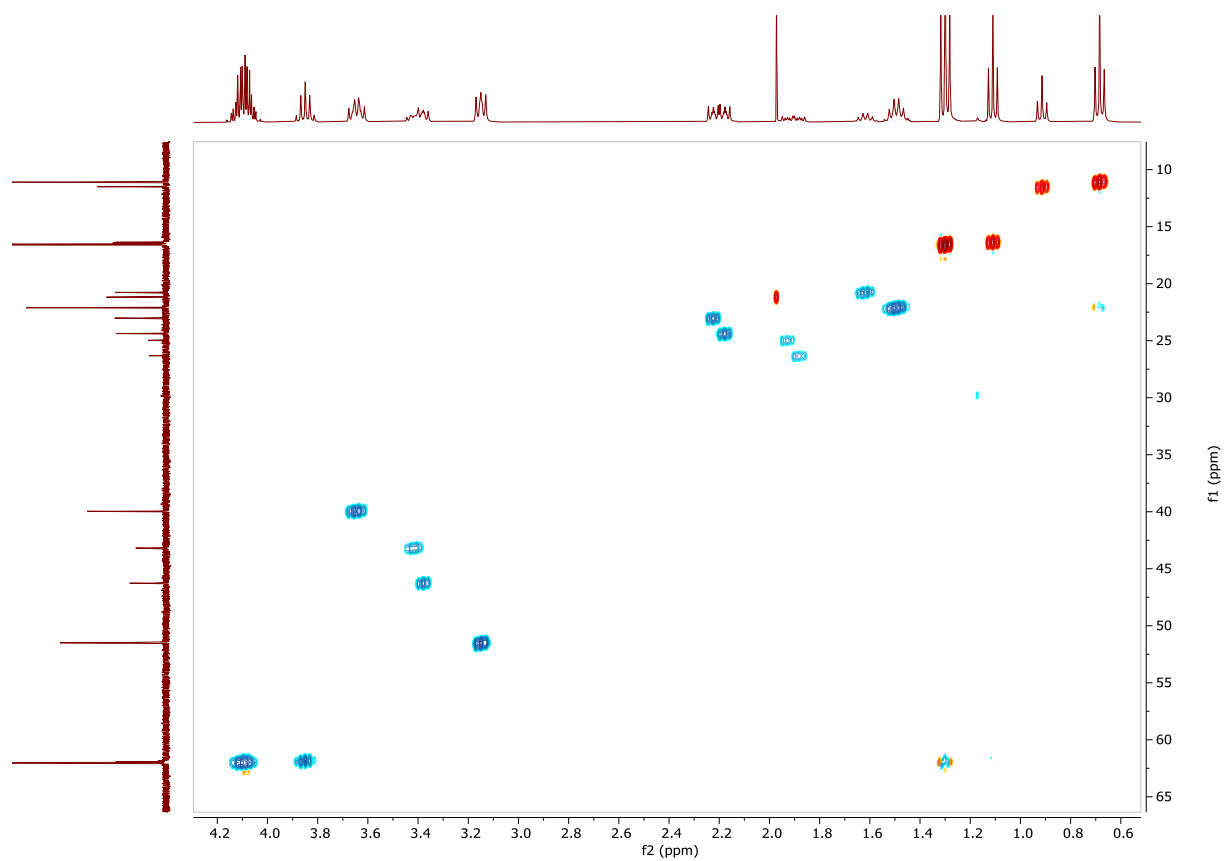

$^1\text{H}$ ,  $^{13}\text{C}$ -HSQC NMR spectrum of **8b** in  $\text{CDCl}_3$  (zoomed in)

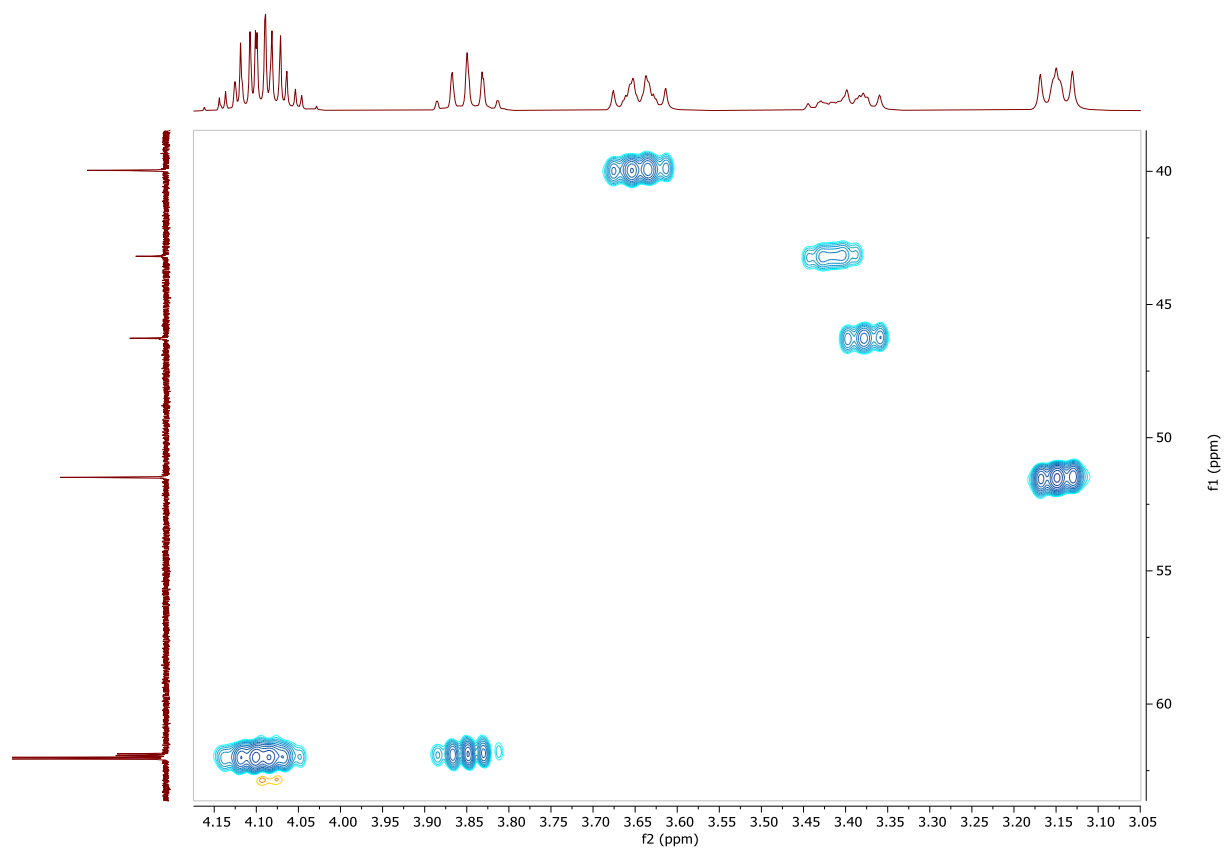

$^1\text{H}$ ,  $^{13}\text{C}$ -HSQC NMR spectrum of **8b** in  $\text{CDCl}_3$  (zoomed in)

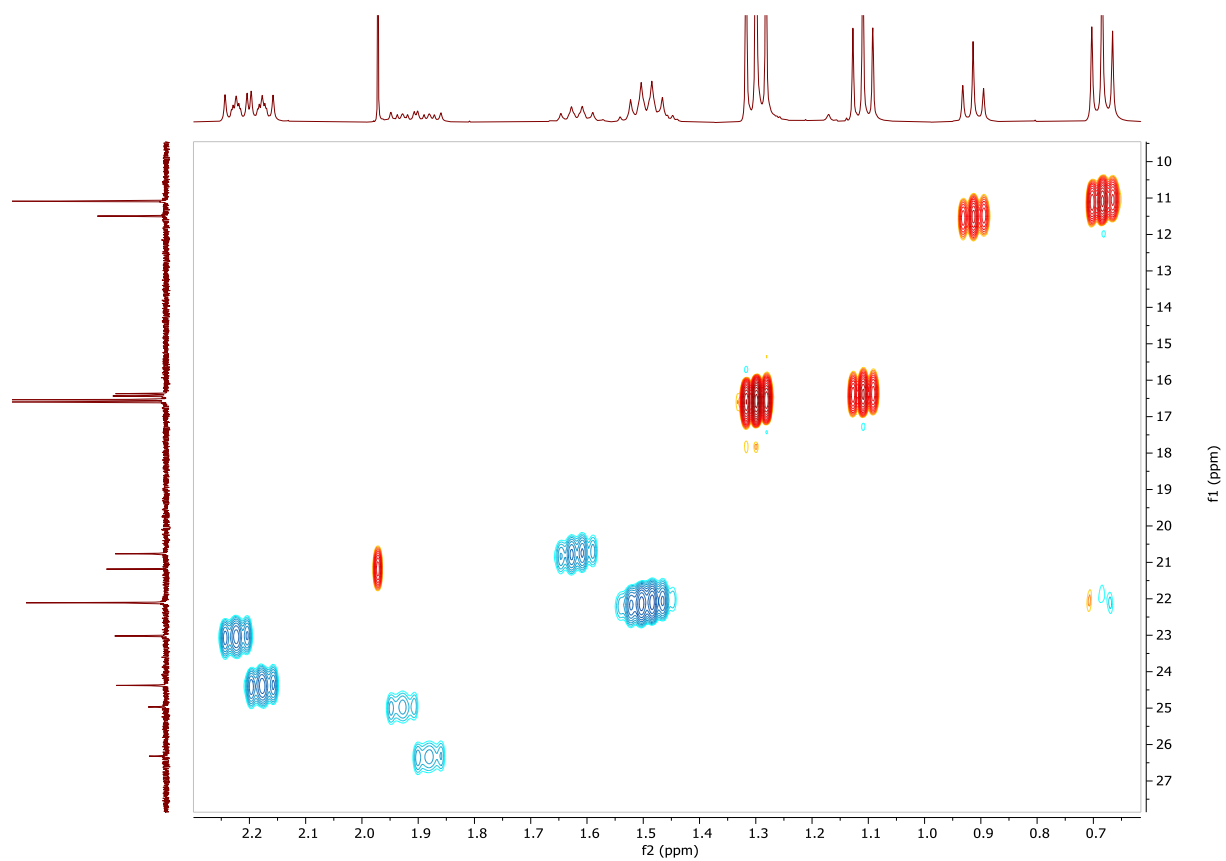

$^1\text{H}$ ,  $^{13}\text{C}$ -HMBC NMR spectrum of **8b** in  $\text{CDCl}_3$

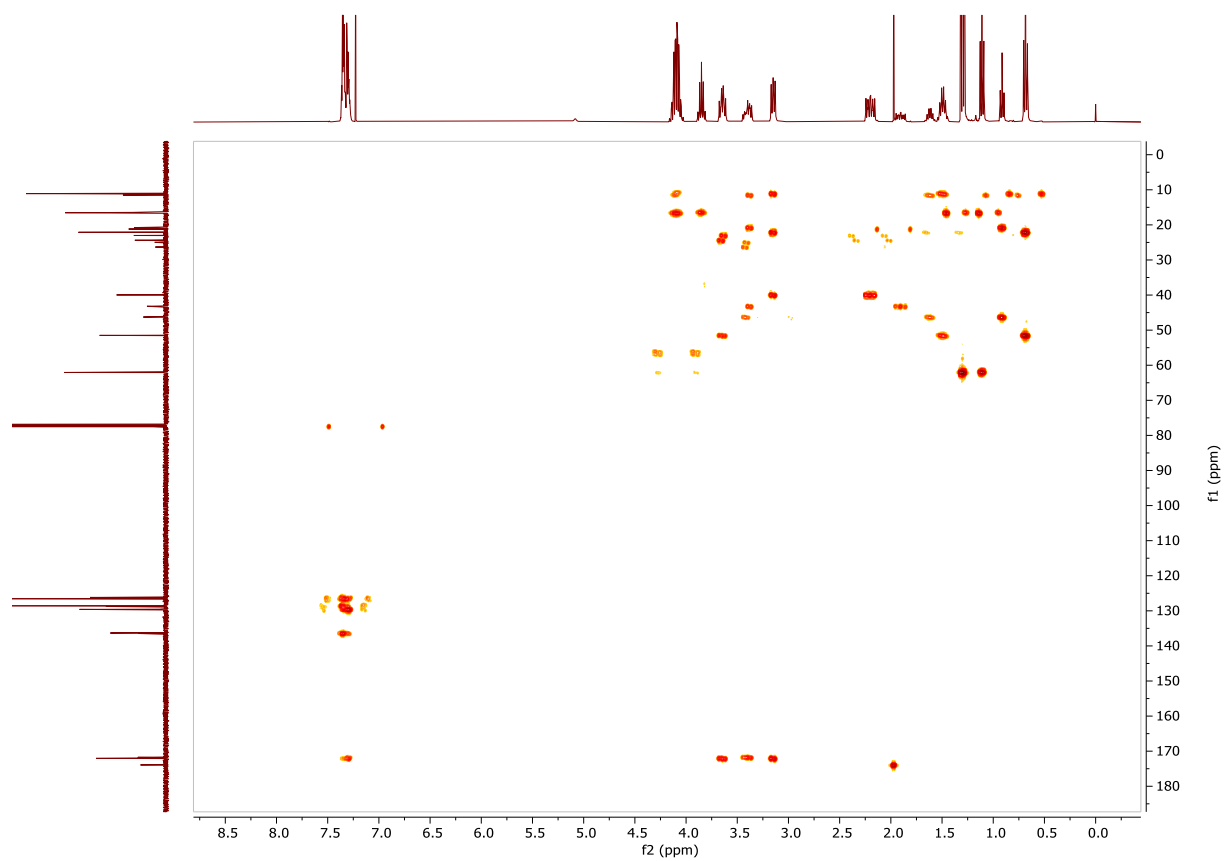



$^1\text{H}$ ,  $^{13}\text{C}$ -HMBC NMR spectrum of **8b** in  $\text{CDCl}_3$  (zoomed in)

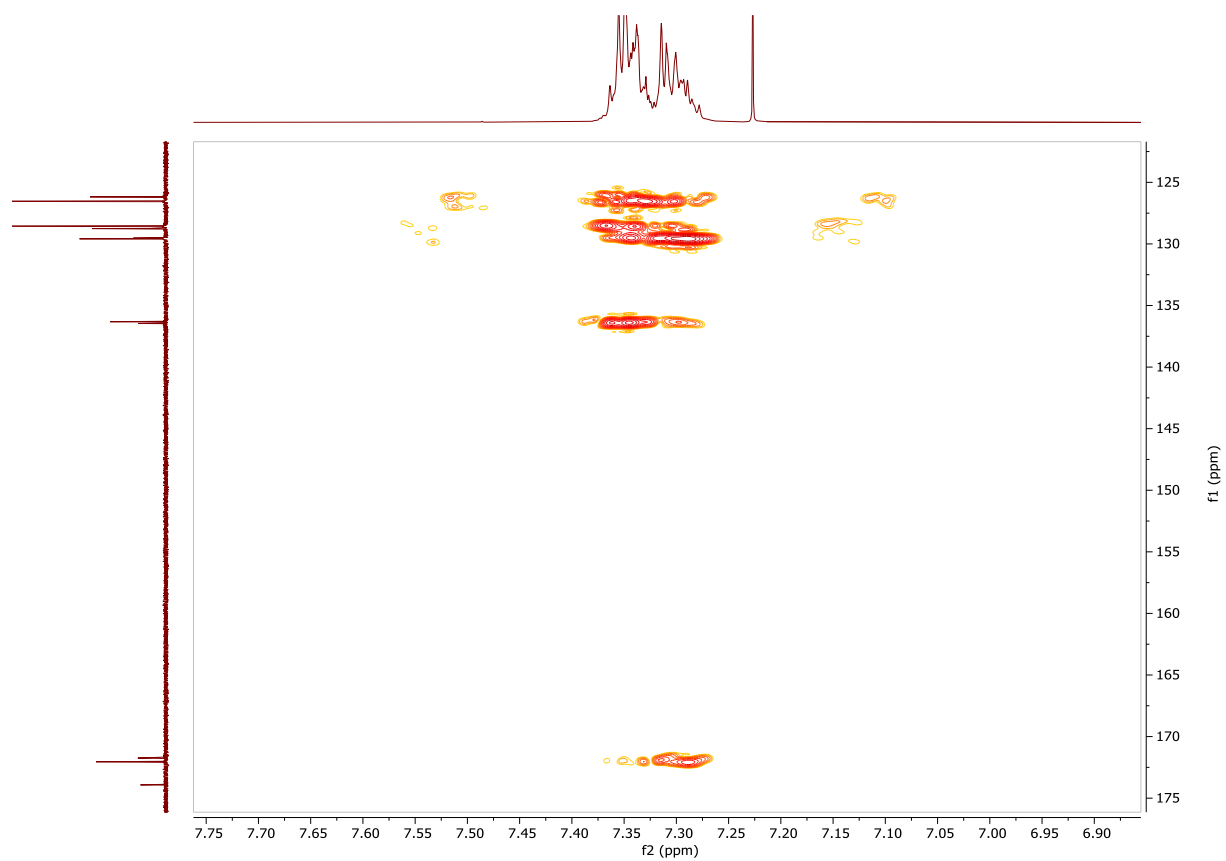

$^1\text{H}$ ,  $^{13}\text{C}$ -HMBC NMR spectrum of **8b** in  $\text{CDCl}_3$  (zoomed in)

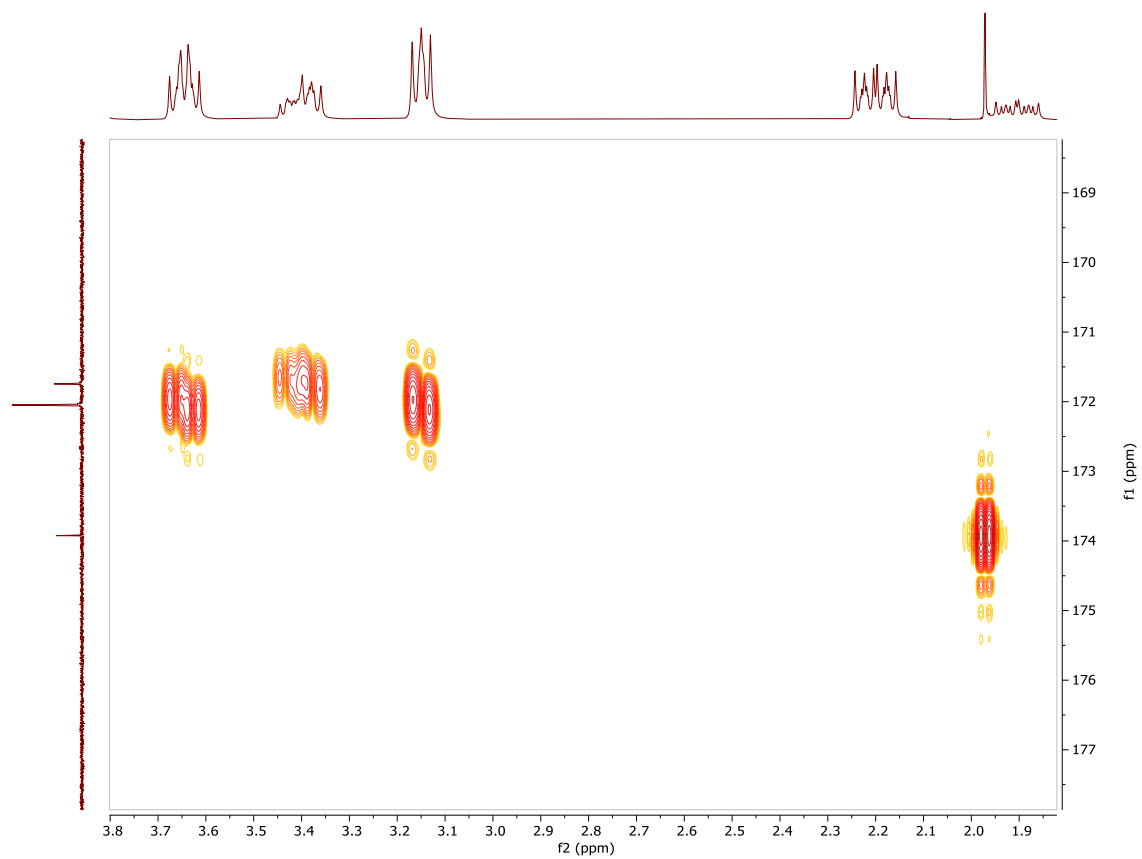

$^1\text{H}, ^{13}\text{C}$ -HMBC NMR spectrum of **8b** in  $\text{CDCl}_3$  (zoomed in)

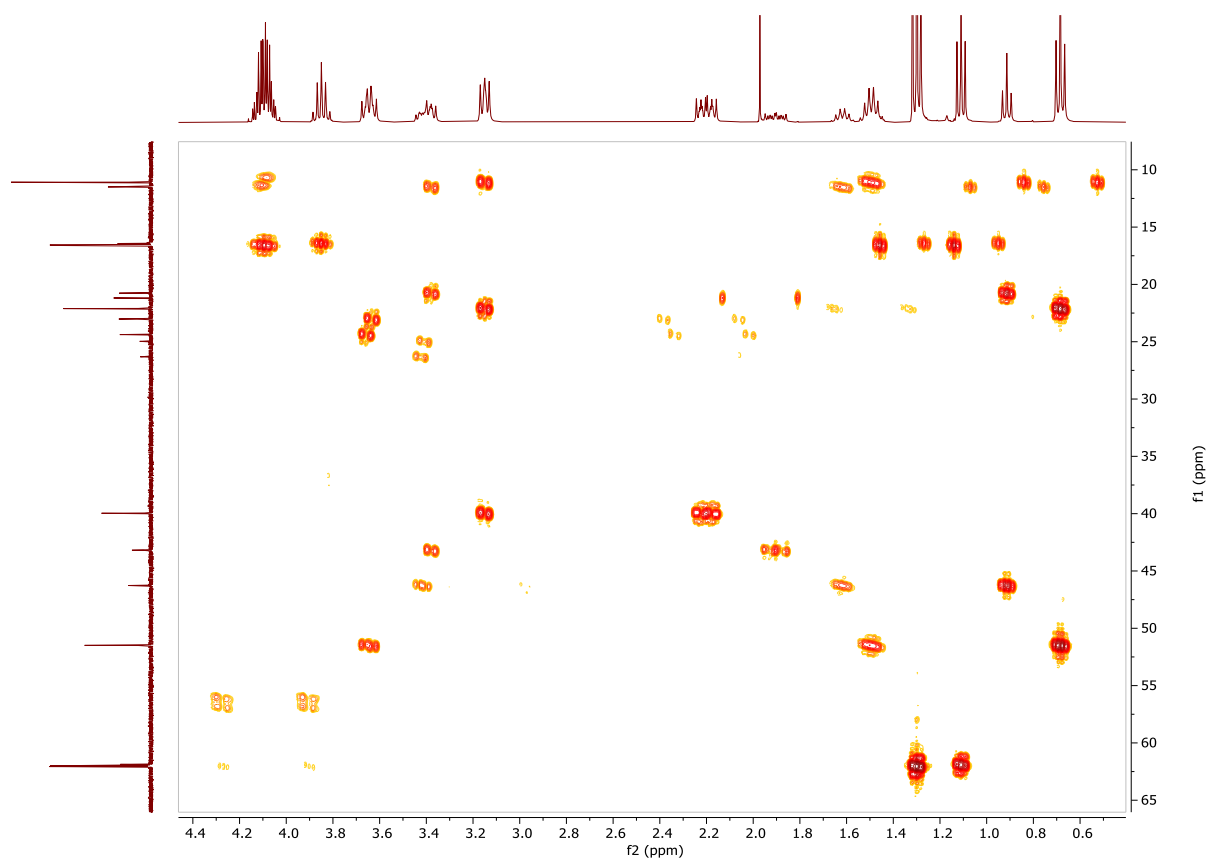

$^1\text{H}, ^1\text{H}$ -NOESY NMR spectrum of **8b** in  $\text{CDCl}_3$

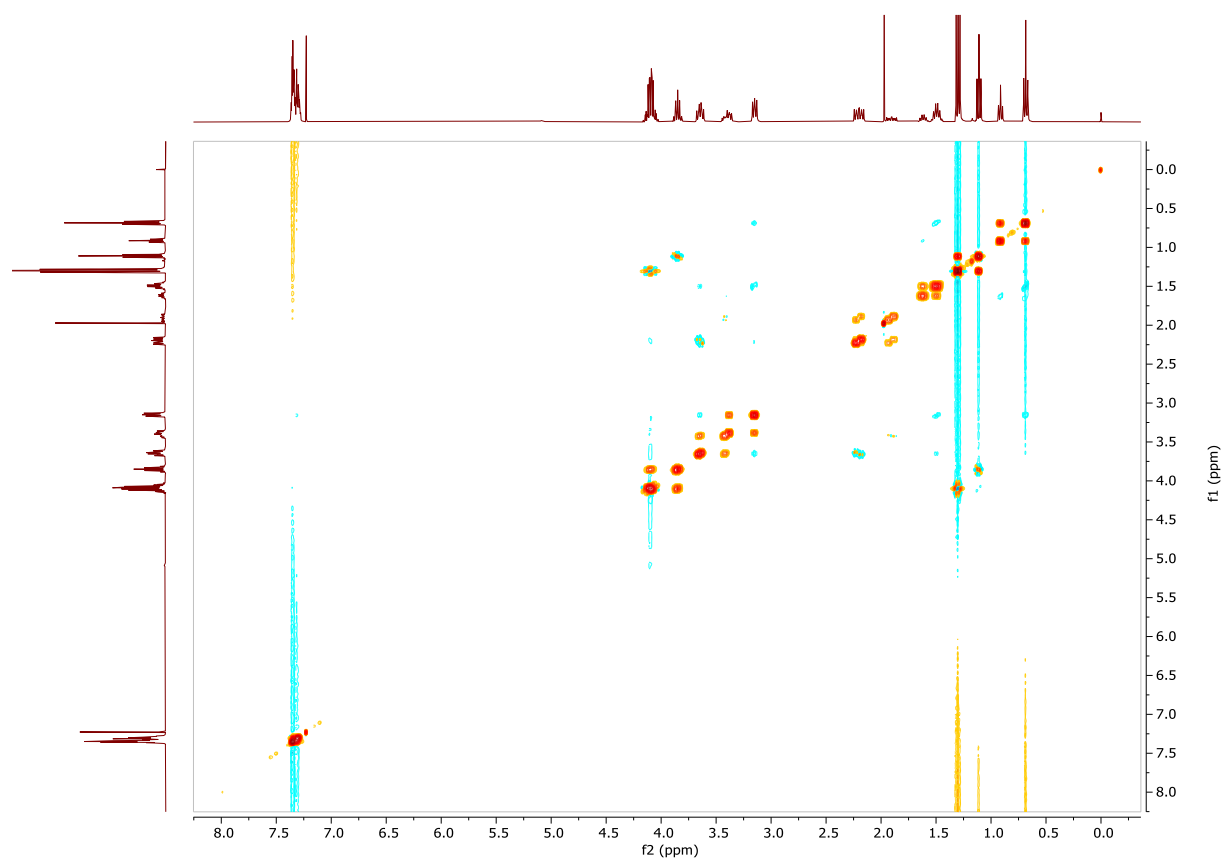

$^1\text{H}, ^{15}\text{N}$ -HMBC NMR spectrum of **8b** in  $\text{CDCl}_3$

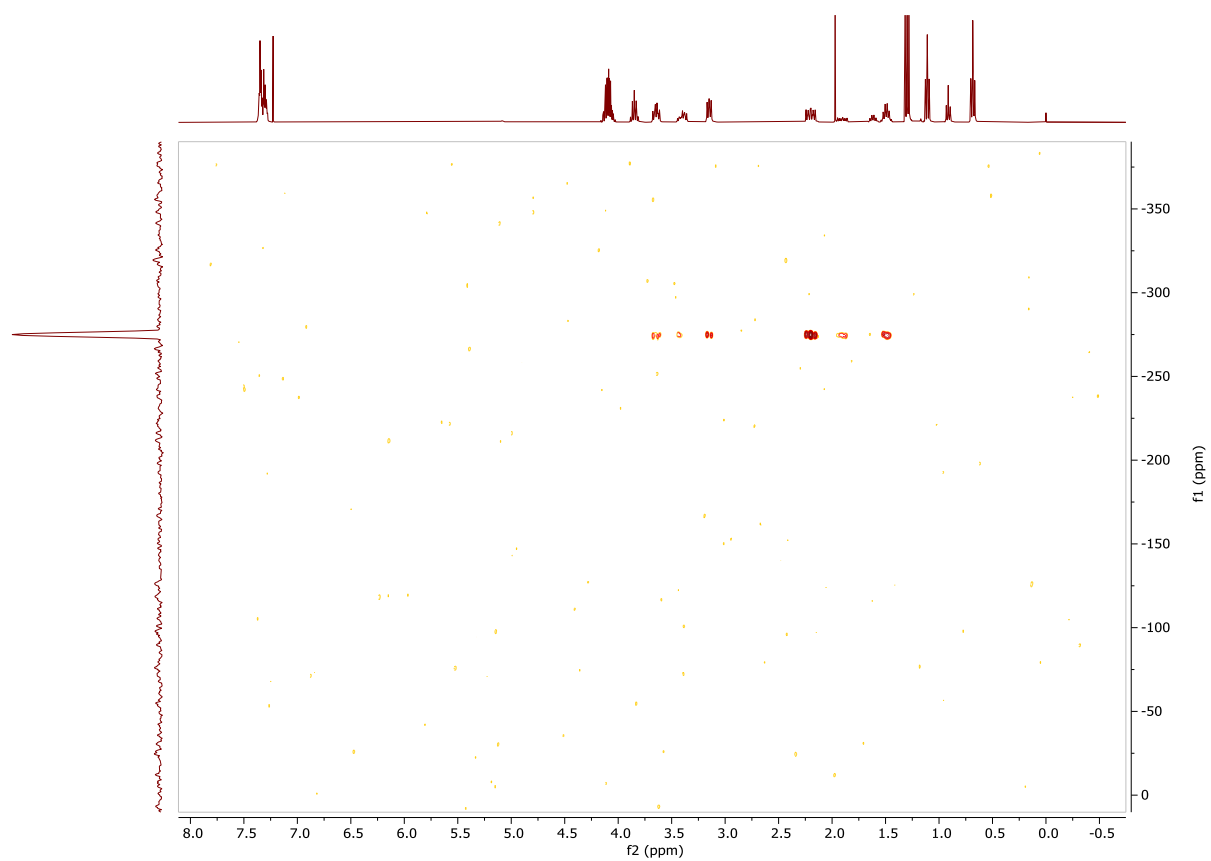

$^1\text{H}, ^1\text{H}$ -COSY NMR spectrum of **9a** in  $\text{CDCl}_3$

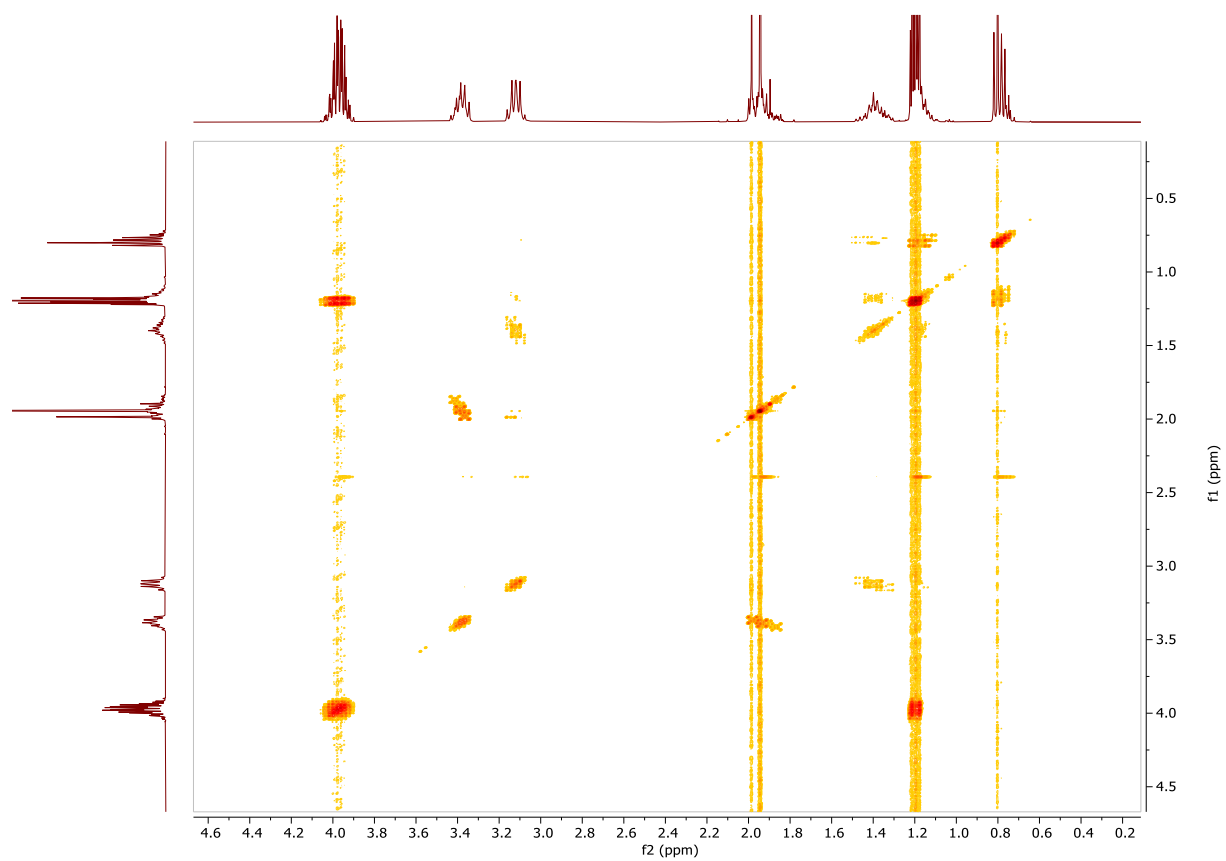

$^1\text{H}$ ,  $^{13}\text{C}$ -HSQC NMR spectrum of **9a** in  $\text{CDCl}_3$

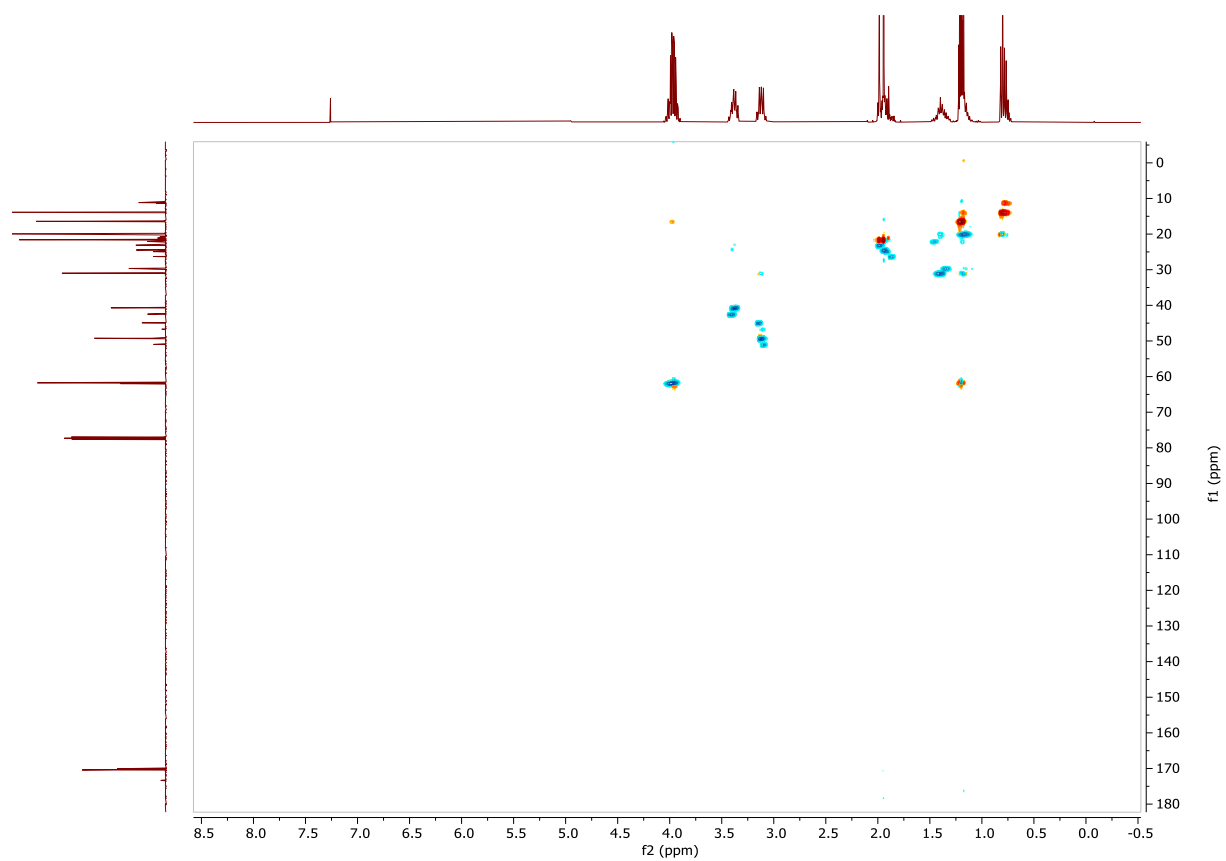

$^1\text{H}$ ,  $^{13}\text{C}$ -HSQC NMR spectrum of **9a** in  $\text{CDCl}_3$  (zoomed in)

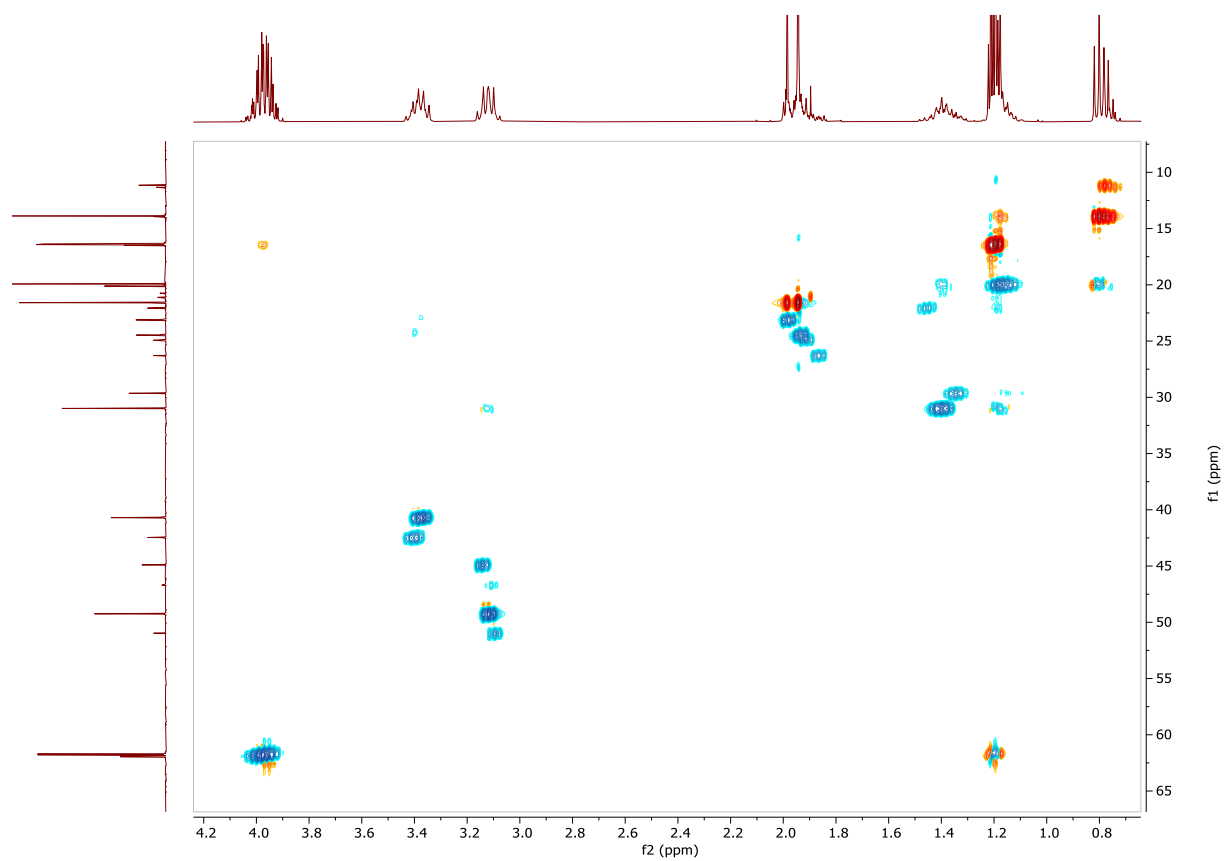

$^1\text{H}$ ,  $^{13}\text{C}$ -HSQC NMR spectrum of **9a** in  $\text{CDCl}_3$  (zoomed in)

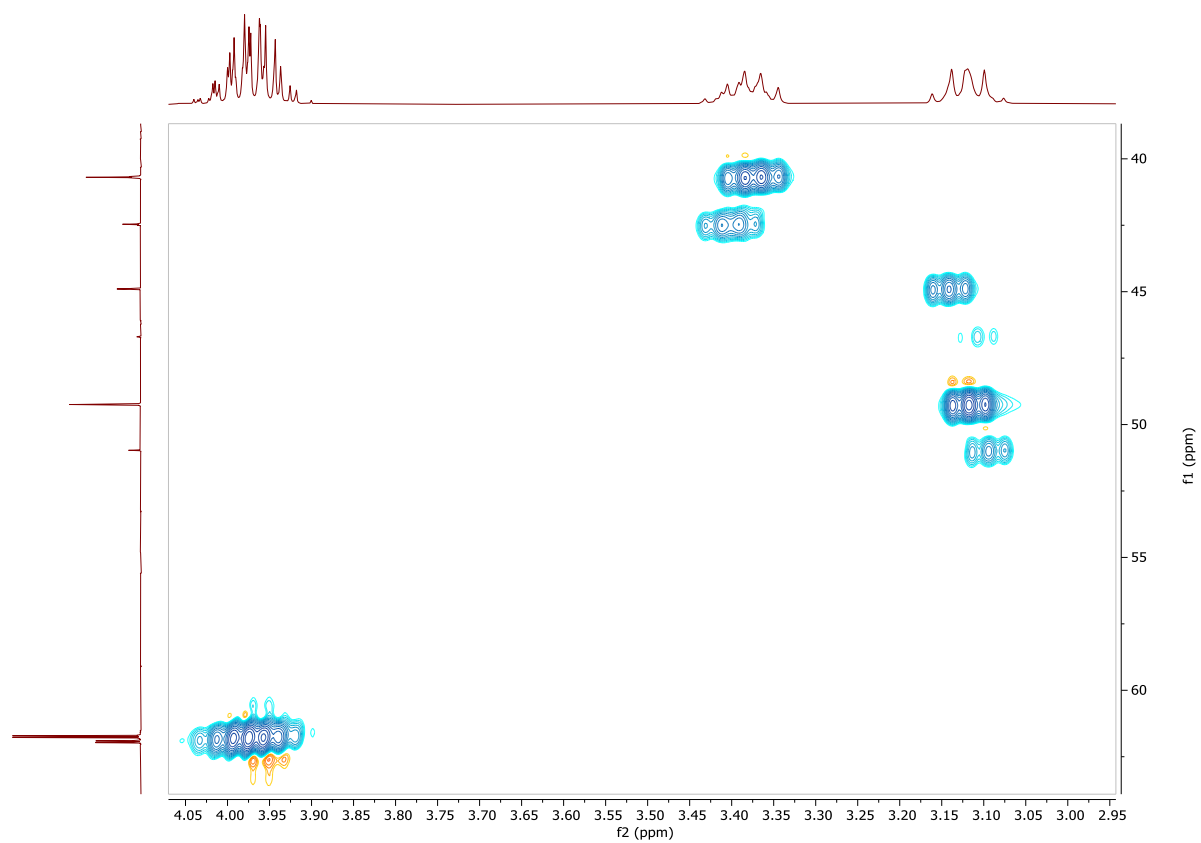

$^1\text{H}$ ,  $^{13}\text{C}$ -HSQC NMR spectrum of **9a** in  $\text{CDCl}_3$  (zoomed in)

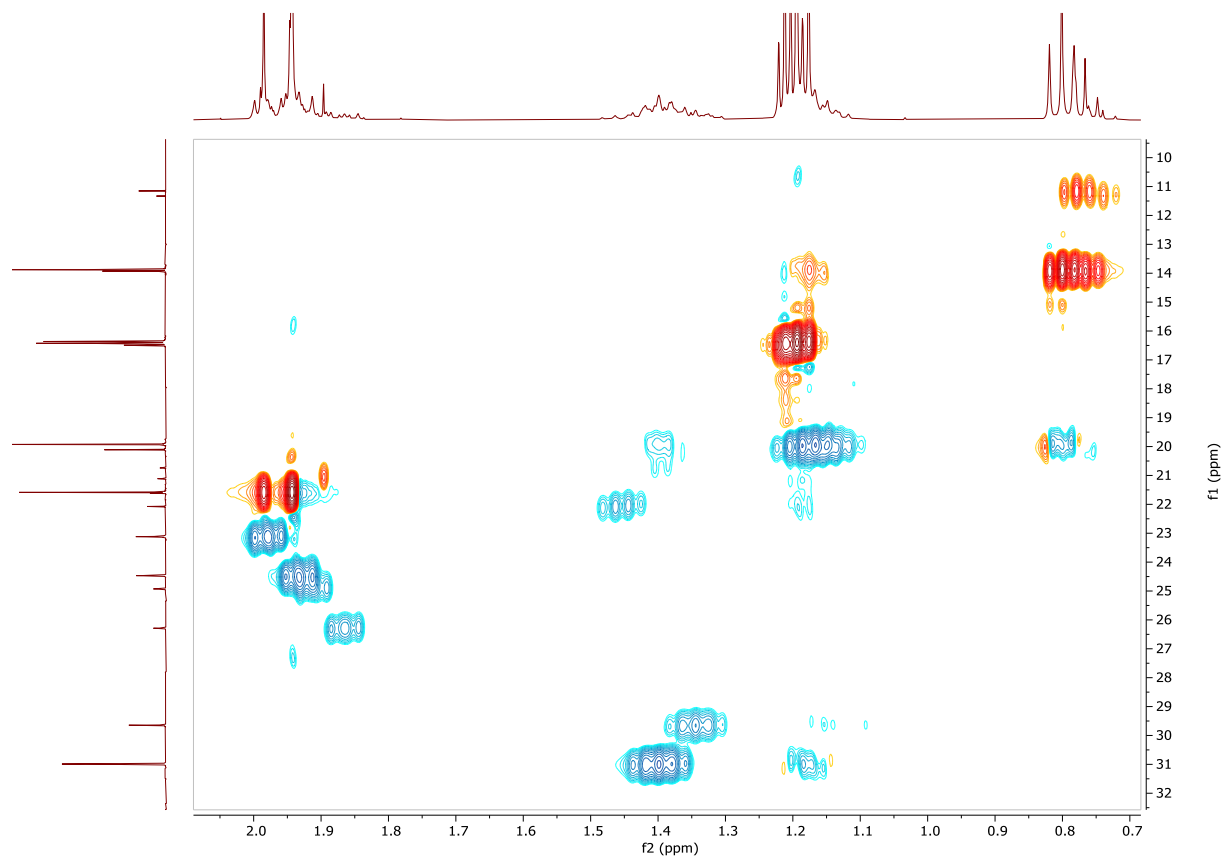

$^1\text{H}$ ,  $^{13}\text{C}$ -HMBC NMR spectrum of **9a** in  $\text{CDCl}_3$

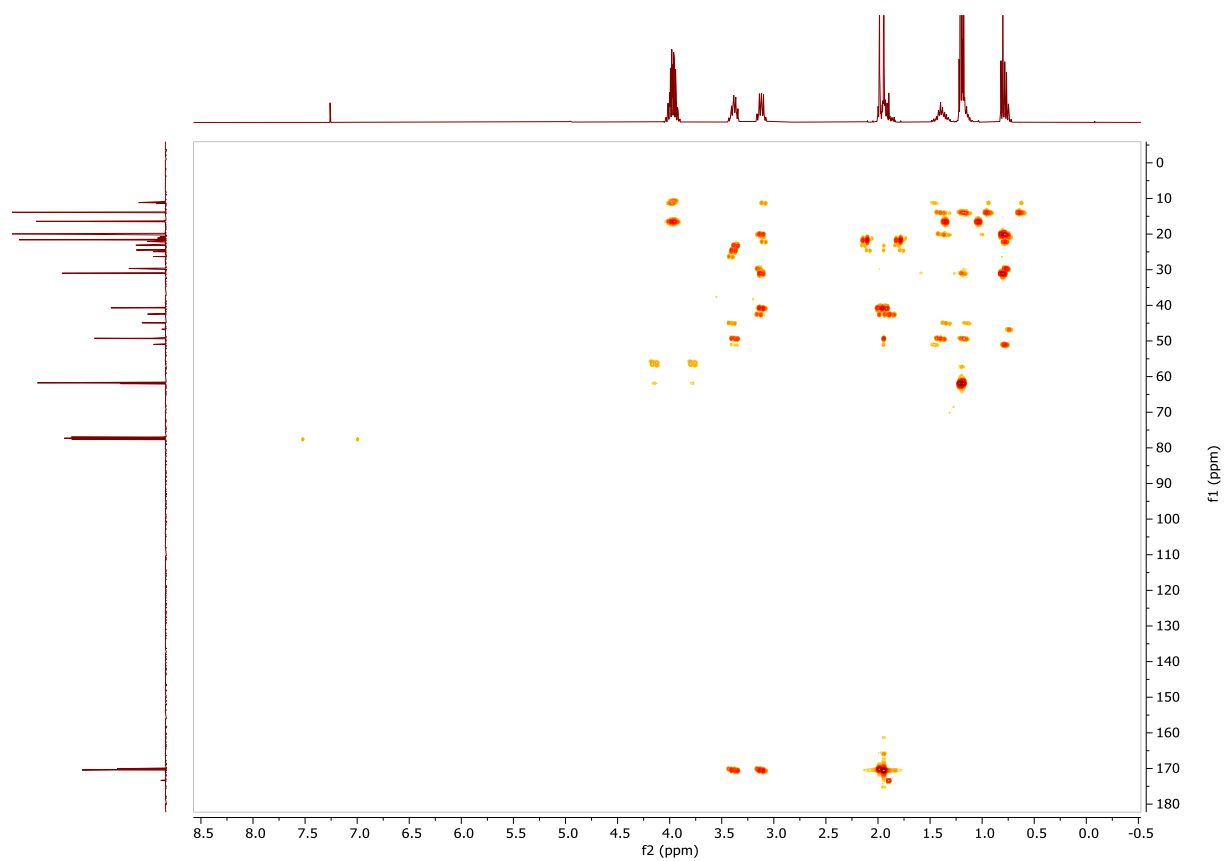

$^1\text{H}$ ,  $^{13}\text{C}$ -HMBC NMR spectrum of **9a** in  $\text{CDCl}_3$  (zoomed in)

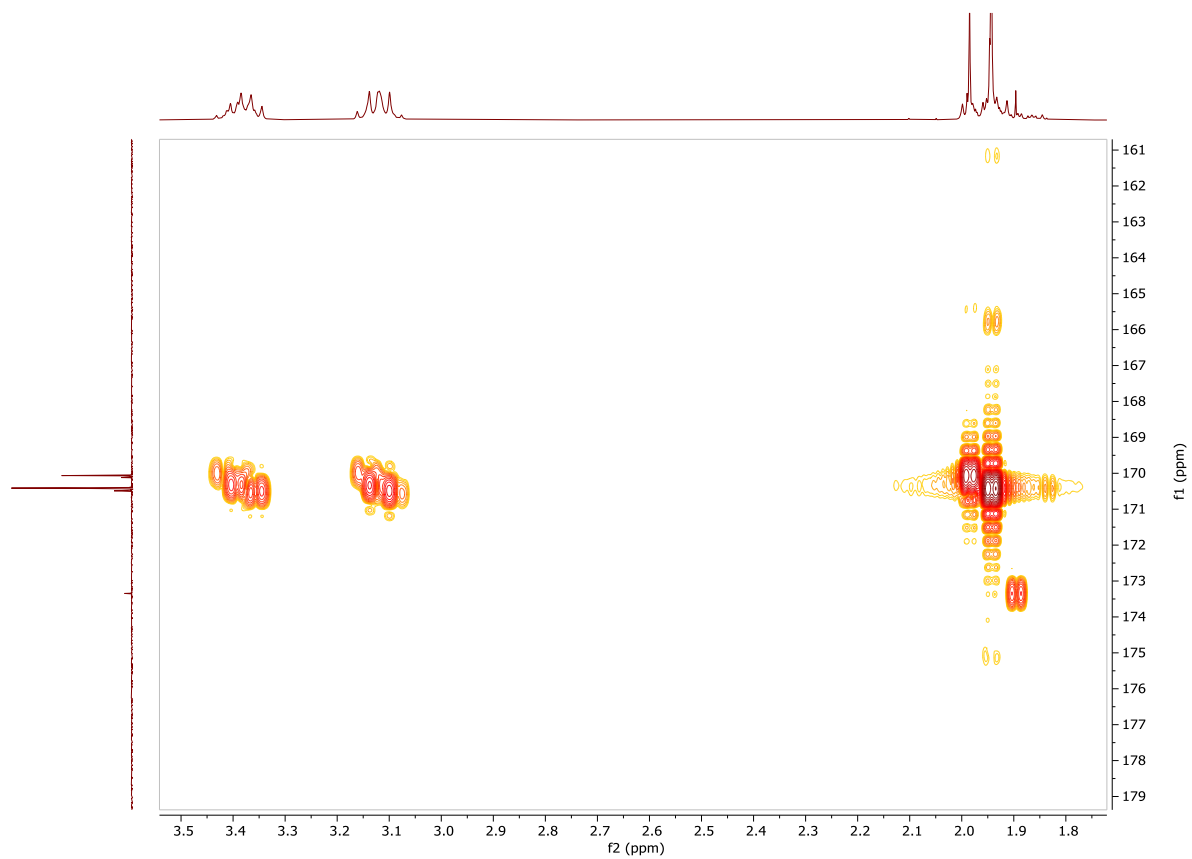

$^1\text{H}, ^{13}\text{C}$ -HMBC NMR spectrum of **9a** in  $\text{CDCl}_3$  (zoomed in)

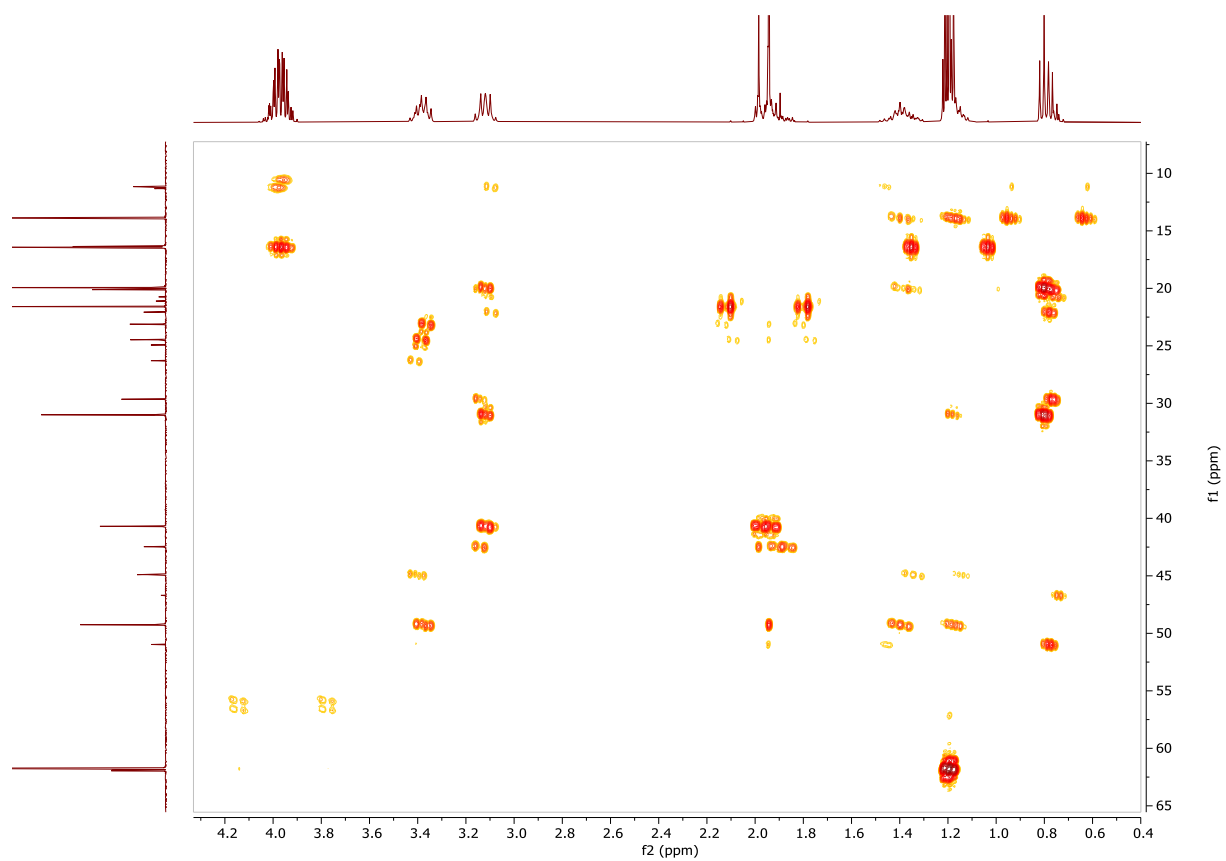

$^1\text{H}, ^1\text{H}$ -NOESY NMR spectrum of **9a** in  $\text{CDCl}_3$

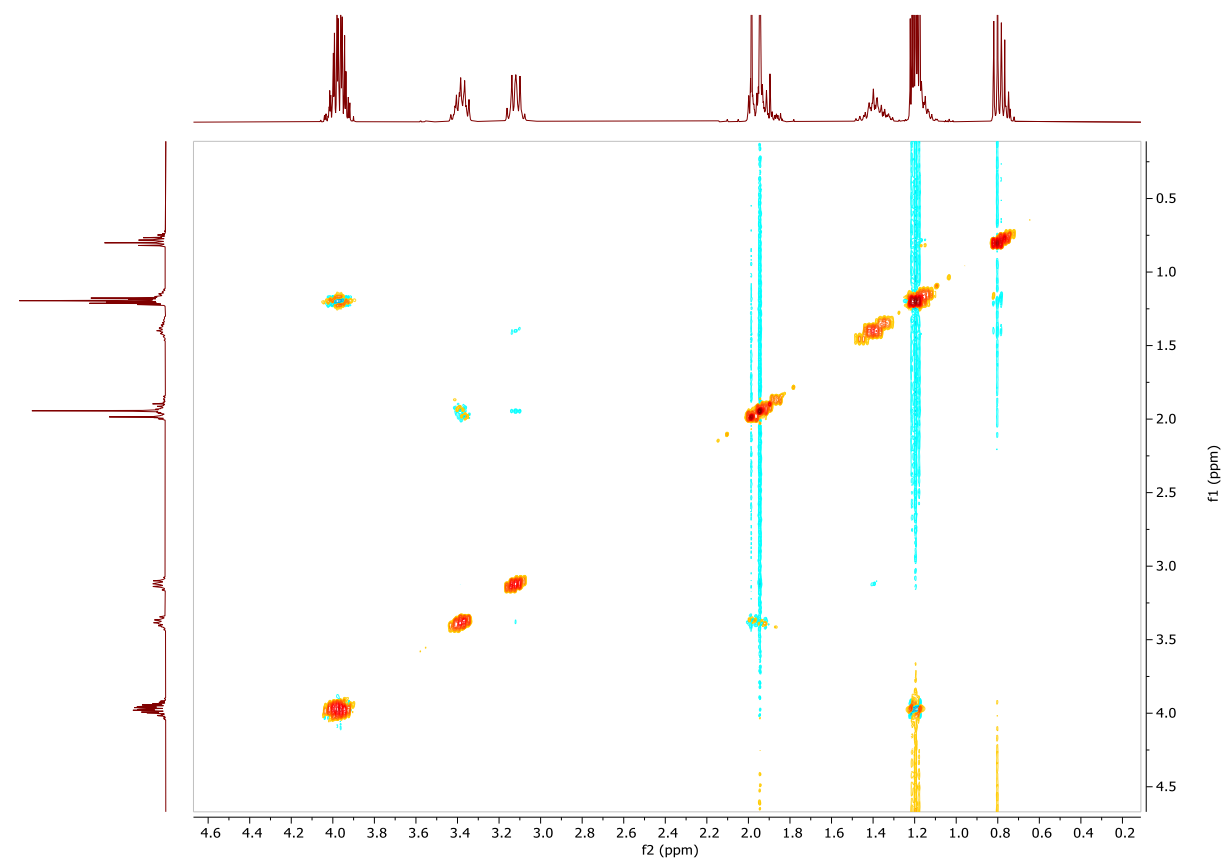

$^1\text{H}$ ,  $^{15}\text{N}$ -HMBC NMR spectrum of **9a** in  $\text{CDCl}_3$

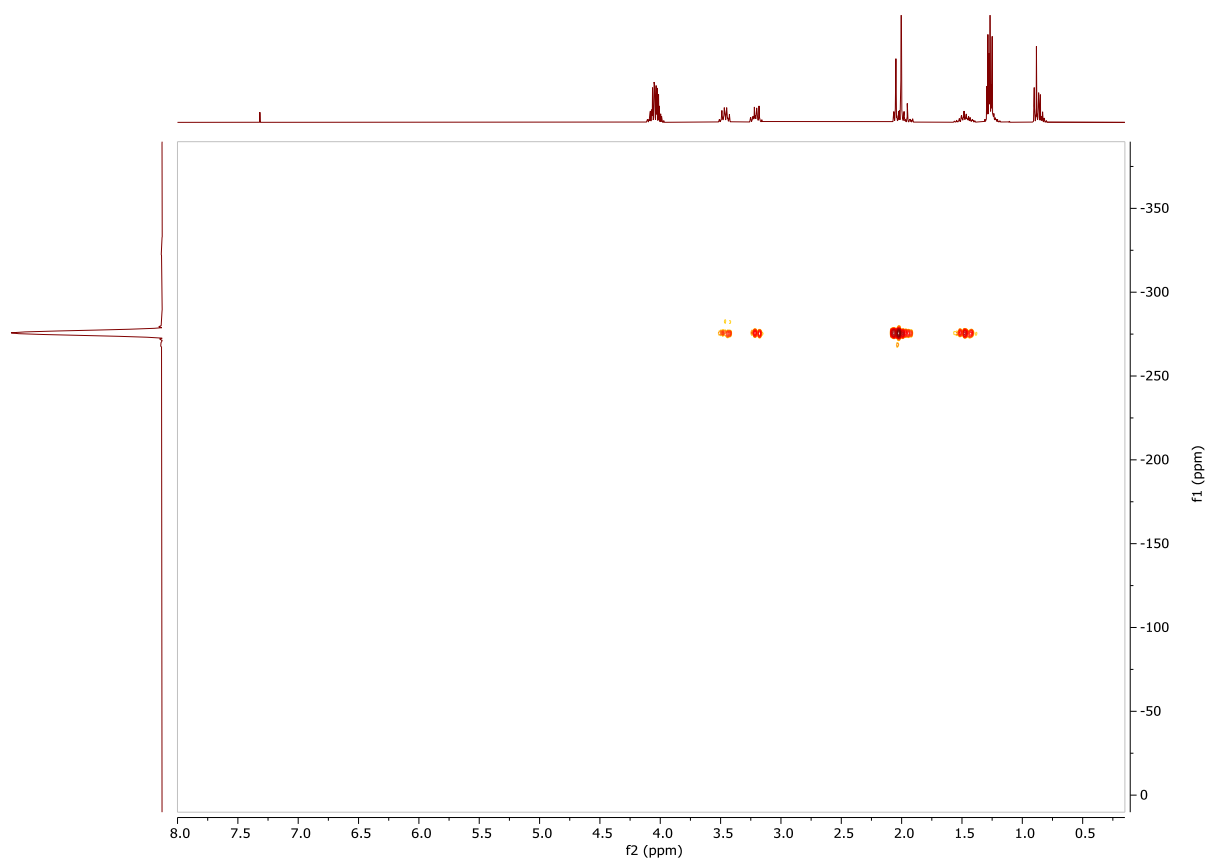

Supplement: d4ob00243a1.pdf [file d4ob00243a1.pdf]
